# Supplementary material for: Allogeneic human umbilical cord-derived mesenchymal stem/stromal cells for chronic obstructive pulmonary disease (COPD): study protocol for a matched case–control, phase I/II trial
Source: PubMed Central journal article supplement — BMJ Open. 2021 May 13;11(5):e045788. doi: 10.1136/bmjopen-2020-045788 (PMC8126295; doi:10.1136/bmjopen-2020-045788), 2021-05-13
Supplement: bmjopen-2020-045788.draft_revisions.pdf [file bmjopen-2020-045788.draft_revisions.pdf]

# BMJ Open

BMJ Open is committed to open peer review. As part of this commitment we make the peer review history of every article we publish publicly available.

When an article is published we post the peer reviewers' comments and the authors' responses online. We also post the versions of the paper that were used during peer review. These are the versions that the peer review comments apply to.

The versions of the paper that follow are the versions that were submitted during the peer review process. They are not the versions of record or the final published versions. They should not be cited or distributed as the published version of this manuscript.

BMJ Open is an open access journal and the full, final, typeset and author-corrected version of record of the manuscript is available on our site with no access controls, subscription charges or pay-per-view fees (<http://bmjopen.bmj.com>).

If you have any questions on BMJ Open's open peer review process please email [info.bmjopen@bmj.com](mailto:info.bmjopen@bmj.com)

# BMJ Open

## **Allogeneic human umbilical cord-derived mesenchymal stem/stromal cells for chronic obstructive pulmonary disease (COPD): study protocol for a matched case-control, phase I/II trial**

|                               |                                                                                                                                                                                                                                                                                                                                                                                                                                                                                                                                                                                     |
|-------------------------------|-------------------------------------------------------------------------------------------------------------------------------------------------------------------------------------------------------------------------------------------------------------------------------------------------------------------------------------------------------------------------------------------------------------------------------------------------------------------------------------------------------------------------------------------------------------------------------------|
| Journal:                      | <i>BMJ Open</i>                                                                                                                                                                                                                                                                                                                                                                                                                                                                                                                                                                     |
| Manuscript ID                 | bmjopen-2020-045788                                                                                                                                                                                                                                                                                                                                                                                                                                                                                                                                                                 |
| Article Type:                 | Protocol                                                                                                                                                                                                                                                                                                                                                                                                                                                                                                                                                                            |
| Date Submitted by the Author: | 13-Oct-2020                                                                                                                                                                                                                                                                                                                                                                                                                                                                                                                                                                         |
| Complete List of Authors:     | Hoang, Duc M.; Vinmec Health Care System, Vinmec Research Institute of Stem Cell and Gene Technology, Cellular Manufacturing Department<br>Nguyen, Kien T.; Vinmec Health Care System, Vinmec Research Institute of Stem Cell and Gene Technology, Scientific Research Department<br>Nguyen, Anh H.; Vinmec Times City International Hospital, Department of Internal Medicine<br>Nguyen, Bach N.; Vinmec Times City International Hospital, Department of Internal Medicine<br>Nguyen, Liem; Vinmec Health Care System, Vinmec Research Institute of Stem Cell and Gene Technology |
| Keywords:                     | Chronic airways disease < THORACIC MEDICINE, Transplant medicine < INTERNAL MEDICINE, RESPIRATORY MEDICINE (see Thoracic Medicine)                                                                                                                                                                                                                                                                                                                                                                                                                                                  |
|                               |                                                                                                                                                                                                                                                                                                                                                                                                                                                                                                                                                                                     |

SCHOLARONE™  
Manuscripts

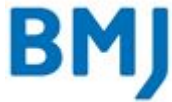

I, the Submitting Author has the right to grant and does grant on behalf of all authors of the Work (as defined in the below author licence), an exclusive licence and/or a non-exclusive licence for contributions from authors who are: i) UK Crown employees; ii) where BMJ has agreed a CC-BY licence shall apply, and/or iii) in accordance with the terms applicable for US Federal Government officers or employees acting as part of their official duties; on a worldwide, perpetual, irrevocable, royalty-free basis to BMJ Publishing Group Ltd ("BMJ") its licensees and where the relevant Journal is co-owned by BMJ to the co-owners of the Journal, to publish the Work in this journal and any other BMJ products and to exploit all rights, as set out in our [licence](#).

The Submitting Author accepts and understands that any supply made under these terms is made by BMJ to the Submitting Author unless you are acting as an employee on behalf of your employer or a postgraduate student of an affiliated institution which is paying any applicable article publishing charge ("APC") for Open Access articles. Where the Submitting Author wishes to make the Work available on an Open Access basis (and intends to pay the relevant APC), the terms of reuse of such Open Access shall be governed by a Creative Commons licence – details of these licences and which [Creative Commons](#) licence will apply to this Work are set out in our licence referred to above.

Other than as permitted in any relevant BMJ Author's Self Archiving Policies, I confirm this Work has not been accepted for publication elsewhere, is not being considered for publication elsewhere and does not duplicate material already published. I confirm all authors consent to publication of this Work and authorise the granting of this licence.

1  
2  
3 **Allogeneic human umbilical cord-derived mesenchymal stem/stromal cells for chronic obstructive pulmonary**  
4 **disease (COPD): study protocol for a matched case-control, phase I/II trial.**  
5

6 Duc M. Hoang<sup>1\*</sup>, Kien T. Nguyen<sup>1\*</sup>, Anh H. Nguyen<sup>2</sup>, Bach N. Nguyen<sup>2</sup>, Liem Nguyen Thanh<sup>\*1</sup>.  
7

8 \*These authors contributed equally to the work.  
9

10 <sup>1</sup>Vinmec Research Institute of Stem Cell and Gene Technology, Hanoi, Vietnam.  
11

12 <sup>2</sup> Department of Internal Medicine, Vinmec Times City International Hospital, Hanoi, Vietnam.  
13

14 Correspondence to: Dr Duc M. Hoang. Email: [v.duchm3@vinmec.com](mailto:v.duchm3@vinmec.com), Department of Cellular Manufacturing,  
15 Vinmec Research Institute of Stem Cell and Gene Technology, Vinmec Health Care System, Hanoi, Vietnam.  
16  
17

18  
19 **Keywords:** Umbilical cord-derived Mesenchymal Stem/stromal Cells, Chronic Obstructive Pulmonary Disease  
20 (COPD), allogeneic MSC administration, clinical trial.  
21  
22

23 **Word count:** 4282 words  
24  
25  
26  
27  
28  
29  
30  
31  
32  
33  
34  
35  
36  
37  
38  
39  
40  
41  
42  
43  
44  
45  
46  
47  
48  
49  
50  
51  
52  
53  
54  
55  
56  
57  
58  
59  
60

## Abstract

### *Introduction*

The global prevalence of chronic obstructive pulmonary disease (COPD) is increasing, and it has become a major public health burden worldwide, including in Vietnam. A large body of preclinical and clinical studies supports the safety and efficacy of mesenchymal stem/stromal cells (MSCs) in the treatment of lung injury, including COPD. The aim of this trial is to investigate the safety and potential therapeutic efficacy of allogeneic administration of umbilical cord-derived MSCs (UC-MSCs) as a supplementary intervention in combination with standard COPD medication treatments in patients with moderate-to-severe COPD based on the Global Initiative for Chronic Obstructive Lung Disease (GOLD) 2019 and Vietnam Ministry of Health's guidelines.

### *Methods and analysis*

This matched case-control phase I/II trial is conducted at Vinmec Times City International Hospital, Hanoi, Vietnam between June 2020 and December 2021. In this study, 40 patients will be enrolled and assigned into two age-, gender- and COPD condition-matched groups, including a UC-MSC group and a control group. Both groups will receive standard COPD medication treatment based on the GOLD 2019 guidelines and the Vietnam Ministry of Health protocol. The UC-MSC group will receive two doses of thawed UC-MSC product with an intervention interval of 3 months. The primary outcome measures will include the incidence of prespecified administration-associated adverse events (AEs) and serious adverse events (SAEs). The efficacy will be evaluated based on the absolute changes in the number of admissions, arterial blood gas analysis, lung function and lung fibrosis via CT scan and chest X-ray. The clinical evaluation will be conducted at baseline and 3, 6, and 12 months post intervention.

### *Ethics and dissemination*

Ethical approval was secured from the Ethical Committee of Vinmec International Hospital (number: 166/2019/QĐ-VMEC) and Vietnam Ministry of Health (number: 2002/QĐ-BYT).

**Trial registration number:** NCT04433104.

### Strengths and Limitations

- This project is the first matched case-control phase I/II study to evaluate the safety and efficacy of allogeneic administration of UC-MSCs as supplementary treatment in combination with standard medication treatments for patients with moderate-to-severe COPD.
- To address the challenge of evaluating the effectiveness of MSC treatment in COPD by using quantitative and qualitative research methods.
- To interlink the treatment effectiveness with stem cell phenotype analysis to broaden our understanding of UC-MSC effects in COPD.
- The limitation of this study is that it was not conducted as a randomized control trial due to the complexity of the process and patient recruitment as well as the challenges of undertaking clinical trials in COPD patients due to the heterogeneity of disease mechanisms and phenotypic expression.

## Introduction

Chronic obstructive pulmonary disease (COPD) is described – but not defined – as one of the major chronic lung diseases characterized by persistent and progressive airflow obstruction. It is caused by an elevated chronic pulmonary inflammatory response in the airways and bronchial structure to noxious particles or gases. The pathological hallmarks of the disease include obstructive bronchiolitis, emphysema, and mucus hypersecretion<sup>1</sup>. Despite many medical advancements and technological improvements, our understanding of the pathological mechanisms underlying the progressive and detrimental development of COPD remains incomplete, the definition of the disease is controversial, diagnostic tests are inaccurate and unstandardized, and the treatment is inadequate<sup>2</sup>. A recent report stated that the global prevalence of COPD increased by 44% within the last 20 years, and more than 3.2 million patients died each year from COPD worldwide (accounting for approximately 5% of all deaths globally per year)<sup>3</sup>. In Vietnam, according to the WHO report, 7.1% of males and 1.9% of females aged 40 and above are diagnosed with COPD. Consequently, approximately 25% of hospital beds in respiratory wards are required for COPD patients, resulting in a heavy burden to Vietnamese Medical Infrastructure and reducing patients' health and quality of life<sup>4</sup>. The current pharmacological medications for COPD include the use of inhaled bronchodilator drugs, such as long-acting  $\beta$  agonists (LABAs) and long-acting muscarinic antagonists (LAMAs), the use of inhaled corticosteroids (ICSs) or a combination of these medications. Although it is generally accepted that pharmacological interventions via inhalation would allow the accurate delivery of drugs and increase the clinical benefits, incorrect inhaler technique and a lack of adherence when feeling healthy caused worse dyspnea, impaired health condition, and increased the frequency of exacerbations and hospitalizations in Vietnamese COPD patients<sup>5</sup>. Therefore, identifying novel effective therapies for COPD patients is urgent and important.

Since their first discovery in 1968, mesenchymal stem/stromal cells (MSCs) have been intensively studied because of their therapeutic and regenerative features. The nomenclature of MSCs has been debated recently due to not only the biological features of the MSCs themselves but also the medical abuse of the term “stem cells” inferring direct medical benefit<sup>6</sup>. To standardize the characterization of MSCs and facilitate their therapeutic implications, the International Society for Cellular Therapy (ISCT) has proposed the minimum criteria to define human MSCs<sup>7,8</sup>. In our study, MSCs were defined as mesenchymal stem/stromal cells, which are a class of adult mesenchymal progenitor cells derived from either bone marrow, adipose, or umbilical cord tissue and met the minimum criteria of ISCT. Among various sources of MSCs, human umbilical cord-derived MSCs (hUC-MSCs) are potentially more advanced than their adult counterparts (bone marrow or adipose) for several reasons: (1) ease of collection as it is a noninvasive process, (2) waiving ethical barriers as UC is medical waste discarded at birth, (3) rapid proliferation rate, (4) maintenance of normal karyotype during prolonged culture *in vitro*, and (4) higher paracrine potency than adult tissue-derived MSCs<sup>9</sup>. The therapeutic potential of hUC-MSCs has been proven in clinical studies, especially animal pulmonary disease models, including acute respiratory distress syndrome (ARDS), bronchopulmonary dysplasia (BPD), and COPD. It has been reported that UC-MSCs are effective in reducing lung inflammation and fibrosis processes, preventing secondary infection, decreasing immune system damage, increasing bronchoalveolar fluid clearance, and enhancing the regeneration of alveolar epithelium layers<sup>10-12</sup>. The majority of intravenously

1  
2  
3 administered MSCs reportedly remain in the lung, especially pulmonary microvessels, which potentially contribute to  
4 their beneficial effects in pulmonary disease models<sup>13</sup>. Hence, the safety and therapeutic effects of UC-MSC  
5 administration for COPD require further investigation and clarification.  
6  
7

8 To date, five completed clinical trials have used bone marrow mononuclear cells (BMMCs), bone marrow-  
9 derived MSCs (BM-MSCs), and UC-MSCs in COPD<sup>14-19</sup>. Although these clinical trials provided an enormous amount  
10 of data supporting the safety of the therapy in the treatment of COPDs, the efficacy of the treatments remained  
11 controversial due to several limitations, including trial design, lack of standardization of cell numbers administered to  
12 patients, timing of MSC administration, and, most importantly, the lack of a control group in several studies. Moreover,  
13 the variations in patient selection based on the severity and stage of COPD could be attributed to the effectiveness of  
14 the cell therapy, resulting in caution in data interpretation. Last but not least, the quality of administered MSCs also  
15 plays a significant role in the effectiveness of the treatment, i.e., the status of the cells (fresh culture vs. frozen cells),  
16 cell sources (from young healthy donors or aging individuals), dosage frequency, etc. Therefore, identification of the  
17 potential sources of MSCs (such as UC-MSCs), larger sample size with matched controls, and standardized  
18 classification of COPD using international accepted criteria is required to further investigate the safety and efficacy  
19 of MSC therapy. Based on the large body of preclinical studies and previous promising findings, we designed a  
20 matched control phase I/II clinical trial to evaluate the safety and efficacy of the intravenous infusion of allogeneic  
21 hUC-MSCs in patients with COPD characterized based on the Global Initiative for Chronic Obstructive Lung Disease  
22 (GOLD) 2019 criteria<sup>20</sup>.  
23  
24  
25  
26  
27  
28  
29

## 30 **Methods and analysis**

### 31 *Study objectives*

32 The aim of this trial is to evaluate the safety and efficacy of allogeneic UC-MSC administration in patients with COPD.  
33 There are two specific objectives:  
34  
35  
36  
37

- 38 1. Evaluate the safety and potential therapeutic effectiveness of intravenously (IV) administered UC-MSCs in  
39 patients with COPD.
- 40 2. To prove the hypothesis that IV administration of UC-MSCs can improve lung function and reduce  
41 inflammatory responses in the lungs and fibrosis.
- 42 3. Explore the potential therapeutic mechanism of UC-MSCs in the treatment of COPD.  
43  
44  
45

### 46 *Study design and ethics*

47 This matched case-control phase I/II clinical trial was approved by the Ethical Committee of Vinmec  
48 International Hospital (number: 166/2019/QĐ-VMC) and Vietnam Ministry of Health (number: 2002/QĐ-BYT).  
49 This study was registered at ClinicalTrials.gov (number NCT04433104). To achieve the aims, a total of 40 patients  
50 with COPD will be recruited at the Internal Medicine Department at Vinmec Times City International Hospital, Hanoi,  
51 Vietnam, between June 2020 and December 2021. A flowchart of the study design is shown in Figure 1.  
52  
53  
54  
55

### 56 *Sample size*



1  
2  
3 As a previous study indicated that the mMRC score of COPD patients ranged from 18% to 60% reduction, we  
4 set this rate at 60% reduction to calculate the minimum sample size for the proposed study<sup>18 21</sup>. According to the  
5 dichotomous endpoint of two independent sample studies<sup>22</sup>, we assumed  $\alpha$  was 0.05 and type-II error  $\beta$  was 0.2; thus,  
6 the smallest sample size was 40 patients. The calculated sample size was 20 for each group.  
7  
8

### 9 ***Matching strategy:***

10  
11 The patients from the control group will be assigned to a patient from the MSC group once they meet all  
12 matched criteria based on age ( $\pm 5$  years), gender, and COPD severity classification (GOLD 2019). Patients from both  
13 groups will receive standard COPD medication management according to their COPD severity classification and based  
14 on the Vietnam Ministry of Health guideline for COPD treatment, as shown in Figure 2 and Table 3.  
15  
16  
17

18 A total of 40 patients will be recruited and assigned to the UC-MSA administration group (20 patients) and the  
19 control group (20 patients). The trial contains two phases: (1) the first phase will include recruiting and evaluating the  
20 first 5 patients from each group to assess the safety of UC-MSA administration after 1 month of follow-up, and (2)  
21 the second phase will be initiated after the 1<sup>st</sup> phase safety report is approved by the Ethical Committee of Vinmec  
22 International Hospital and Vietnam Ministry of Health to start recruiting the remaining 15 patients from each group  
23 to evaluate both safety and efficacy of the treatment.  
24  
25  
26

### 27 ***Participants***

28  
29 The principal investigators, research and clinician team members are responsible for the study design, patient  
30 screening, recruitment, conduct, and perform follow-up assessments in the trial. Participants will be allowed to enroll  
31 or withdraw at any time throughout the study. The participants will have all screening and testing costs related to the  
32 trials waived except for the costs of COPD medications or drugs. All participants' information will be protected by  
33 coding and restricted access using a computer-based system. Participants will be enrolled in the study once they meet  
34 all inclusion and exclusion criteria.  
35  
36  
37

### 38 ***Inclusion and exclusion criteria***

39  
40 The diagnostic criteria and severity classification of COPD refers to the criteria established by the COPD 2019  
41 guidelines<sup>20</sup>. Patients will be asked to confirm the COPD conditions and classification from national hospitals and  
42 send the results to the administration office prior to enrollment in the trial for prescreening. Patients will be enrolled  
43 in the study in compliance with the inclusion and exclusion criteria established by a screening protocol as presented  
44 below.  
45  
46  
47

#### 48 ***Inclusion Criteria***

- 49 ▪ Diagnosed with COPD with stage B, C, or D according to GOLD 2019.
- 50 ▪ Age between 40-75 years old.
- 51 ▪ Both genders.

#### 52 ***Exclusion Criteria***

- Smoker or less than 6 months of smoking cessation time.
- Asthma and other pulmonary-related diseases and injuries (including lung tuberculosis, restrictive lung disease, idiopathic pulmonary fibrosis, or lung cancer).
- Acute and/or active infection.
- Cancer.
- Patients with complex cardiovascular diseases (including valvular heart disease, cardiomyopathy, arrhythmia, congenital heart disease, hypertrophy syndrome).
- Liver and kidney failure.
- Pregnancy.
- Patients with life expectancy less than 6 months due to concomitant illness.
- Under immunosuppressive treatment within 8 weeks of the first screening visit.
- Patient diagnosed diabetes with  $HbA_{1C} > 7\%$ .

### ***Recruitment***

Patients can only enroll in this study after passing the prescreening process, consultation resolution, and signing the informed consent form.

The recruitment campaign will target three main sources. First, potentially eligible hospitalized patients diagnosed with severe COPD will be approached and asked to participate in the study. Second, physicians will generate lists of patients from the electronic medical system of Vinmec Times City International Hospital with a diagnosis of COPD based on severity classification matching the GOLD 2019 criteria who were discharged within 2 years. Investigators or physicians will contact patients by telephone or mail them a research leaflet and recruitment letter. Third, leaflet and trial recruitment letters will be posted in the Vingroup cooperation internal email system, the official website, and the Facebook public platform of the Vinmec Healthcare system for those diagnosed with COPD GOLD 2019 (B, C, D) at other hospitals. If the patients are interested in this research, we will ask them to send the prescreen results to the administration office.

A multidisciplinary consultation will be held to evaluate the prescreening results from participants to confirm whether these potential participants meet the general diagnostic criteria of COPD, including inclusion and exclusion criteria. The consultation includes physicians and experts from respiratory, radiology, laboratory, and stem cell biology fields. If more than 80% of experts agree on the prescreening results, patients will be viewed as potential participants. The researchers will set an appointment to communicate with the potential candidates about the clinical trial details, including pros and cons of stem cell treatments and sign the written informed consent form prior to assigning patients to either stem cell administration or control groups.

The details of the clinical trial will be explained to patients by investigators or physicians as follows: (1) the study aims and scope, (2) background of COPD and UC-MSc, (3) number of participants, study duration, and classification into either MSC administration or control group, (4) study procedure (including screening, COPD medication management, follow-up tests), (5) potential discomfort and risks of MSC administration (including

1  
2  
3 prespecified adverse and severe adverse events), (6) expected outcomes of the treatment (primary safety evaluation  
4 and potential therapeutic improvement of both MSC administration and COPD medication management according to  
5 Vietnam Ministry of Health guideline), (7) protection policy of patients' information and privacy, and (8) voluntary  
6 participation (right and responsibility of patients). Patients will only sign written informed consent when all the above  
7 items are fully explained and the patients fully understand the protocol. The patients' baseline characteristics will be  
8 assessed by the clinicians within 30 days prior to UC-MSC administration for patients in the MSC administration  
9 group (Table 1).  
10  
11  
12

### 13 ***Intervention***

14  
15  
16 A single umbilical cord (UC) sample will obtained from healthy women with an uncomplicated, at term  
17 pregnancy who underwent serological testing, including tests for HIV, cytomegalovirus (CMV), Epstein-Barr virus  
18 (EBV), hepatitis A virus (HAV), hepatitis B virus (HBV), hepatitis C virus (HCV), syphilis, and chlamydia, at 38  
19 weeks of pregnancy. The eligible UC tissue will be collected at delivery and transferred to the Stem Cell Core Facility  
20 at the Vinmec Research Institute of Stem Cell and Gene Technology under ISO 14644-1 (certification number:  
21 CR61119-1). The UC tissue will be processed, and the UC-MSCs will be isolated and cultured under xeno-free and  
22 serum-free conditions as previously described. UC-MSCs will be expanded under these conditions to passage 5 (P5)  
23 and cryopreserved in the serum- and xeno-free defined reagent CryoStore® CS10 (Stem Cell Technology, Canada) in  
24 liquid nitrogen (gas phase) in an automated Brooks System (Brooks Life Science, USA) for long-term storage. The  
25 releasing criteria for UC-MSC products are shown in Table 2.  
26  
27  
28  
29  
30

31 To prepare UC-MSCs for therapy, aliquots of P5 UC-MSCs will be thawed in a temperature control water bath  
32 or incubator on the infusion day. The hUC-MSCs will be washed and suspended in 0.9% normal saline. In addition to  
33 inspecting the quality of the UC-MSC product based on the releasing criteria, the staff of the Cell Therapy Department  
34 will confirm the viability and quality of the UC-MSC product before the infusion. The cell dose will be calculated  
35 based on patients' body weight and cell viability results to obtain the dose of  $1 \times 10^6$  viable cells/kg patient body weight  
36 prior to transport to the administration ward. Currently, there is no effective treatment for COPD patients. Thus, the  
37 intervention group will be given the standard COPD medication management as primary treatment and extra UC-  
38 MSC administration, while the control group will receive only the standard COPD treatment (Table 3).  
39  
40  
41  
42

### 43 ***Mode of cell administration (UC-MSC group)***

44  
45 Patients assigned to UC-MSC administration groups will receive two administrations at a dose of 1 million  
46 cells/kg patient bodyweight via the IV route with a 3-month intervening interval. On the day of infusion, thawed cells  
47 at P5 will be prepared to meet the target administration dose based on the number of viable cells in 10 mL of 0.9%  
48 NaCl (Braun, USA) as described above and delivered to the administration ward for infusion at a rate of 20 mL/hour.  
49  
50

### 51 ***Withdrawal***

52  
53  
54 Participant discontinuation may occur upon participant death, severe adverse events (SEAs), other serious  
55 disease-limiting involvement, or a direct request from participant to withdraw from the study. Once the participant  
56  
57

1  
2  
3 withdraws from the study, the reasons for the withdrawal and all recorded results will be documented in detail. New  
4 participants will not be recruited to replace withdrawn participants.  
5

### 6 ***Adverse events (AEs)***

7  
8 AEs are defined as adverse medical events that occur after the patient signs informed consent until completion  
9 of the follow-up period. AEs include abnormal laboratory results, symptoms, or diseases. All AEs will be documented  
10 on a written case report form (CRF) and transferred to a research electronic data capture (RedCap) system. Once AEs  
11 occur, the physician and clinician in charge will follow the necessary treatment according to the patient's condition  
12 and decide whether to suspend clinical research. In terms of severe adverse events (SAEs), the clinician team will  
13 follow the first priority to treat principle and be considered an emergency situation. The principal investigators will  
14 immediately inform the Ethical Committee and Medical Advisory board of Vinmec Times City International Hospital.  
15 Within 24 h, the SAE report should be submitted with full description, while a follow-up SAE report should be  
16 submitted to the Ethical Committee of Vinmec Times City International Hospital. Within the 7 days, the SAE report  
17 with comments from the Ethical Committee will be submitted to the National Ethical Committee of Vietnam Ministry  
18 of Health via post. All participants enrolled in the study will be subjected to an insurance policy that provides ancillary  
19 and posttrial medical care in case of injury or death as a result of their participation in the trial.  
20  
21  
22  
23  
24  
25

### 26 ***Outcome evaluation***

#### 27 ***Primary outcomes (safety)***

28  
29 All required evaluation and laboratory tests with the timeframes are listed in Table 1. To assess safety, the  
30 number of AEs or SAEs during stem cell administration (72 h) at 3 months, 6 months, and 12 months after discharge  
31 will be evaluated. Body temperature, blood pressure, respiratory rate, heart rate, and SpO<sub>2</sub> will be recorded before and  
32 during MSC administration up to 24 h. As mentioned above, the first phase of this study will involve recruiting five  
33 pairs of patients to evaluate the safety prior to initiating the second phase. The safety report of the first phase will  
34 cover one month postdischarge and will be submitted to the Ethical Committee of Vinmec Times City International  
35 Hospital and the National Ethical Committee of Vietnam Ministry of Health for approval of starting the second phase.  
36  
37  
38  
39  
40

41 SAEs include death, any critical cardiac event (new ventricular tachycardia, ventricular fibrillation, or asystole,  
42 cardiac arrest, cardiac hypertrophy), acute pulmonary distress and embolism, stroke, anaphylactic shock, sepsis, and  
43 other conditions that extend the hospital stay. The prespecified AEs include fever, common allergic reactions (rash,  
44 edema, erythema, pallor), infection at the administration site, changes in vital signs, and abnormal laboratory test  
45 results (including hematological analysis and indicators of liver and kidney functions).  
46  
47  
48

#### 49 ***Secondary outcomes (Efficacy)***

50  
51 The efficacy endpoints are as follows: (1) number of admissions and readmissions, (2) general self-efficacy,  
52 (3) the number of admissions and unscheduled outpatient visits due to symptoms of COPD, (3) arterial blood gas  
53 analysis (including pH, PaO<sub>2</sub>, PaCO<sub>2</sub>, BE, HCO<sub>3</sub><sup>-</sup>), (4) respiratory functions (FEV<sub>1</sub>, FEV<sub>1</sub>/FVC, VC, TLC, RV,  
54 DLCO, DLNO/DLCO), (5) electrocardiogram, echocardiography, high-resolution chest computed tomography,  
55  
56  
57

1  
2  
3 abdominal ultrasound, abnormality of thyroid and mammary gland, (6) inflammatory response (CRP, Pro-BNP, and  
4 Troponin-T) and (7) cytokine analysis from patients' plasma. In addition, the modified medical research council  
5 (mMRC) questionnaire and quality of life (Georges Respiratory Questionnaire – SGRQ) will be used to monitor  
6 respiratory function improvement. To reveal the therapeutic effects of UC-MSC administration, UC-MSC  
7 characterization will be conducted *in vitro*, including MSC marker analysis, metabolic evaluation, immunoregulatory  
8 assessment, and cytokine secretion analysis.  
9  
10

### 11 ***Follow-up procedure***

12  
13  
14 Follow-up visits will be conducted at 3, 6, and 12 months after hUC-MSC administration. Patients will be  
15 asked to come to the hospital to undergo an assessment of their conditions according to the protocol procedure. The  
16 safety follow-up will include an extra 1-month follow-up point via telephone and outpatient contact, and patients will  
17 only be asked to make an appointment if AEs or SAEs occur.  
18  
19

### 20 ***Data collection***

21  
22  
23 The data accumulated during the trial will be documented in the patients' medical records and the CRF. The  
24 quality control officers from Vinmec Times City International Hospital and Vinmec Scientific Research Board  
25 independently checked the accuracy and consistency of the CRF data with the original patients' medical records to  
26 ensure that the data were accurately entered into the CRF. Once the CRF is checked, within 7 days, all data will be  
27 recorded to RedCap software by assigned personnel and crosschecked by principle investigators. There are four data  
28 collection points, including baseline and 3 months, 6 months, and 12 months postadministration. The internal auditor  
29 of the Vinmec Research Institute of Stem Cell and Gene Technology will review each original research record to  
30 confirm the accuracy, consistency, timely records, and meet the standard requirements. Data analysis will be  
31 performed using RedCap and statistical analysis software following the statistical analysis strategy  
32 (<https://redcap.vinmec.com/>). The data of this clinical trial will be disseminated with permission from funding bodies  
33 and principle investigators through national and international conferences, peer-reviewed publications, and scientific  
34 reports. A complete data set will be available upon request after trial completion.  
35  
36  
37  
38  
39  
40

### 41 ***Statistical analysis strategy***

42  
43 Descriptive statistics will be used to illustrate the demographics of the COPD patients. Categorical variables  
44 are expressed as proportions, whereas quantitative variables are described as the mean values and their standard  
45 deviations or as the medians and their interquartile ranges. The number and type of adverse events/serious adverse  
46 events will be compared between the two treatment groups using the Chi square (or Fisher's exact) test. For the  
47 intervention and control groups, the indicators (m-MRC, CAT, SGRQ, respiratory functions, and arterial blood gas  
48 analysis) at baseline and at 3 months, 6 months, and 12 months will be compared with repeated measures ANOVA.  
49 P-values < 0.05 will be considered statistically significant. The analyses will be performed using Stata version 14  
50 (StataCorp, College Station, TX, USA).  
51  
52  
53  
54

### 55 ***Ethics and dissemination***

1  
2  
3 This trial, including the consent form and clinical protocol, was approved by the Ethical Committee of Vinmec  
4 International Hospital (number: 166/2019/QĐ-VMEC) and Vietnam Ministry of Health (number: 2002/QĐ-BYT).  
5 This study was registered at ClinicalTrials.gov (number NCT04433104). The trial conforms with the Declaration of  
6 Helsinki. All participants will provide oral and written informed consent prior to participating in the study.  
7  
8

## 9 **Discussion**

10  
11 This study protocol presents the matched-control phase I/II clinical trial evaluating the safety and potential  
12 efficacy of allogeneic UC-MSC administration in patients with moderate-to-severe COPD (GOLD 2019). To date,  
13 there is no effective treatment available for COPD patients, and pharmacological interventions are hampered by the  
14 heterogeneity of disease mechanisms and phenotypic alternation. Therefore, establishing new treatment methods to  
15 reduce the devastating effects of COPD is imperative. The body of preclinical studies and human clinical trials  
16 suggests that MSC administration emerges as a potential therapeutic approach for COPD because MSCs have been  
17 found to be well tolerated and safe in many clinical trials and have proven their effectiveness in animal models.  
18 However, the effectiveness of MSC therapy showed differences among various clinical trials, and a small number of  
19 trials have revealed no significant changes in lung function and fibrosis postadministration compared with baseline  
20 levels<sup>23</sup>. Therefore, it is important to comprehensively analyze the factors that directly contribute to treatment efficacy.  
21  
22

23  
24 Human clinical trials were conducted to evaluate the safety and efficacy of MSCs in the treatment of COPD,  
25 including five studies using bone marrow-derived cells<sup>14-17 19</sup> and a pilot study using UC-MSCs<sup>18</sup>. The first study  
26 supported the safety profile of MSCs administered BMSCs to four COPD patients, although the overall clinical  
27 outcomes did not demonstrate the efficacy of the treatment. It is understandable that studies together with the two  
28 trials (NCT001110252 and NCT01306513) are phase 1 clinical trials that aimed to evaluate the safety and feasibility  
29 of cellular administration in the treatment of COPD. Notably, the NCT001110252 study followed up with patients for  
30 up to 3 years illustrated an overall reduction in the process of COPD pathological development<sup>19</sup>. In a pilot study  
31 using UC-MSCs, COPD patients were followed up for 6 months, and no AEs or SAEs were observed throughout the  
32 course of the study. Although clinical outcomes such as COPD exacerbations, mMRC score, and CAT were  
33 significantly reduced postadministration, pulmonary function parameters remained unchanged compared to baseline  
34<sup>18</sup>. In our current study, we use UC-MSCs as an “off-the-shelf” product for administration, providing flexibility in  
35 patient management and standardized products for all treated patients, allowing more accuracy in evaluation.  
36 Moreover, by using a matched control design, our study aims to eliminate the variability in COPD conditions between  
37 the intervention and control groups to accurately evaluate the safety and efficacy of the treatment. In general, it was  
38 confirmed that MSC administration is well tolerated without serious adverse events or administration-associated  
39 adverse events and is not associated with significant alterations in spirometry, immune function, cardiovascular  
40 activity, or patient quality of life<sup>24</sup>.  
41  
42  
43  
44  
45  
46  
47  
48  
49  
50

51  
52 The major delivery routes of MSCs in the treatment of pulmonary disease include intraperitoneal (usually in  
53 animal models), intranasal or intratracheal, and IV administration. The intratracheal administration of MSCs was  
54 performed in children with bronchopulmonary dysplasia in several small uncontrolled studies. However, in terms of  
55 COPD, all trials utilized IV administration with the aim of investigating whether systemic administration of MSCs is  
56  
57



1  
2  
3 safe and effective in COPD patients. In fact, the IV administration route is considered a better option compared to  
4 intratracheal delivery for several reasons. Previous studies illustrated that IV administration of MSCs was safe and  
5 potentially provided therapeutic effects in several lung diseases, including COPD<sup>15,23</sup>. Moreover, a systemic analysis  
6 of preclinical studies suggested that IV administration of MSCs introduced better effects than those administered via  
7 the intratracheal route<sup>13</sup>. We hypothesized that the results of this clinical trial will provide data supporting that UC-  
8 MSC administration via the IV route is safe, feasible, and potentially effective in COPD patients.  
9  
10

11  
12 The dose-escalating evaluation has been conducted in several clinical trials for various diseases, including  
13 pulmonary syndromes, using a wide range of UC-MSC doses from 0.5 – 10 million cells/kg via IV administration<sup>15</sup>  
14<sup>23,25</sup>. Notably, limited studies have reported the different effects of MSC doses in COPD patients. In fact, a relatively  
15 high dose (10 million cells/kg patient body weight) was tested in ARDS patients without any administration-associated  
16 AEs or SAEs recorded. However, it is important to note that delivery of a high dose of stem cells might increase the  
17 risk of pulmonary embolism and thrombosis regardless of administration route, which was demonstrated previously  
18 in animal models and clinical trials<sup>26-28</sup>. Therefore, in this trial, we used the most common dose of MSCs used in  
19 numerous studies, which is 1 million cells/kg patient body weight.  
20  
21

22  
23 This clinical trial has several advantages. First, this is the first trial using an “off-the-shelf” product (UC-MSCs)  
24 for COPD patients. Second, this is the first trial to investigate the therapeutic effects of UC-MSCs as supplementary  
25 products in combination with standard medication treatments according to the GOLD 2019 recommendation. Third,  
26 if the potential efficacy can be detected throughout the course of our study, our results (including MSC biological  
27 analysis of stem cell characterization, immunoregulation, and metabolism) will strengthen our knowledge and  
28 understanding of UC-MSC effects in COPD and provide a fundamental background for treating patients with  
29 moderate-to-severe COPD. In the case of no therapeutic effect, our data will also provide important insight into the  
30 safety of the treatment and potential alternative approach for MSC therapy of COPD.  
31  
32

### 33 34 35 36 37 38 39 40 41 42 43 44 45 46 47 48 49 50 51 52 53 54 55 56 57 58 59 60

## References

1. Rabe KF, Watz H. Chronic obstructive pulmonary disease. *Lancet* 2017;389(10082):1931-40. doi: 10.1016/S0140-6736(17)31222-9 [published Online First: 2017/05/18]
2. Collaborators GBDCRD. Global, regional, and national deaths, prevalence, disability-adjusted life years, and years lived with disability for chronic obstructive pulmonary disease and asthma, 1990-2015: a systematic analysis for the Global Burden of Disease Study 2015. *Lancet Respir Med* 2017;5(9):691-706. doi: 10.1016/S2213-2600(17)30293-X
3. Ho T, Cusack RP, Chaudhary N, et al. Under- and over-diagnosis of COPD: a global perspective. *Breathe (Sheff)* 2019;15(1):24-35. doi: 10.1183/20734735.0346-2018 [published Online First: 2019/03/07]
4. Nguyen TS, Nguyen TLH, Pham TTV, et al. Impact of pharmaceutical care in the improvement of medication adherence and quality of life for COPD patients in Vietnam. *Respir Med* 2019;153:31-37. doi: 10.1016/j.rmed.2019.05.006

- 1  
2  
3 5. Ngo CQ, Phan DM, Vu GV, et al. Inhaler Technique and Adherence to Inhaled Medications among Patients with  
4 Acute Exacerbation of Chronic Obstructive Pulmonary Disease in Vietnam. *Int J Environ Res Public Health*  
5 2019;16(2) doi: 10.3390/ijerph16020185
- 6  
7 6. Caplan AI. Mesenchymal Stem Cells: Time to Change the Name! *Stem Cells Transl Med* 2017;6(6):1445-51. doi:  
8 10.1002/sctm.17-0051
- 9  
10 7. Viswanathan S, Shi Y, Galipeau J, et al. Mesenchymal stem versus stromal cells: International Society for Cell &  
11 Gene Therapy (ISCT(R)) Mesenchymal Stromal Cell committee position statement on nomenclature.  
12 *Cytotherapy* 2019;21(10):1019-24. doi: 10.1016/j.jcyt.2019.08.002
- 13  
14 8. Dominici M, Le Blanc K, Mueller I, et al. Minimal criteria for defining multipotent mesenchymal stromal cells.  
15 The International Society for Cellular Therapy position statement. *Cytotherapy* 2006;8(4):315-7. doi:  
16 10.1080/14653240600855905
- 17  
18 9. Amable PR, Teixeira MV, Carias RB, et al. Protein synthesis and secretion in human mesenchymal cells derived  
19 from bone marrow, adipose tissue and Wharton's jelly. *Stem Cell Res Ther* 2014;5(2):53. doi: 10.1186/srct442
- 20  
21 10. Qin H, Zhao A. Mesenchymal stem cell therapy for acute respiratory distress syndrome: from basic to clinics.  
22 *Protein Cell* 2020;11(10):707-22. doi: 10.1007/s13238-020-00738-2
- 23  
24 11. Cruz FF, Rocco PRM. The potential of mesenchymal stem cell therapy for chronic lung disease. *Expert Rev Respir*  
25 *Med* 2020;14(1):31-39. doi: 10.1080/17476348.2020.1679628
- 26  
27 12. Mohammadipoor A, Antebi B, Batchinsky AI, et al. Therapeutic potential of products derived from mesenchymal  
28 stem/stromal cells in pulmonary disease. *Respir Res* 2018;19(1):218. doi: 10.1186/s12931-018-0921-x
- 29  
30 13. Eggenhofer E, Benseler V, Kroemer A, et al. Mesenchymal stem cells are short-lived and do not migrate beyond  
31 the lungs after intravenous infusion. *Front Immunol* 2012;3:297. doi: 10.3389/fimmu.2012.00297
- 32  
33 14. Ribeiro-Paes JT, Bilaqui A, Greco OT, et al. Unicentric study of cell therapy in chronic obstructive pulmonary  
34 disease/pulmonary emphysema. *Int J Chron Obstruct Pulmon Dis* 2011;6:63-71. doi:  
35 10.2147/COPD.S15292
- 36  
37 15. Weiss DJ, Casaburi R, Flannery R, et al. A placebo-controlled, randomized trial of mesenchymal stem cells in  
38 COPD. *Chest* 2013;143(6):1590-98. doi: 10.1378/chest.12-2094
- 39  
40 16. de Oliveira HG, Cruz FF, Antunes MA, et al. Combined Bone Marrow-Derived Mesenchymal Stromal Cell  
41 Therapy and One-Way Endobronchial Valve Placement in Patients with Pulmonary Emphysema: A Phase I  
42 Clinical Trial. *Stem Cells Transl Med* 2017;6(3):962-69. doi: 10.1002/sctm.16-0315
- 43  
44 17. Stolk J, Broekman W, Mauad T, et al. A phase I study for intravenous autologous mesenchymal stromal cell  
45 administration to patients with severe emphysema. *QJM* 2016;109(5):331-6. doi: 10.1093/qjmed/hcw001
- 46  
47 18. Le Thi Bich P, Nguyen Thi H, Dang Ngo Chau H, et al. Allogeneic umbilical cord-derived mesenchymal stem  
48 cell transplantation for treating chronic obstructive pulmonary disease: a pilot clinical study. *Stem Cell Res*  
49 *Ther* 2020;11(1):60. doi: 10.1186/s13287-020-1583-4
- 50  
51 19. Stessuk T, Ruiz MA, Greco OT, et al. Phase I clinical trial of cell therapy in patients with advanced chronic  
52 obstructive pulmonary disease: follow-up of up to 3 years. *Rev Bras Hematol Hemoter* 2013;35(5):352-7.  
53 doi: 10.5581/1516-8484.20130113
- 54  
55  
56  
57  
58  
59  
60



- 1  
2  
3 20. Singh D, Agusti A, Anzueto A, et al. Global Strategy for the Diagnosis, Management, and Prevention of Chronic  
4 Obstructive Lung Disease: the GOLD science committee report 2019. *Eur Respir J* 2019;53(5) doi:  
5 10.1183/13993003.00164-2019  
6  
7 21. Kim S, Oh J, Kim YI, et al. Differences in classification of COPD group using COPD assessment test (CAT) or  
8 modified Medical Research Council (mMRC) dyspnea scores: a cross-sectional analyses. *BMC Pulm Med*  
9 2013;13:35. doi: 10.1186/1471-2466-13-35 [published Online First: 2013/06/05]  
10  
11 22. Hsieh FY. Sample size formulae for intervention studies with the cluster as unit of randomization. *Stat Med*  
12 1988;7(11):1195-201. doi: 10.1002/sim.4780071113 [published Online First: 1988/11/01]  
13  
14 23. Wilson JG, Liu KD, Zhuo H, et al. Mesenchymal stem (stromal) cells for treatment of ARDS: a phase 1 clinical  
15 trial. *Lancet Respir Med* 2015;3(1):24-32. doi: 10.1016/S2213-2600(14)70291-7  
16  
17 24. Zhao R, Su Z, Wu J, et al. Serious adverse events of cell therapy for respiratory diseases: a systematic review and  
18 meta-analysis. *Oncotarget* 2017;8(18):30511-23. doi: 10.18632/oncotarget.15426  
19  
20 25. He X, Ai S, Guo W, et al. Umbilical cord-derived mesenchymal stem (stromal) cells for treatment of severe sepsis:  
21 aphase 1 clinical trial. *Transl Res* 2018;199:52-61. doi: 10.1016/j.trsl.2018.04.006  
22  
23 26. Tanaka E, Ogawa Y, Mukai T, et al. Dose-Dependent Effect of Intravenous Administration of Human Umbilical  
24 Cord-Derived Mesenchymal Stem Cells in Neonatal Stroke Mice. *Front Neurol* 2018;9:133. doi:  
25 10.3389/fneur.2018.00133  
26  
27 27. Kansu E. Thrombosis in stem cell transplantation. *Hematology* 2012;17 Suppl 1:S159-62. doi:  
28 10.1179/102453312X13336169156735  
29  
30 28. Jung JW, Kwon M, Choi JC, et al. Familial occurrence of pulmonary embolism after intravenous, adipose tissue-  
31 derived stem cell therapy. *Yonsei Med J* 2013;54(5):1293-6. doi: 10.3349/ymj.2013.54.5.1293  
32  
33

### 34 Acknowledgements

35  
36 The authors would like to thank all patients involved in the study for their trust, understanding, and  
37 willingness. We thank our collaborating clinicians at the Vinmec Health Care System for participating in this study.  
38 We also thank our colleagues at Vinmec High-tech center for their support with the quality control and UC-MSC  
39 experiment set up.  
40  
41

### 42 Contributors:

43  
44 TLN, DMH, and KTN were involved in the design of the study. DMH drafted the manuscripts with critical input from  
45 LNT, KTN, AHN, and BNN. LNT, AHN, and BNN contributed to the standard medical treatment checklist and drug  
46 for all patients. DMH, LNT and AHN are the grant holder and project leader, respectively. All authors reviewed,  
47 edited and approved the final version of the manuscript.  
48  
49

### 50 Funding

51  
52  
53 This work was supported by the Vingroup Scientific Research and Clinical Application Fund (Grant number:  
54 ISC.19.16). The funder has no role in the analysis or preparation of this manuscript.  
55  
56  
57

### Conflicts of Interests

None declared.

### Patient and public involvement

The patients and public were not involved in the design, or conduct, or reporting or dissemination plans of our research.

### Patient consent for publication

Not required

### Figure Legend:

**Figure 1: Schematic of the study.** COPD patients will be screened to enroll in the study. Patients from the control group will be assigned to a patient from the UC-MSc group once they meet all matched criteria based on age ( $\pm 5$  years), gender, and COPD severity classification (GOLD 2019).

**Figure 2: Standard COPD medication treatment for both groups according to GOLD 2019 and Vietnam Ministry of Health Guideline.** Matched COPD patients will be treated using the same treatment based on their GOLD 2019 classification (Groups A, B, C, and D). Group A (not included in this study): a single bronchodilator will be used and based on the clinical assessments and persistence of the symptoms to continue/stop or replace by another bronchodilator. Group B: Single LAMA or LABA will be initially used. If the symptoms are not reduced, a combination of both LAMA and LABA will be applied. Group C: A single LAMA drug will be used for initial treatment. If exacerbations occur, LAMA and LABA combination will be applied as priority. The LAMA + ICS will be applied in specific cases based on clinical assessment, as the ICS has been reported to have severe side effects on lung inflammation. Group D: Should start the treatment with LAMA. If the patient has CAT $>20$ , LABA and LAMA will be used as initial treatment. LABA + ICS will be used as the initial treatment only when the patient has asthma COPD overlap or the patient's eosinophil level  $> 300$ . If exacerbation occurs after the initial treatment, the combination of LAMA, LABA, and ICS should be applied. Additional roflumilast should be used if FEV1  $< 50\%$  and the patient has chronic bronchitis. Macrolide should be used if the patient is a former smoker. The red arrow indicates priority treatment.

**Table 1: Study timeline and clinical procedures during the trial.** \* If the results of the screening phase for UC-  
MSC groups are within 30 days of UC-MSC administration, they will be automatically considered as the baseline  
level.

| Study Procedure                                                  | Prescreening                        | Screening phase*                    | Baseline                            | 3 months                            | 6 months                            | 12 months                           |
|------------------------------------------------------------------|-------------------------------------|-------------------------------------|-------------------------------------|-------------------------------------|-------------------------------------|-------------------------------------|
| UC-MSC administration <sup>1</sup>                               |                                     |                                     | <input checked="" type="checkbox"/> | <input checked="" type="checkbox"/> |                                     |                                     |
| Medication treatment <sup>2</sup>                                |                                     |                                     | <input checked="" type="checkbox"/> | <input checked="" type="checkbox"/> | <input checked="" type="checkbox"/> | <input checked="" type="checkbox"/> |
| Informed consent                                                 |                                     | <input checked="" type="checkbox"/> |                                     |                                     |                                     |                                     |
| Inclusion and exclusion criteria                                 |                                     | <input checked="" type="checkbox"/> |                                     |                                     |                                     |                                     |
| Demographic information                                          |                                     | <input checked="" type="checkbox"/> | <input checked="" type="checkbox"/> |                                     |                                     |                                     |
| Patients' medical reports                                        |                                     | <input checked="" type="checkbox"/> |
| Vital signs <sup>3</sup> /physical examination                   |                                     | <input checked="" type="checkbox"/> |
| COPD assessment                                                  | <input checked="" type="checkbox"/> | <input checked="" type="checkbox"/> |                                     |                                     |                                     |                                     |
| COPD GOLD 2019 classification                                    | <input checked="" type="checkbox"/> | <input checked="" type="checkbox"/> |                                     | <input checked="" type="checkbox"/> | <input checked="" type="checkbox"/> | <input checked="" type="checkbox"/> |
| Hematology analysis <sup>4</sup>                                 | <input checked="" type="checkbox"/> |
| Infectious disease examination/test <sup>5</sup>                 | <input checked="" type="checkbox"/> | <input checked="" type="checkbox"/> | <input checked="" type="checkbox"/> |                                     |                                     |                                     |
| Blood oxygen saturation/arterial blood gas analysis <sup>6</sup> | <input checked="" type="checkbox"/> |
| Chest CT scan                                                    |                                     | <input checked="" type="checkbox"/> | <input checked="" type="checkbox"/> |                                     | <input checked="" type="checkbox"/> | <input checked="" type="checkbox"/> |
| Chest X-ray                                                      |                                     | <input checked="" type="checkbox"/> | <input checked="" type="checkbox"/> |                                     | <input checked="" type="checkbox"/> | <input checked="" type="checkbox"/> |
| Pulmonary function analysis                                      |                                     | <input checked="" type="checkbox"/> |
| Adverse event evaluation                                         |                                     |                                     | <input checked="" type="checkbox"/> | <input checked="" type="checkbox"/> | <input checked="" type="checkbox"/> | <input checked="" type="checkbox"/> |
| Mortality/complications monitoring                               |                                     |                                     | <input checked="" type="checkbox"/> | <input checked="" type="checkbox"/> | <input checked="" type="checkbox"/> | <input checked="" type="checkbox"/> |

<sup>1</sup>: Applies only for the UC-MSC group at baseline and 3 months.

<sup>2</sup>: Treatment medication applies for all testing groups based on patients' COPD classification according to GOLD 2019 guidelines.

1  
2  
3: Vital signs include body temperature, blood pressure, heart rate, respiratory rate, oxygen saturation, and patient  
4 body weight.

5  
6: Hematological analysis included white blood cell count, platelet count, red blood cell count, hemoglobin, percentage  
7 of lymphocytes, neutrophils, monocytes, eosinophils, basophils, C-reactive protein, Pro-BNP, and Troponin-T.

8  
9: Infectious diseases include hepatitis, syphilis, HIV, HBV, and tuberculosis.

10  
11: Blood gas analysis includes pH, PaO<sub>2</sub>, PaCO<sub>2</sub>, BE, HCO<sub>3</sub><sup>-</sup>.

12  
13  
14  
15  
16  
17  
18  
19  
20  
21  
22  
23  
24  
25  
26  
27  
28  
29  
30  
31  
32  
33  
34  
35  
36  
37  
38  
39  
40  
41  
42  
43  
44  
45  
46  
47  
48  
49  
50  
51  
52  
53  
54  
55  
56  
57  
58  
59  
60

For peer review only

**Table 2: Release criteria and stem cell quality control.** To assess the quality of UC-MSCs for administration, a set of release criteria was defined, which included the following: the positive markers (CD73, CD90, and CD105) must be higher than 95%, the negative markers (CD11b, CD19, CD34, CD45, and HLA-DR) must be less than 2%; the cell viability must be higher than 80% with a normal karyotype; and the cell product must be free from microorganism infections and mycoplasma. Immunoregulatory assays will be performed to assess but not consider released criteria.

| Criteria                                             | Testing Method                                                | Released criteria |
|------------------------------------------------------|---------------------------------------------------------------|-------------------|
| <b>Positive markers (%) (median, range)</b>          |                                                               |                   |
| <i>CD73</i>                                          |                                                               | > 95%             |
| <i>CD90</i>                                          | Flow cytometry using the Human MSC                            | > 95%             |
| <i>CD105</i>                                         | Analysis Kit (Becton Dickinson, USA)                          | > 95%             |
| <b>Negative markers (%)</b>                          |                                                               | < 2%              |
| <b>Cell viability (%) (mean <math>\pm</math> SD)</b> | Trypan Blue staining                                          | > 80%             |
| <b>Microorganism tests</b>                           | BacT/Alert® 3D microbial detection System (Biomerieux, USA)   | Negative          |
| <b>Mycoplasma</b>                                    | MycoAlert™ Plus Mycoplasma Detection Kit (Lonza, Switzerland) | Negative          |
| <b>Endotoxin</b>                                     | Endosafe-PTS (Charles River Laboratories)                     | $\leq$ 5 EU/kg    |
| <b>Immunoregulatory assay</b>                        | Flow Cytometry                                                | Not Applicable    |

**Table 3: Standard medication treatment for both groups based on GOLD 2019 guidelines and Vietnam Ministry of Health recommendations.**

| Items                                                                          | COPD GOLD 2019 Group B                                                                    | COPD GOLD 2019 Group C       | COPD GOLD 2019 Group D                                                                                                                       |
|--------------------------------------------------------------------------------|-------------------------------------------------------------------------------------------|------------------------------|----------------------------------------------------------------------------------------------------------------------------------------------|
| <b>Initial treatment</b>                                                       | A long acting bronchodilator (LABA or LAMA)                                               | LAMA                         | LAMA                                                                                                                                         |
| <b>Difficulty in breathing (moderate)</b>                                      | LAMA + LABA                                                                               | LAMA + LABA<br>Or LAMA + ICS | LAMA + LABA<br>ISC/LABA use when: <ul style="list-style-type: none"> <li>▪ Asthma COPD overlap.</li> <li>▪ Eosinophils&gt;300/ul.</li> </ul> |
| <b>Difficulty in breathing (Severe)</b>                                        | LAMA + LABA                                                                               | LAMA + LABA<br>Or LAMA + ICS | LAMA + LABA + ICS                                                                                                                            |
| <b>Name of Drugs use in Standard COPD Medication Treatment for both groups</b> |                                                                                           |                              |                                                                                                                                              |
| <b>SABA</b>                                                                    | Salbutamol, Terbutaline, Fenoterol                                                        |                              |                                                                                                                                              |
| <b>LABA</b>                                                                    | Indacaterol, Bambuterol                                                                   |                              |                                                                                                                                              |
| <b>SAMA</b>                                                                    | Ipratropium                                                                               |                              |                                                                                                                                              |
| <b>LAMA</b>                                                                    | Tiotropium                                                                                |                              |                                                                                                                                              |
| <b>SABA + SAMA</b>                                                             | Ipratropium and salbutamol<br>Ipratropium and fenoterol                                   |                              |                                                                                                                                              |
| <b>LABA + LAMA</b>                                                             | Indacaterol and Glycopyronium<br>Olodaterol and Tiotropium<br>Vilanterol and Umeclidinium |                              |                                                                                                                                              |
| <b>ICS + LABA</b>                                                              | Budesonid and Formoterol<br>Fluticason and Vilanterol<br>Fluticason and Salmeterol        |                              |                                                                                                                                              |
| <b>Antibiotics</b>                                                             | Erythromycin<br>Rofumilast <sup>1</sup>                                                   |                              |                                                                                                                                              |
| <b>Long/short-acting Xanthine</b>                                              | Theophyllin/Theostat                                                                      |                              |                                                                                                                                              |

<sup>1</sup>: Roflumilast was used only when patients' FEV1<50% and had at least 1 admission within 1 year.

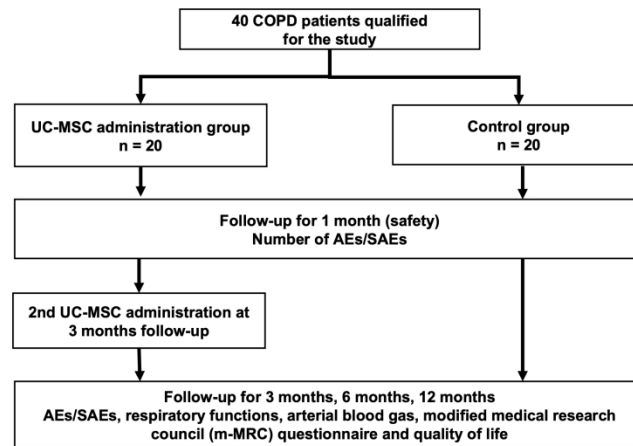

Figure 1

Figure 1: Schematic of the study. COPD patients will be screened to enroll in the study. Patients from the control group will be assigned to a patient from the UC-MSC group once they meet all matched criteria based on age ( $\pm 5$  years), gender, and COPD severity classification (GOLD 2019).

190x275mm (300 x 300 DPI)

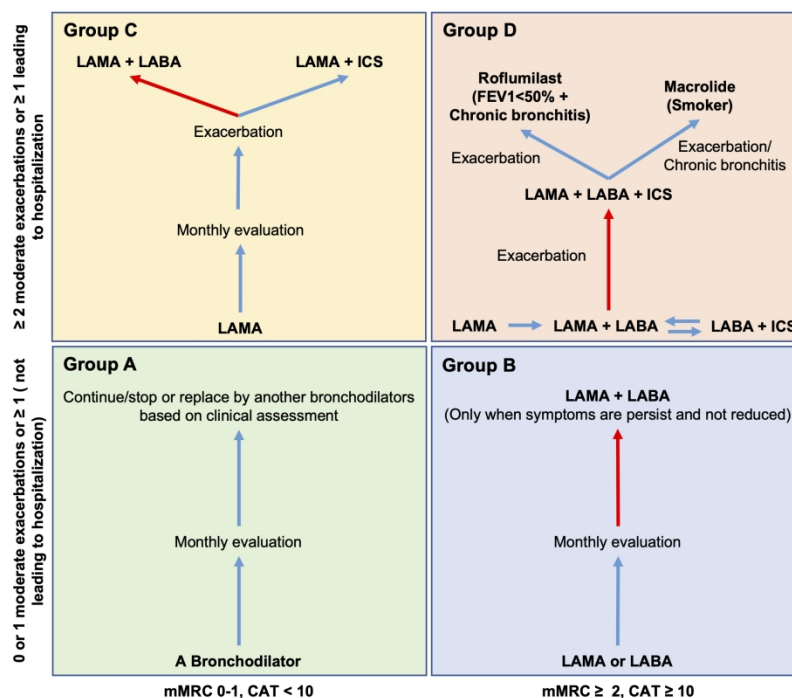

Figure 2:

Figure 2: Standard COPD medication treatment for both groups according to GOLD 2019 and Vietnam Ministry of Health Guideline. Matched COPD patients will be treated using the same treatment based on their GOLD 2019 classification (Groups A, B, C, and D). Group A (not included in this study): a single bronchodilator will be used and based on the clinical assessments and persistence of the symptoms to continue/stop or replace by another bronchodilator. Group B: Single LAMA or LABA will be initially used. If the symptoms are not reduced, a combination of both LAMA and LABA will be applied. Group C: A single LAMA drug will be used for initial treatment. If exacerbations occur, LAMA and LABA combination will be applied as priority. The LAMA + ICS will be applied in specific cases based on clinical assessment, as the ICS has been reported to have severe side effects on lung inflammation. Group D: Should start the treatment with LAMA. If the patient has CAT > 20, LABA and LAMA will be used as initial treatment. LABA + ICS will be used as the initial treatment only when the patient has asthma COPD overlap or the patient's eosinophil level > 300. If exacerbation occurs after the initial treatment, the combination of LAMA, LABA, and ICS should be applied. Additional roflumilast should be used if FEV1 < 50% and the patient has chronic bronchitis. Macrolide should be used if the patient is a former smoker. The red arrow indicates priority



1  
2  
3  
4  
5  
6  
7  
8  
9  
10  
11  
12  
13  
14  
15  
16  
17  
18  
19  
20  
21  
22  
23  
24  
25  
26  
27  
28  
29  
30  
31  
32  
33  
34  
35  
36  
37  
38  
39  
40  
41  
42  
43  
44  
45  
46  
47  
48  
49  
50  
51  
52  
53  
54  
55  
56  
57  
58  
59  
60

treatment.

190x275mm (300 x 300 DPI)

# Reporting checklist for protocol of a clinical trial.

Based on the SPIRIT guidelines.

## Instructions to authors

Complete this checklist by entering the page numbers from your manuscript where readers will find each of the items listed below.

Your article may not currently address all the items on the checklist. Please modify your text to include the missing information. If you are certain that an item does not apply, please write "n/a" and provide a short explanation.

Upload your completed checklist as an extra file when you submit to a journal.

In your methods section, say that you used the SPIRIT reporting guidelines, and cite them as:

Chan A-W, Tetzlaff JM, Gøtzsche PC, Altman DG, Mann H, Berlin J, Dickersin K, Hróbjartsson A, Schulz KF, Parulekar WR, Krleža-Jerić K, Laupacis A, Moher D. SPIRIT 2013 Explanation and Elaboration: Guidance for protocols of clinical trials. *BMJ*. 2013;346:e7586

|                                             |                     | Reporting Item                                                                                               | Page Number |
|---------------------------------------------|---------------------|--------------------------------------------------------------------------------------------------------------|-------------|
| <b>Administrative information</b>           |                     |                                                                                                              |             |
| Title                                       | <a href="#">#1</a>  | Descriptive title identifying the study design, population, interventions, and, if applicable, trial acronym | 1           |
| Trial registration                          | <a href="#">#2a</a> | Trial identifier and registry name. If not yet registered, name of intended registry                         | 2           |
| Trial registration: data set                | <a href="#">#2b</a> | All items from the World Health Organization Trial Registration Data Set                                     | "n/a"       |
| Protocol version                            | <a href="#">#3</a>  | Date and version identifier                                                                                  | 2           |
| Funding                                     | <a href="#">#4</a>  | Sources and types of financial, material, and other support                                                  | 14          |
| Roles and responsibilities: contributorship | <a href="#">#5a</a> | Names, affiliations, and roles of protocol contributors                                                      | 14          |

|    |                           |                     |                                                                    |      |
|----|---------------------------|---------------------|--------------------------------------------------------------------|------|
| 1  | Roles and                 | <a href="#">#5b</a> | Name and contact information for the trial sponsor                 | 14   |
| 2  | responsibilities:         |                     |                                                                    |      |
| 3  | sponsor contact           |                     |                                                                    |      |
| 4  | information               |                     |                                                                    |      |
| 5  |                           |                     |                                                                    |      |
| 6  |                           |                     |                                                                    |      |
| 7  |                           |                     |                                                                    |      |
| 8  | Roles and                 | <a href="#">#5c</a> | Role of study sponsor and funders, if any, in study design;        | 14   |
| 9  | responsibilities:         |                     | collection, management, analysis, and interpretation of data;      |      |
| 10 | sponsor and funder        |                     | writing of the report; and the decision to submit the report for   |      |
| 11 |                           |                     | publication, including whether they will have ultimate authority   |      |
| 12 |                           |                     | over any of these activities                                       |      |
| 13 |                           |                     |                                                                    |      |
| 14 |                           |                     |                                                                    |      |
| 15 |                           |                     |                                                                    |      |
| 16 | Roles and                 | <a href="#">#5d</a> | Composition, roles, and responsibilities of the coordinating       | 14   |
| 17 | responsibilities:         |                     | centre, steering committee, endpoint adjudication committee,       |      |
| 18 | committees                |                     | data management team, and other individuals or groups              |      |
| 19 |                           |                     | overseeing the trial, if applicable (see Item 21a for data         |      |
| 20 |                           |                     | monitoring committee)                                              |      |
| 21 |                           |                     |                                                                    |      |
| 22 |                           |                     |                                                                    |      |
| 23 |                           |                     |                                                                    |      |
| 24 | <b>Introduction</b>       |                     |                                                                    |      |
| 25 |                           |                     |                                                                    |      |
| 26 |                           |                     |                                                                    |      |
| 27 | Background and            | <a href="#">#6a</a> | Description of research question and justification for undertaking | 4    |
| 28 | rationale                 |                     | the trial, including summary of relevant studies (published and    |      |
| 29 |                           |                     | unpublished) examining benefits and harms for each intervention    |      |
| 30 |                           |                     |                                                                    |      |
| 31 |                           |                     |                                                                    |      |
| 32 | Background and            | <a href="#">#6b</a> | Explanation for choice of comparators                              | 4-5  |
| 33 | rationale: choice of      |                     |                                                                    |      |
| 34 | comparators               |                     |                                                                    |      |
| 35 |                           |                     |                                                                    |      |
| 36 |                           |                     |                                                                    |      |
| 37 | Objectives                | <a href="#">#7</a>  | Specific objectives or hypotheses                                  | 5    |
| 38 |                           |                     |                                                                    |      |
| 39 |                           |                     |                                                                    |      |
| 40 | Trial design              | <a href="#">#8</a>  | Description of trial design including type of trial (eg, parallel  | 5, 6 |
| 41 |                           |                     | group, crossover, factorial, single group), allocation ratio, and  |      |
| 42 |                           |                     | framework (eg, superiority, equivalence, non-inferiority,          |      |
| 43 |                           |                     | exploratory)                                                       |      |
| 44 |                           |                     |                                                                    |      |
| 45 |                           |                     |                                                                    |      |
| 46 | <b>Methods:</b>           |                     |                                                                    |      |
| 47 | <b>Participants,</b>      |                     |                                                                    |      |
| 48 | <b>interventions, and</b> |                     |                                                                    |      |
| 49 | <b>outcomes</b>           |                     |                                                                    |      |
| 50 |                           |                     |                                                                    |      |
| 51 |                           |                     |                                                                    |      |
| 52 |                           |                     |                                                                    |      |
| 53 | Study setting             | <a href="#">#9</a>  | Description of study settings (eg, community clinic, academic      | 5, 6 |
| 54 |                           |                     | hospital) and list of countries where data will be collected.      |      |
| 55 |                           |                     | Reference to where list of study sites can be obtained             |      |
| 56 |                           |                     |                                                                    |      |
| 57 |                           |                     |                                                                    |      |
| 58 |                           |                     |                                                                    |      |
| 59 |                           |                     |                                                                    |      |
| 60 |                           |                     |                                                                    |      |

|    |                              |                      |                                                                                                                                                                                                                                                                                                                                                                                |       |
|----|------------------------------|----------------------|--------------------------------------------------------------------------------------------------------------------------------------------------------------------------------------------------------------------------------------------------------------------------------------------------------------------------------------------------------------------------------|-------|
| 1  | Eligibility criteria         | <a href="#">#10</a>  | Inclusion and exclusion criteria for participants. If applicable, eligibility criteria for study centres and individuals who will perform the interventions (eg, surgeons, psychotherapists)                                                                                                                                                                                   | 6,7   |
| 2  |                              |                      |                                                                                                                                                                                                                                                                                                                                                                                |       |
| 3  |                              |                      |                                                                                                                                                                                                                                                                                                                                                                                |       |
| 4  |                              |                      |                                                                                                                                                                                                                                                                                                                                                                                |       |
| 5  |                              |                      |                                                                                                                                                                                                                                                                                                                                                                                |       |
| 6  | Interventions:               | <a href="#">#11a</a> | Interventions for each group with sufficient detail to allow replication, including how and when they will be administered                                                                                                                                                                                                                                                     | 8     |
| 7  | description                  |                      |                                                                                                                                                                                                                                                                                                                                                                                |       |
| 8  |                              |                      |                                                                                                                                                                                                                                                                                                                                                                                |       |
| 9  |                              |                      |                                                                                                                                                                                                                                                                                                                                                                                |       |
| 10 | Interventions:               | <a href="#">#11b</a> | Criteria for discontinuing or modifying allocated interventions for a given trial participant (eg, drug dose change in response to harms, participant request, or improving / worsening disease)                                                                                                                                                                               | 8, 9  |
| 11 | modifications                |                      |                                                                                                                                                                                                                                                                                                                                                                                |       |
| 12 |                              |                      |                                                                                                                                                                                                                                                                                                                                                                                |       |
| 13 |                              |                      |                                                                                                                                                                                                                                                                                                                                                                                |       |
| 14 |                              |                      |                                                                                                                                                                                                                                                                                                                                                                                |       |
| 15 | Interventions:               | <a href="#">#11c</a> | Strategies to improve adherence to intervention protocols, and any procedures for monitoring adherence (eg, drug tablet return; laboratory tests)                                                                                                                                                                                                                              | 8, 9  |
| 16 | adherence                    |                      |                                                                                                                                                                                                                                                                                                                                                                                |       |
| 17 |                              |                      |                                                                                                                                                                                                                                                                                                                                                                                |       |
| 18 |                              |                      |                                                                                                                                                                                                                                                                                                                                                                                |       |
| 19 |                              |                      |                                                                                                                                                                                                                                                                                                                                                                                |       |
| 20 | Interventions:               | <a href="#">#11d</a> | Relevant concomitant care and interventions that are permitted or prohibited during the trial                                                                                                                                                                                                                                                                                  | 8, 9  |
| 21 | concomitant care             |                      |                                                                                                                                                                                                                                                                                                                                                                                |       |
| 22 |                              |                      |                                                                                                                                                                                                                                                                                                                                                                                |       |
| 23 |                              |                      |                                                                                                                                                                                                                                                                                                                                                                                |       |
| 24 | Outcomes                     | <a href="#">#12</a>  | Primary, secondary, and other outcomes, including the specific measurement variable (eg, systolic blood pressure), analysis metric (eg, change from baseline, final value, time to event), method of aggregation (eg, median, proportion), and time point for each outcome. Explanation of the clinical relevance of chosen efficacy and harm outcomes is strongly recommended | 9, 10 |
| 25 |                              |                      |                                                                                                                                                                                                                                                                                                                                                                                |       |
| 26 |                              |                      |                                                                                                                                                                                                                                                                                                                                                                                |       |
| 27 |                              |                      |                                                                                                                                                                                                                                                                                                                                                                                |       |
| 28 |                              |                      |                                                                                                                                                                                                                                                                                                                                                                                |       |
| 29 |                              |                      |                                                                                                                                                                                                                                                                                                                                                                                |       |
| 30 |                              |                      |                                                                                                                                                                                                                                                                                                                                                                                |       |
| 31 |                              |                      |                                                                                                                                                                                                                                                                                                                                                                                |       |
| 32 |                              |                      |                                                                                                                                                                                                                                                                                                                                                                                |       |
| 33 |                              |                      |                                                                                                                                                                                                                                                                                                                                                                                |       |
| 34 | Participant timeline         | <a href="#">#13</a>  | Time schedule of enrolment, interventions (including any run-ins and washouts), assessments, and visits for participants. A schematic diagram is highly recommended (see Figure)                                                                                                                                                                                               | 10    |
| 35 |                              |                      |                                                                                                                                                                                                                                                                                                                                                                                |       |
| 36 |                              |                      |                                                                                                                                                                                                                                                                                                                                                                                |       |
| 37 |                              |                      |                                                                                                                                                                                                                                                                                                                                                                                |       |
| 38 |                              |                      |                                                                                                                                                                                                                                                                                                                                                                                |       |
| 39 |                              |                      |                                                                                                                                                                                                                                                                                                                                                                                |       |
| 40 | Sample size                  | <a href="#">#14</a>  | Estimated number of participants needed to achieve study objectives and how it was determined, including clinical and statistical assumptions supporting any sample size calculations                                                                                                                                                                                          | 5,6   |
| 41 |                              |                      |                                                                                                                                                                                                                                                                                                                                                                                |       |
| 42 |                              |                      |                                                                                                                                                                                                                                                                                                                                                                                |       |
| 43 |                              |                      |                                                                                                                                                                                                                                                                                                                                                                                |       |
| 44 |                              |                      |                                                                                                                                                                                                                                                                                                                                                                                |       |
| 45 | Recruitment                  | <a href="#">#15</a>  | Strategies for achieving adequate participant enrolment to reach target sample size                                                                                                                                                                                                                                                                                            | 7,8   |
| 46 |                              |                      |                                                                                                                                                                                                                                                                                                                                                                                |       |
| 47 |                              |                      |                                                                                                                                                                                                                                                                                                                                                                                |       |
| 48 |                              |                      |                                                                                                                                                                                                                                                                                                                                                                                |       |
| 49 | <b>Methods: Assignment</b>   |                      |                                                                                                                                                                                                                                                                                                                                                                                |       |
| 50 | <b>of interventions (for</b> |                      |                                                                                                                                                                                                                                                                                                                                                                                |       |
| 51 | <b>controlled trials)</b>    |                      |                                                                                                                                                                                                                                                                                                                                                                                |       |
| 52 |                              |                      |                                                                                                                                                                                                                                                                                                                                                                                |       |
| 53 |                              |                      |                                                                                                                                                                                                                                                                                                                                                                                |       |
| 54 | Allocation: sequence         | <a href="#">#16a</a> | Method of generating the allocation sequence (eg, computer-generated random numbers), and list of any factors for stratification. To reduce predictability of a random sequence, details of any planned restriction (eg, blocking) should be                                                                                                                                   | "n/a" |
| 55 | generation                   |                      |                                                                                                                                                                                                                                                                                                                                                                                |       |
| 56 |                              |                      |                                                                                                                                                                                                                                                                                                                                                                                |       |
| 57 |                              |                      |                                                                                                                                                                                                                                                                                                                                                                                |       |
| 58 |                              |                      |                                                                                                                                                                                                                                                                                                                                                                                |       |
| 59 |                              |                      |                                                                                                                                                                                                                                                                                                                                                                                |       |
| 60 |                              |                      |                                                                                                                                                                                                                                                                                                                                                                                |       |

provided in a separate document that is unavailable to those who enrol participants or assign interventions

|    |                        |                      |                                                                     |
|----|------------------------|----------------------|---------------------------------------------------------------------|
| 1  |                        |                      |                                                                     |
| 2  |                        |                      |                                                                     |
| 3  |                        |                      |                                                                     |
| 4  | Allocation             | <a href="#">#16b</a> | Mechanism of implementing the allocation sequence (eg, central      |
| 5  | concealment            |                      | telephone; sequentially numbered, opaque, sealed envelopes),        |
| 6  |                        |                      | describing any steps to conceal the sequence until interventions    |
| 7  | mechanism              |                      | are assigned                                                        |
| 8  |                        |                      |                                                                     |
| 9  |                        |                      |                                                                     |
| 10 |                        |                      |                                                                     |
| 11 | Allocation:            | <a href="#">#16c</a> | Who will generate the allocation sequence, who will enrol           |
| 12 | implementation         |                      | participants, and who will assign participants to interventions     |
| 13 |                        |                      |                                                                     |
| 14 | Blinding (masking)     | <a href="#">#17a</a> | Who will be blinded after assignment to interventions (eg, trial    |
| 15 |                        |                      | participants, care providers, outcome assessors, data analysts),    |
| 16 |                        |                      | and how                                                             |
| 17 |                        |                      |                                                                     |
| 18 |                        |                      |                                                                     |
| 19 |                        |                      |                                                                     |
| 20 | Blinding (masking):    | <a href="#">#17b</a> | If blinded, circumstances under which unblinding is permissible,    |
| 21 | emergency unblinding   |                      | and procedure for revealing a participant's allocated intervention  |
| 22 |                        |                      | during the trial                                                    |
| 23 |                        |                      |                                                                     |
| 24 |                        |                      |                                                                     |
| 25 | <b>Methods: Data</b>   |                      |                                                                     |
| 26 | <b>collection,</b>     |                      |                                                                     |
| 27 | <b>management, and</b> |                      |                                                                     |
| 28 | <b>analysis</b>        |                      |                                                                     |
| 29 |                        |                      |                                                                     |
| 30 |                        |                      |                                                                     |
| 31 |                        |                      |                                                                     |
| 32 | Data collection plan   | <a href="#">#18a</a> | Plans for assessment and collection of outcome, baseline, and       |
| 33 |                        |                      | other trial data, including any related processes to promote data   |
| 34 |                        |                      | quality (eg, duplicate measurements, training of assessors) and a   |
| 35 |                        |                      | description of study instruments (eg, questionnaires, laboratory    |
| 36 |                        |                      | tests) along with their reliability and validity, if known.         |
| 37 |                        |                      | Reference to where data collection forms can be found, if not in    |
| 38 |                        |                      | the protocol                                                        |
| 39 |                        |                      |                                                                     |
| 40 |                        |                      |                                                                     |
| 41 |                        |                      |                                                                     |
| 42 |                        |                      |                                                                     |
| 43 | Data collection plan:  | <a href="#">#18b</a> | Plans to promote participant retention and complete follow-up,      |
| 44 | retention              |                      | including list of any outcome data to be collected for participants |
| 45 |                        |                      | who discontinue or deviate from intervention protocols              |
| 46 |                        |                      |                                                                     |
| 47 |                        |                      |                                                                     |
| 48 | Data management        | <a href="#">#19</a>  | Plans for data entry, coding, security, and storage, including any  |
| 49 |                        |                      | related processes to promote data quality (eg, double data entry;   |
| 50 |                        |                      | range checks for data values). Reference to where details of data   |
| 51 |                        |                      | management procedures can be found, if not in the protocol          |
| 52 |                        |                      |                                                                     |
| 53 |                        |                      |                                                                     |
| 54 |                        |                      |                                                                     |
| 55 | Statistics: outcomes   | <a href="#">#20a</a> | Statistical methods for analysing primary and secondary             |
| 56 |                        |                      | outcomes. Reference to where other details of the statistical       |
| 57 |                        |                      | analysis plan can be found, if not in the protocol                  |
| 58 |                        |                      |                                                                     |
| 59 |                        |                      |                                                                     |
| 60 |                        |                      |                                                                     |

|    |                            |                      |                                                                    |        |
|----|----------------------------|----------------------|--------------------------------------------------------------------|--------|
| 1  | Statistics: additional     | <a href="#">#20b</a> | Methods for any additional analyses (eg, subgroup and adjusted     | 10     |
| 2  | analyses                   |                      | analyses)                                                          |        |
| 3  |                            |                      |                                                                    |        |
| 4  | Statistics: analysis       | <a href="#">#20c</a> | Definition of analysis population relating to protocol non-        | 10     |
| 5  | population and missing     |                      | adherence (eg, as randomised analysis), and any statistical        |        |
| 6  | data                       |                      | methods to handle missing data (eg, multiple imputation)           |        |
| 7  |                            |                      |                                                                    |        |
| 8  |                            |                      |                                                                    |        |
| 9  |                            |                      |                                                                    |        |
| 10 | <b>Methods: Monitoring</b> |                      |                                                                    |        |
| 11 |                            |                      |                                                                    |        |
| 12 | Data monitoring:           | <a href="#">#21a</a> | Composition of data monitoring committee (DMC); summary of         | 10     |
| 13 | formal committee           |                      | its role and reporting structure; statement of whether it is       |        |
| 14 |                            |                      | independent from the sponsor and competing interests; and          |        |
| 15 |                            |                      | reference to where further details about its charter can be found, |        |
| 16 |                            |                      | if not in the protocol. Alternatively, an explanation of why a     |        |
| 17 |                            |                      | DMC is not needed                                                  |        |
| 18 |                            |                      |                                                                    |        |
| 19 |                            |                      |                                                                    |        |
| 20 |                            |                      |                                                                    |        |
| 21 |                            |                      |                                                                    |        |
| 22 | Data monitoring:           | <a href="#">#21b</a> | Description of any interim analyses and stopping guidelines,       | 10     |
| 23 | interim analysis           |                      | including who will have access to these interim results and make   |        |
| 24 |                            |                      | the final decision to terminate the trial                          |        |
| 25 |                            |                      |                                                                    |        |
| 26 |                            |                      |                                                                    |        |
| 27 | Harms                      | <a href="#">#22</a>  | Plans for collecting, assessing, reporting, and managing solicited | 9      |
| 28 |                            |                      | and spontaneously reported adverse events and other unintended     |        |
| 29 |                            |                      | effects of trial interventions or trial conduct                    |        |
| 30 |                            |                      |                                                                    |        |
| 31 |                            |                      |                                                                    |        |
| 32 |                            |                      |                                                                    |        |
| 33 | Auditing                   | <a href="#">#23</a>  | Frequency and procedures for auditing trial conduct, if any, and   | 9, 10  |
| 34 |                            |                      | whether the process will be independent from investigators and     |        |
| 35 |                            |                      | the sponsor                                                        |        |
| 36 |                            |                      |                                                                    |        |
| 37 |                            |                      |                                                                    |        |
| 38 | <b>Ethics and</b>          |                      |                                                                    |        |
| 39 | <b>dissemination</b>       |                      |                                                                    |        |
| 40 |                            |                      |                                                                    |        |
| 41 |                            |                      |                                                                    |        |
| 42 | Research ethics            | <a href="#">#24</a>  | Plans for seeking research ethics committee / institutional review | 10     |
| 43 | approval                   |                      | board (REC / IRB) approval                                         |        |
| 44 |                            |                      |                                                                    |        |
| 45 |                            |                      |                                                                    |        |
| 46 | Protocol amendments        | <a href="#">#25</a>  | Plans for communicating important protocol modifications (eg,      | 10, 11 |
| 47 |                            |                      | changes to eligibility criteria, outcomes, analyses) to relevant   |        |
| 48 |                            |                      | parties (eg, investigators, REC / IRBs, trial participants, trial  |        |
| 49 |                            |                      | registries, journals, regulators)                                  |        |
| 50 |                            |                      |                                                                    |        |
| 51 |                            |                      |                                                                    |        |
| 52 |                            |                      |                                                                    |        |
| 53 | Consent or assent          | <a href="#">#26a</a> | Who will obtain informed consent or assent from potential trial    | 5, 6   |
| 54 |                            |                      | participants or authorised surrogates, and how (see Item 32)       |        |
| 55 |                            |                      |                                                                    |        |
| 56 |                            |                      |                                                                    |        |
| 57 |                            |                      |                                                                    |        |
| 58 |                            |                      |                                                                    |        |
| 59 |                            |                      |                                                                    |        |
| 60 |                            |                      |                                                                    |        |

|    |                          |                      |                                                                      |         |
|----|--------------------------|----------------------|----------------------------------------------------------------------|---------|
| 1  | Consent or assent:       | <a href="#">#26b</a> | Additional consent provisions for collection and use of              | 5,6     |
| 2  | ancillary studies        |                      | participant data and biological specimens in ancillary studies, if   |         |
| 3  |                          |                      | applicable                                                           |         |
| 4  |                          |                      |                                                                      |         |
| 5  |                          |                      |                                                                      |         |
| 6  | Confidentiality          | <a href="#">#27</a>  | How personal information about potential and enrolled                | 10      |
| 7  |                          |                      | participants will be collected, shared, and maintained in order to   |         |
| 8  |                          |                      | protect confidentiality before, during, and after the trial          |         |
| 9  |                          |                      |                                                                      |         |
| 10 |                          |                      |                                                                      |         |
| 11 | Declaration of interests | <a href="#">#28</a>  | Financial and other competing interests for principal investigators  | 14      |
| 12 |                          |                      | for the overall trial and each study site                            |         |
| 13 |                          |                      |                                                                      |         |
| 14 |                          |                      |                                                                      |         |
| 15 | Data access              | <a href="#">#29</a>  | Statement of who will have access to the final trial dataset, and    | 10      |
| 16 |                          |                      | disclosure of contractual agreements that limit such access for      |         |
| 17 |                          |                      | investigators                                                        |         |
| 18 |                          |                      |                                                                      |         |
| 19 |                          |                      |                                                                      |         |
| 20 | Ancillary and post trial | <a href="#">#30</a>  | Provisions, if any, for ancillary and post-trial care, and for       | "n/a"   |
| 21 | care                     |                      | compensation to those who suffer harm from trial participation       |         |
| 22 |                          |                      |                                                                      |         |
| 23 |                          |                      |                                                                      |         |
| 24 | Dissemination policy:    | <a href="#">#31a</a> | Plans for investigators and sponsor to communicate trial results     | 10      |
| 25 | trial results            |                      | to participants, healthcare professionals, the public, and other     |         |
| 26 |                          |                      | relevant groups (eg, via publication, reporting in results           |         |
| 27 |                          |                      | databases, or other data sharing arrangements), including any        |         |
| 28 |                          |                      | publication restrictions                                             |         |
| 29 |                          |                      |                                                                      |         |
| 30 |                          |                      |                                                                      |         |
| 31 |                          |                      |                                                                      |         |
| 32 |                          |                      |                                                                      |         |
| 33 | Dissemination policy:    | <a href="#">#31b</a> | Authorship eligibility guidelines and any intended use of            | 14      |
| 34 | authorship               |                      | professional writers                                                 |         |
| 35 |                          |                      |                                                                      |         |
| 36 |                          |                      |                                                                      |         |
| 37 | Dissemination policy:    | <a href="#">#31c</a> | Plans, if any, for granting public access to the full protocol,      | "n/a"   |
| 38 | reproducible research    |                      | participant-level dataset, and statistical code                      |         |
| 39 |                          |                      |                                                                      |         |
| 40 |                          |                      |                                                                      |         |
| 41 | <b>Appendices</b>        |                      |                                                                      |         |
| 42 |                          |                      |                                                                      |         |
| 43 | Informed consent         | <a href="#">#32</a>  | Model consent form and other related documentation given to          | "n/a"   |
| 44 | materials                |                      | participants and authorised surrogates                               |         |
| 45 |                          |                      |                                                                      |         |
| 46 |                          |                      |                                                                      |         |
| 47 | Biological specimens     | <a href="#">#33</a>  | Plans for collection, laboratory evaluation, and storage of          | Table 2 |
| 48 |                          |                      | biological specimens for genetic or molecular analysis in the        |         |
| 49 |                          |                      | current trial and for future use in ancillary studies, if applicable |         |
| 50 |                          |                      |                                                                      |         |
| 51 |                          |                      |                                                                      |         |

The SPIRIT checklist is distributed under the terms of the Creative Commons Attribution License CC-BY-ND 3.0. This checklist was completed on 12. October 2020 using <https://www.goodreports.org/>, a tool made by the [EQUATOR Network](#) in collaboration with [Penelope.ai](#)

# BMJ Open

## Allogeneic human umbilical cord-derived mesenchymal stem/stromal cells for chronic obstructive pulmonary disease (COPD): study protocol for a matched case-control, phase I/II trial

|                                 |                                                                                                                                                                                                                                                                                                                                                                                                                                                                                                                                                                                     |
|---------------------------------|-------------------------------------------------------------------------------------------------------------------------------------------------------------------------------------------------------------------------------------------------------------------------------------------------------------------------------------------------------------------------------------------------------------------------------------------------------------------------------------------------------------------------------------------------------------------------------------|
| Journal:                        | <i>BMJ Open</i>                                                                                                                                                                                                                                                                                                                                                                                                                                                                                                                                                                     |
| Manuscript ID                   | bmjopen-2020-045788.R1                                                                                                                                                                                                                                                                                                                                                                                                                                                                                                                                                              |
| Article Type:                   | Protocol                                                                                                                                                                                                                                                                                                                                                                                                                                                                                                                                                                            |
| Date Submitted by the Author:   | 27-Feb-2021                                                                                                                                                                                                                                                                                                                                                                                                                                                                                                                                                                         |
| Complete List of Authors:       | Hoang, Duc M.; Vinmec Health Care System, Vinmec Research Institute of Stem Cell and Gene Technology, Cellular Manufacturing Department<br>Nguyen, Kien T.; Vinmec Health Care System, Vinmec Research Institute of Stem Cell and Gene Technology, Scientific Research Department<br>Nguyen, Anh H.; Vinmec Times City International Hospital, Department of Internal Medicine<br>Nguyen, Bach N.; Vinmec Times City International Hospital, Department of Internal Medicine<br>Nguyen, Liem; Vinmec Health Care System, Vinmec Research Institute of Stem Cell and Gene Technology |
| <b>Primary Subject Heading</b>: | Respiratory medicine                                                                                                                                                                                                                                                                                                                                                                                                                                                                                                                                                                |
| Secondary Subject Heading:      | Research methods                                                                                                                                                                                                                                                                                                                                                                                                                                                                                                                                                                    |
| Keywords:                       | Transplant medicine < INTERNAL MEDICINE, RESPIRATORY MEDICINE (see Thoracic Medicine), Chronic airways disease < THORACIC MEDICINE                                                                                                                                                                                                                                                                                                                                                                                                                                                  |
|                                 |                                                                                                                                                                                                                                                                                                                                                                                                                                                                                                                                                                                     |

SCHOLARONE™  
Manuscripts





I, the Submitting Author has the right to grant and does grant on behalf of all authors of the Work (as defined in the below author licence), an exclusive licence and/or a non-exclusive licence for contributions from authors who are: i) UK Crown employees; ii) where BMJ has agreed a CC-BY licence shall apply, and/or iii) in accordance with the terms applicable for US Federal Government officers or employees acting as part of their official duties; on a worldwide, perpetual, irrevocable, royalty-free basis to BMJ Publishing Group Ltd ("BMJ") its licensees and where the relevant Journal is co-owned by BMJ to the co-owners of the Journal, to publish the Work in this journal and any other BMJ products and to exploit all rights, as set out in our [licence](#).

The Submitting Author accepts and understands that any supply made under these terms is made by BMJ to the Submitting Author unless you are acting as an employee on behalf of your employer or a postgraduate student of an affiliated institution which is paying any applicable article publishing charge ("APC") for Open Access articles. Where the Submitting Author wishes to make the Work available on an Open Access basis (and intends to pay the relevant APC), the terms of reuse of such Open Access shall be governed by a Creative Commons licence – details of these licences and which [Creative Commons](#) licence will apply to this Work are set out in our licence referred to above.

Other than as permitted in any relevant BMJ Author's Self Archiving Policies, I confirm this Work has not been accepted for publication elsewhere, is not being considered for publication elsewhere and does not duplicate material already published. I confirm all authors consent to publication of this Work and authorise the granting of this licence.

1  
2  
3 **Allogeneic human umbilical cord-derived mesenchymal stem/stromal cells for chronic obstructive pulmonary**  
4 **disease (COPD): study protocol for a matched case-control, phase I/II trial.**  
5

6 Duc M. Hoang<sup>1\*</sup>, Kien T. Nguyen<sup>1\*</sup>, Anh H. Nguyen<sup>2</sup>, Bach N. Nguyen<sup>2</sup>, Liem Nguyen Thanh<sup>\*1</sup>.  
7

8 \*These authors contributed equally to the work.  
9

10 <sup>1</sup>Vinmec Research Institute of Stem Cell and Gene Technology, Hanoi, Vietnam.  
11

12 <sup>2</sup> Department of Internal Medicine, Vinmec Times City International Hospital, Hanoi, Vietnam.  
13

14 Correspondence to: Dr Duc M. Hoang. Email: [v.duchm3@vinmec.com](mailto:v.duchm3@vinmec.com), Department of Cellular Manufacturing,  
15 Vinmec Research Institute of Stem Cell and Gene Technology, Vinmec Health Care System, Hanoi, Vietnam.  
16  
17

18  
19 **Keywords:** Umbilical cord-derived Mesenchymal Stem/stromal Cells, Chronic Obstructive Pulmonary Disease  
20 (COPD), allogeneic MSC administration, clinical trial.  
21  
22

23 **Word count:** 4282 words  
24  
25  
26  
27  
28  
29  
30  
31  
32  
33  
34  
35  
36  
37  
38  
39  
40  
41  
42  
43  
44  
45  
46  
47  
48  
49  
50  
51  
52  
53  
54  
55  
56  
57  
58  
59  
60

1  
2  
3 **1 Abstract**

4  
5 **2 Introduction**

6  
7  
8  
9  
10  
11  
12  
13  
14  
15  
16  
17  
18  
19  
20  
21  
22  
23  
24  
25  
26  
27  
28  
29  
30  
31  
32  
33  
34  
35  
36  
37  
38  
39  
40  
41  
42  
43  
44  
45  
46  
47  
48  
49  
50  
51  
52  
53  
54  
55  
56  
57  
58  
59  
60

3 The global prevalence of chronic obstructive pulmonary disease (COPD) is increasing, and it has become a  
4 major public health burden worldwide, including in Vietnam. A large body of preclinical and clinical studies  
5 supports the safety of mesenchymal stem/stromal cells (MSCs) in the treatment of lung injury, including COPD. The  
6 aim of this trial is to investigate the safety and potential therapeutic efficacy of allogeneic administration of  
7 umbilical cord-derived MSCs (UC-MSCs) as a supplementary intervention in combination with standard COPD  
8 medication treatments in patients with moderate-to-severe COPD based on the Global Initiative for Chronic  
9 Obstructive Lung Disease (GOLD) 2019 and Vietnam Ministry of Health's guidelines.

10 **Methods and analysis**

11  
12  
13  
14  
15  
16  
17  
18  
19  
20  
21  
22  
23  
24  
25  
26  
27  
28  
29  
30  
31  
32  
33  
34  
35  
36  
37  
38  
39  
40  
41  
42  
43  
44  
45  
46  
47  
48  
49  
50  
51  
52  
53  
54  
55  
56  
57  
58  
59  
60

11 This matched case-control phase I/II trial is conducted at Vinmec Times City International Hospital, Hanoi,  
12 Vietnam between June 2020 and December 2021. In this study, 40 patients will be enrolled and assigned into two  
13 age-, gender- and COPD condition-matched groups, including a UC-MSC group and a control group. Both groups  
14 will receive standard COPD medication treatment based on the GOLD 2019 guidelines and the Vietnam Ministry of  
15 Health protocol. The UC-MSC group will receive two doses of thawed UC-MSC product with an intervention  
16 interval of 3 months. The primary outcome measures will include the incidence of prespecified administration-  
17 associated adverse events (AEs) and serious adverse events (SAEs). The efficacy will be evaluated based on the  
18 absolute changes in the number of admissions, arterial blood gas analysis, lung function and lung fibrosis via CT  
19 scan and chest X-ray. The clinical evaluation will be conducted at baseline and 3, 6, and 12 months post  
20 intervention.

21 **Ethics and dissemination**

22  
23  
24  
25  
26  
27  
28  
29  
30  
31  
32  
33  
34  
35  
36  
37  
38  
39  
40  
41  
42  
43  
44  
45  
46  
47  
48  
49  
50  
51  
52  
53  
54  
55  
56  
57  
58  
59  
60

22 Ethical approval was secured from the Ethical Committee of Vinmec International Hospital  
23 (number:166/2019/QĐ-VMC) and Vietnam Ministry of Health (number:2002/QĐ-BYT). The results will be  
24 reported to trial collaborators, publication in peer-reviewed academic journals.

25 **Trial registration number:**NCT04433104.  
26

### Strengths and Limitations

- This project is the first matched case-control phase I/II study to evaluate the safety and efficacy of allogeneic administration of UC-MSCs as supplementary treatment in combination with standard medication treatments for patients with moderate-to-severe COPD.
- To address the challenge of evaluating the effectiveness of MSC treatment in COPD by using quantitative and qualitative research methods.
- To interlink the treatment effectiveness with stem cell phenotype analysis to broaden our understanding of UC-MSC effects in COPD.
- The limitation of this study is that it was not conducted as a randomized control trial due to the complexity of the process and patient recruitment as well as the challenges of undertaking clinical trials in COPD patients due to the heterogeneity of disease mechanisms and phenotypic expression.

## 1 Introduction

2 Chronic obstructive pulmonary disease (COPD) is described – but not defined – as one of the major chronic  
3 lung diseases characterized by persistent and progressive airflow obstruction. It is caused by an elevated chronic  
4 pulmonary inflammatory response in the airways and bronchial structure to noxious particles or gases. The  
5 pathological hallmarks of the disease include obstructive bronchiolitis, emphysema, and mucus hypersecretion<sup>1</sup>.  
6 Despite many medical advancements and technological improvements, our understanding of the pathological  
7 mechanisms underlying the progressive and detrimental development of COPD remains incomplete, the definition of  
8 the disease is controversial, diagnostic tests are inaccurate and unstandardized, and the treatment is inadequate<sup>2</sup>. A  
9 recent report stated that the global prevalence of COPD increased by 44% within the last 20 years, and more than 3.2  
10 million patients died each year from COPD worldwide (accounting for approximately 5% of all deaths globally per  
11 year)<sup>3</sup>. In Vietnam, according to the WHO report, 7.1% of males and 1.9% of females aged 40 and above are diagnosed  
12 with COPD. Consequently, approximately 25% of hospital beds in respiratory wards are required for COPD patients,  
13 resulting in a heavy burden to Vietnamese Medical Infrastructure and reducing patients' health and quality of life<sup>4</sup>.  
14 The current pharmacological medications for COPD include the use of inhaled bronchodilator drugs, such as long-  
15 acting  $\beta$  agonists (LABAs) and long-acting muscarinic antagonists (LAMAs), the use of inhaled corticosteroids (ICSs)  
16 or a combination of these medications. Although it is generally accepted that pharmacological interventions via  
17 inhalation would allow the accurate delivery of drugs and increase the clinical benefits, incorrect inhaler technique  
18 and a lack of adherence when feeling healthy caused worse dyspnea, impaired health condition, and increased the  
19 frequency of exacerbations and hospitalizations in Vietnamese COPD patients<sup>5</sup>. Therefore, identifying novel effective  
20 therapies for COPD patients is urgent and important.

21 Since their first discovery in 1968, mesenchymal stem/stromal cells (MSCs) have been intensively studied  
22 because of their therapeutic and regenerative features. The nomenclature of MSCs has been debated recently due to  
23 not only the biological features of the MSCs themselves but also the medical abuse of the term “stem cells” inferring  
24 direct medical benefit<sup>6</sup>. To standardize the characterization of MSCs and facilitate their therapeutic implications, the  
25 International Society for Cellular Therapy (ISCT) has proposed the minimum criteria to define human MSCs<sup>7,8</sup>. In  
26 our study, MSCs were defined as mesenchymal stem/stromal cells, which are a class of adult mesenchymal progenitor  
27 cells derived from either bone marrow, adipose, or umbilical cord tissue and met the minimum criteria of ISCT.  
28 Among various sources of MSCs, human umbilical cord-derived MSCs (hUC-MSCs) are potentially more advanced  
29 than their adult counterparts (bone marrow or adipose) for several reasons: (1) ease of collection as it is a noninvasive  
30 process, (2) waiving ethical barriers as UC is medical waste discarded at birth, (3) rapid proliferation rate, (4)  
31 maintenance of normal karyotype during prolonged culture *in vitro*, and (4) higher paracrine potency than adult tissue-  
32 derived MSCs<sup>9</sup>. The therapeutic potential of hUC-MSCs has been proven in clinical studies, especially animal  
33 pulmonary disease models, including acute respiratory distress syndrome (ARDS), bronchopulmonary dysplasia  
34 (BPD), and COPD. It has been reported that UC-MSCs are effective in reducing lung inflammation and fibrosis  
35 processes, preventing secondary infection, decreasing immune system damage, increasing bronchoalveolar fluid  
36 clearance, and enhancing the regeneration of alveolar epithelium layers<sup>10-12</sup>. The majority of intravenously

1 administered MSCs reportedly remain in the lung, especially pulmonary microvessels, which potentially contribute to  
2 their beneficial effects in pulmonary disease models<sup>13</sup>. Hence, the safety and therapeutic effects of UC-MSC  
3 administration for COPD require further investigation and clarification.

4 To date, five completed clinical trials have used bone marrow mononuclear cells (BMMCs), bone marrow-  
5 derived MSCs (BM-MSCs), and UC-MSCs in COPD<sup>14-19</sup>. Although these clinical trials provided an enormous amount  
6 of data supporting the safety of the therapy in the treatment of COPDs, the efficacy of the treatments remained  
7 controversial due to several limitations, including trial design, lack of standardization of cell numbers administered to  
8 patients, timing of MSC administration, and, most importantly, the lack of a control group in several studies. Moreover,  
9 the variations in patient selection based on the severity and stage of COPD could be attributed to the effectiveness of  
10 the cell therapy, resulting in caution in data interpretation. Last but not least, the quality of administered MSCs also  
11 plays a significant role in the effectiveness of the treatment, i.e., the status of the cells (fresh culture vs. frozen cells),  
12 cell sources (from young healthy donors or aging individuals), dosage frequency, etc. Therefore, identification of the  
13 potential sources of MSCs (such as UC-MSCs), larger sample size with matched controls, and standardized  
14 classification of COPD using international accepted criteria is required to further investigate the safety and efficacy  
15 of MSC therapy. Based on preclinical studies and previous promising findings, we designed a matched control phase  
16 I/II clinical trial to evaluate the safety and potential efficacy of the intravenous infusion of allogeneic hUC-MSCs in  
17 patients with COPD characterized based on the Global Initiative for Chronic Obstructive Lung Disease (GOLD) 2019  
18 criteria<sup>20</sup>.

## 19 **Methods and analysis**

### 20 *Study objectives*

21 The aim of this trial is to evaluate the safety and potential efficacy of allogeneic UC-MSC administration in patients  
22 with COPD. There are three specific objectives:

- 23 1. Evaluate the safety and potential therapeutic effectiveness of intravenously (IV) administered UC-MSCs in  
24 patients with COPD.
- 25 2. To prove the hypothesis that IV administration of UC-MSCs can improve lung function and reduce  
26 inflammatory responses in the lungs and fibrosis.
- 27 3. Explore the potential therapeutic mechanism of UC-MSCs in the treatment of COPD.

### 28 *Study design and ethics*

29 This matched case-control phase I/II clinical trial was approved by the Ethical Committee of Vinmec  
30 International Hospital (number: 166/2019/QĐ-VMC) and Vietnam Ministry of Health (number: 2002/QĐ-BYT).  
31 This study was registered at ClinicalTrials.gov (number NCT04433104). To achieve the aims, a total of 40 patients  
32 with COPD will be recruited at the Internal Medicine Department at Vinmec Times City International Hospital, Hanoi,  
33 Vietnam, between June 2020 and December 2021. A flowchart of the study design is shown in Figure 1.

### 34 *Sample size*

1  
2  
3 1 As a previous study indicated that the FEV<sub>1</sub> (%) of COPD patients was reduced to 35.4±7.1% (6% reduction)  
4 2 after 6 months post-administration, we set this indicator at 18% reduction after 12 months post-administration to  
5 3 calculate the minimum sample size for the proposed study<sup>18 21</sup>. According to the continuous endpoint of two  
6 4 independent sample studies<sup>22</sup>, we assumed  $\alpha$  was 0.05 and type-II error  $\beta$  was 0.2; thus, the smallest sample size was  
7 5 40 patients. The calculated sample size was 20 for each group.  
8  
9

### 10 11 **Matching strategy:**

12  
13 7 The patients from the control group will be assigned to a patient from the MSC group once they meet all  
14 8 matched criteria based on age ( $\pm 5$  years), gender, and COPD severity classification (GOLD 2019). Patients from both  
15 9 groups will receive standard COPD medication management according to their COPD severity classification and based  
16 10 on the Vietnam Ministry of Health guideline for COPD treatment, as shown in Figure 2 and Table 1.  
17

18  
19 11 A total of 40 patients will be recruited and assigned to the UC-MSC administration group (20 patients) and the  
20 12 control group (20 patients). The trial contains two phases: (1) the first phase will include recruiting and evaluating the  
21 13 first 5 patients from each group to assess the safety of UC-MSC administration after 1 month of follow-up, and (2)  
22 14 the second phase will be initiated after the 1<sup>st</sup> phase safety report is approved by the Ethical Committee of Vinmec  
23 15 International Hospital and Vietnam Ministry of Health to start recruiting the remaining 15 patients from each group  
24 16 to evaluate both safety and efficacy of the treatment.  
25  
26  
27

### 28 29 **Participants**

30  
31 18 The principal investigators, research and clinician team members are responsible for the study design, patient  
32 19 screening, recruitment, conduct, and perform follow-up assessments in the trial. Participants will be allowed to enroll  
33 20 or withdraw at any time throughout the study. The participants will have all screening and testing costs related to the  
34 21 trials waived except for the costs of COPD medications or drugs. All participants' information will be protected by  
35 22 coding and restricted access using a computer-based system. Participants will be enrolled in the study once they meet  
36 23 all inclusion and exclusion criteria.  
37  
38  
39

### 40 41 **Inclusion and exclusion criteria**

42 25 The diagnostic criteria and severity classification of COPD refers to the criteria established by the COPD 2019  
43 26 guidelines<sup>20</sup>. Patients will be asked to confirm the COPD conditions and classification from national hospitals and  
44 27 send the results to the administration office prior to enrollment in the trial for prescreening. Patients will be enrolled  
45 28 in the study in compliance with the inclusion and exclusion criteria established by a screening protocol as presented  
46 29 below.  
47  
48  
49

#### 50 51 **Inclusion Criteria**

- 52 31
- 53 32 ▪ Diagnosed with COPD with stage B, C, or D according to GOLD 2019.
  - 54 33 ▪ Age between 40-75 years old.
  - 55 34 ▪ Both genders.
- 56  
57  
58  
59  
60

### ***Exclusion Criteria***

- Smoker or less than 6 months of smoking cessation time.
- Asthma and other pulmonary-related diseases and injuries (including lung tuberculosis, restrictive lung disease, idiopathic pulmonary fibrosis, or lung cancer).
- Acute and/or active infection.
- Cancer.
- Patients with complex cardiovascular diseases (including valvular heart disease, cardiomyopathy, arrhythmia, congenital heart disease, hypertrophy syndrome).
- Liver and kidney failure.
- Pregnancy.
- Patients with life expectancy less than 6 months due to concomitant illness.
- Under immunosuppressive treatment within 8 weeks of the first screening visit.
- Patient diagnosed diabetes with HbA<sub>1C</sub>>7%.

### ***Recruitment***

Patients can only enroll in this study after passing the prescreening process, consultation resolution, and signing the informed consent form.

The recruitment campaign will target three main sources. First, potentially eligible hospitalized patients diagnosed with severe COPD will be approached and asked to participate in the study. Second, physicians will generate lists of patients from the electronic medical system of Vinmec Times City International Hospital with a diagnosis of COPD based on severity classification matching the GOLD 2019 criteria who were discharged within 2 years. Investigators or physicians will contact patients by telephone or mail them a research leaflet and recruitment letter. Third, leaflet and trial recruitment letters will be posted in the Vingroup cooperation internal email system, the official website, and the Facebook public platform of the Vinmec Healthcare system for those diagnosed with COPD GOLD 2019 (B, C, D) at other hospitals. If the patients are interested in this research, we will ask them to send the prescreen results to the administration office.

A multidisciplinary consultation will be held to evaluate the prescreening results from participants to confirm whether these potential participants meet the general diagnostic criteria of COPD, including inclusion and exclusion criteria. The consultation includes physicians and experts from respiratory, radiology, laboratory, and stem cell biology fields. If more than 80% of experts agree on the prescreening results, patients will be viewed as potential participants. The researchers will set an appointment to communicate with the potential candidates about the clinical trial details, including pros and cons of stem cell treatments and sign the written informed consent form prior to assigning patients to either stem cell administration or control groups.

The details of the clinical trial will be explained to patients by investigators or physicians as follows: (1) the study aims and scope, (2) background of COPD and UC-MS, (3) number of participants, study duration, and classification into either MS administration or control group, (4) study procedure (including screening, COPD



1 medication management, follow-up tests), (5) potential discomfort and risks of MSC administration (including  
2 prespecified adverse and severe adverse events), (6) expected outcomes of the treatment (primary safety evaluation  
3 and potential therapeutic improvement of both MSC administration and COPD medication management according to  
4 Vietnam Ministry of Health guideline), (7) protection policy of patients' information and privacy, and (8) voluntary  
5 participation (right and responsibility of patients). Patients will only sign written informed consent when all the above  
6 items are fully explained and the patients fully understand the protocol. The patients' baseline characteristics will be  
7 assessed by the clinicians within 30 days prior to UC-MSC administration for patients in the MSC administration  
8 group (Table 2).

### 9 ***Intervention***

10 30 Umbilical cord (UC) samples were obtained from healthy women with an uncomplicated, at term pregnancy  
11 who underwent serological testing, including tests for HIV, cytomegalovirus (CMV), Epstein-Barr virus (EBV),  
12 hepatitis A virus (HAV), hepatitis B virus (HBV), hepatitis C virus (HCV), syphilis, and chlamydia, at 38 weeks of  
13 pregnancy, as shown in previous study<sup>23</sup>. The UC tissues were collected at delivery and transferred to the Stem Cell  
14 Core Facility at the Vinmec Research Institute of Stem Cell and Gene Technology under ISO 14644-1 (certification  
15 number: CR61119-1). To generate a UC-MSC line for the current study, a single eligible UC tissue will be processed,  
16 isolated and cultured under xeno-free and serum-free conditions as previously described<sup>23</sup>. UC-MSCs will be  
17 expanded under these conditions to passage 5 (P5) and cryopreserved in the serum- and xeno-free defined reagent  
18 CryoStore<sup>®</sup> CS10 (Stem Cell Technology, Canada) in liquid nitrogen (gas phase) in an automated Brooks System  
19 (Brooks Life Science, USA) for long-term storage. The releasing criteria for UC-MSC products are shown in Table  
20 3.

21 To prepare UC-MSCs for therapy, aliquots of P5 UC-MSCs will be thawed in a temperature control water bath  
22 or incubator on the infusion day. The hUC-MSCs will be washed and suspended in 0.9% normal saline. In addition to  
23 inspecting the quality of the UC-MSC product based on the releasing criteria, the staff of the Cell Therapy Department  
24 will confirm the viability and quality of the UC-MSC product before the infusion. The cell dose will be calculated  
25 based on patients' body weight and cell viability results to obtain the dose of  $1 \times 10^6$  viable cells/kg patient body weight  
26 prior to transport to the administration ward. Currently, there is no effective treatment for COPD patients. Thus, the  
27 intervention group will be given the standard COPD medication management as primary treatment and extra UC-  
28 MSC administration, while the control group will receive only the standard COPD treatment (Table 1).

### 29 ***Mode of cell administration (UC-MSC group)***

30 Patients assigned to UC-MSC administration groups will receive two administrations at a dose of 1 million  
31 cells/kg patient bodyweight via the IV route with a 3-month intervening interval. On the day of infusion, thawed cells  
32 at P5 will be prepared to meet the target administration dose based on the number of viable cells in 10 mL of 0.9%  
33 NaCl (Braun, USA) as described above and delivered to the administration ward for infusion at a rate of 20 mL/hour.

### 34 ***Withdrawal***

Participant discontinuation may occur upon participant death, severe adverse events (SEAs), other serious disease-limiting involvement, or a direct request from participant to withdraw from the study. Once the participant withdraws from the study, the reasons for the withdrawal and all recorded results will be documented in detail. New participants will not be recruited to replace withdrawn participants.

### ***Adverse events (AEs)***

AEs are defined as adverse medical events that occur after the patient signs informed consent until completion of the follow-up period. AEs include abnormal laboratory results, symptoms, or diseases. All AEs will be documented on a written case report form (CRF) and transferred to a research electronic data capture (RedCap) system. Once AEs occur, the physician and clinician in charge will follow the necessary treatment according to the patient's condition and decide whether to suspend clinical research. In terms of severe adverse events (SAEs), the clinician team will follow the first priority to treat principle and be considered an emergency situation. The principal investigators will immediately inform the Ethical Committee and Medical Advisory board of Vinmec Times City International Hospital. Within 24 h, the SAE report should be submitted with full description, while a follow-up SAE report should be submitted to the Ethical Committee of Vinmec Times City International Hospital. Within the 7 days, the SAE report with comments from the Ethical Committee will be submitted to the National Ethical Committee of Vietnam Ministry of Health via post. All participants enrolled in the study will be subjected to an insurance policy that provides ancillary and posttrial medical care in case of injury or death as a result of their participation in the trial.

### ***Outcome evaluation***

#### ***Primary outcomes (safety)***

All required evaluation and laboratory tests with the timeframes are listed in Table 1. To assess safety, the number of AEs or SAEs during stem cell administration (72 h) at 3 months, 6 months, and 12 months after discharge will be evaluated. Body temperature, blood pressure, respiratory rate, heart rate, and SpO<sub>2</sub> will be recorded before and during MSC administration up to 24 h. As mentioned above, the first phase of this study will involve recruiting five pairs of patients to evaluate the safety prior to initiating the second phase. The safety report of the first phase will cover one month postdischarge and will be submitted to the Ethical Committee of Vinmec Times City International Hospital and the National Ethical Committee of Vietnam Ministry of Health for approval of starting the second phase.

SAEs include death, any critical cardiac event (new ventricular tachycardia, ventricular fibrillation, or asystole, cardiac arrest, cardiac hypertrophy), acute pulmonary distress and embolism, stroke, anaphylactic shock, sepsis, and other conditions that extend the hospital stay. The prespecified AEs include fever, common allergic reactions (rash, edema, erythema, pallor), infection at the administration site, changes in vital signs, and abnormal laboratory test results (including hematological analysis and indicators of liver and kidney functions).

#### ***Secondary outcomes (Efficacy)***

The efficacy endpoints are as follows: (1) number of admissions and readmissions, (2) general self-efficacy, (3) the number of admissions and unscheduled outpatient visits due to symptoms of COPD, (3) arterial blood gas

1  
2  
3 1 analysis (including pH, PaO<sub>2</sub>, PaCO<sub>2</sub>, BE, HCO<sub>3</sub><sup>-</sup>), (4) respiratory functions (FEV<sub>1</sub>, FEV<sub>1</sub>/FVC, VC, TLC, RV,  
4 2 DLCO, DLNO/DLCO), (5) electrocardiogram, echocardiography, high-resolution chest computed tomography,  
5 3 abdominal ultrasound, abnormality of thyroid and mammary gland, (6) inflammatory response (CRP, Pro-BNP, and  
6 4 Troponin-T) and (7) cytokine analysis from patients' plasma. In addition, the modified medical research council  
7 5 (mMRC) questionnaire and quality of life (Georges Respiratory Questionnaire – SGRQ) will be used to monitor  
8 6 respiratory function improvement. To reveal the therapeutic effects of UC-MSC administration, UC-MSC  
9 7 characterization will be conducted *in vitro*, including MSC marker analysis, metabolic evaluation, immunoregulatory  
10 8 assessment, and cytokine secretion analysis (Table 4).

### 9 ***Follow-up procedure***

10 Follow-up visits will be conducted at 3, 6, and 12 months after hUC-MSC administration. Patients will be  
11 11 asked to come to the hospital to undergo an assessment of their conditions according to the protocol procedure. The  
12 12 safety follow-up will include an extra 1-month follow-up point via telephone and outpatient contact, and patients will  
13 13 only be asked to make an appointment if AEs or SAEs occur.

### 14 ***Data collection***

15 The data accumulated during the trial will be documented in the patients' medical records and the CRF. The  
16 16 quality control officers from Vinmec Times City International Hospital and Vinmec Scientific Research Board  
17 17 independently checked the accuracy and consistency of the CRF data with the original patients' medical records to  
18 18 ensure that the data were accurately entered into the CRF. Once the CRF is checked, within 7 days, all data will be  
19 19 recorded to RedCap software by assigned personnel and crosschecked by principle investigators. There are four data  
20 20 collection points, including baseline and 3 months, 6 months, and 12 months postadministration. The internal auditor  
21 21 of the Vinmec Research Institute of Stem Cell and Gene Technology will review each original research record to  
22 22 confirm the accuracy, consistency, timely records, and meet the standard requirements. Data analysis will be  
23 23 performed using RedCap and statistical analysis software following the statistical analysis strategy  
24 24 (<https://redcap.vinmec.com/>). The data of this clinical trial will be disseminated with permission from funding bodies  
25 25 and principle investigators through national and international conferences, peer-reviewed publications, and scientific  
26 26 reports. A complete data set will be available upon request after trial completion.

### 27 ***Statistical analysis strategy***

28 Descriptive statistics will be used to illustrate the demographics of the COPD patients. Categorical variables  
29 29 are expressed as proportions, whereas quantitative variables are described as the mean values and their standard  
30 30 deviations or as the medians and their interquartile ranges. The number and type of adverse events/serious adverse  
31 31 events will be compared between the two treatment groups using the Chi square (or Fisher's exact) test. For the  
32 32 intervention and control groups, the indicators (m-MRC, CAT, SGRQ, respiratory functions, and arterial blood gas  
33 33 analysis) at baseline and at 3 months, 6 months, and 12 months will be compared with repeated measures ANOVA.  
34 34 P-values < 0.05 will be considered statistically significant. The analyses will be performed using Stata version 14  
35 35 (StataCorp, College Station, TX, USA).

## 1 **Patient and public involvement**

2 The patients and public were not involved in the design, or conduct, or reporting or dissemination plans of  
3 our research.

## 4 **Ethics and Dissemination**

5 This trial, including the consent form and clinical protocol, was approved by the Ethical Committee of Vinmec  
6 International Hospital (number: 166/2019/QĐ-VMEC) and Vietnam Ministry of Health (number: 2002/QĐ-BYT).  
7 This study was registered at ClinicalTrials.gov (number NCT04433104). The trial conforms with the Declaration of  
8 Helsinki. All participants will provide oral and written informed consent prior to participating in the study. This study  
9 will be reported in accordance with the STROBE guidelines for matched case-control trial<sup>24</sup>. We will disseminate the  
10 research results through high-quality peer-reviewed open access (via PubMed) journals and presentations at national  
11 and international conferences. Finally, an ongoing update of the trial will also be provided and shared annually with  
12 our partners in the health system and community agencies according to National Regulation.

## 13 **Discussion**

14 This study protocol presents the matched-control phase I/II clinical trial evaluating the safety and potential  
15 efficacy of allogeneic UC-MSC administration in patients with moderate-to-severe COPD (GOLD 2019). To date,  
16 there is no effective treatment available for COPD patients, and pharmacological interventions are hampered by the  
17 heterogeneity of disease mechanisms and phenotypic alternation. Therefore, establishing new treatment methods to  
18 reduce the devastating effects of COPD is imperative. The body of preclinical studies and human clinical trials  
19 suggests that MSC administration emerges as a potential therapeutic approach for COPD because MSCs have been  
20 found to be well tolerated and safe in many clinical trials and have proven their effectiveness in animal models. Several  
21 clinical trials have been conducted in COPD. Most of these studies were phase 1 safety trials, which uniformly reported  
22 no obvious adverse events and serious adverse events as well as no evidence of infusional toxicities during the follow-  
23 up period<sup>25</sup>. However, the effectiveness of MSC therapy showed differences among various clinical trials, and a small  
24 number of trials have revealed no significant changes in lung function and fibrosis postadministration compared with  
25 baseline levels<sup>26</sup>. Therefore, it is important to comprehensively analyze the factors that directly contribute to treatment  
26 safety and efficacy.

27 Human clinical trials were conducted to evaluate the safety and efficacy of MSCs in the treatment of COPD,  
28 including five studies using bone marrow-derived cells<sup>14-17</sup> and a pilot study using UC-MSCs<sup>18</sup>. The first study  
29 supported the safety profile of MSCs administered BMSCs to four COPD patients, although the overall clinical  
30 outcomes did not demonstrate the efficacy of the treatment. It is understandable that studies together with the two  
31 trials (NCT001110252 and NCT01306513) are phase 1 clinical trials that aimed to evaluate the safety and feasibility  
32 of cellular administration in the treatment of COPD. Notably, the NCT001110252 study followed up with patients for  
33 up to 3 years illustrated an overall reduction in the process of COPD pathological development<sup>19</sup>. In a pilot study  
34 using UC-MSCs, COPD patients were followed up for 6 months, and no AEs or SAEs were observed throughout the  
35 course of the study. Although clinical outcomes such as COPD exacerbations, mMRC score, and CAT were

1 significantly reduced postadministration, pulmonary function parameters remained unchanged compared to baseline  
2  
3 1<sup>8</sup>. In our current study, we use UC-MSCs as an “off-the-shelf” product for administration, providing flexibility in  
4 2  
5 3 patient management and standardized products for all treated patients, allowing more accuracy in evaluation.  
6 4  
7 Moreover, by using a matched control design, our study aims to eliminate the variability in COPD conditions between  
8 5  
9 the intervention and control groups to accurately evaluate the safety and efficacy of the treatment. In general, it was  
10 6  
11 confirmed that MSC administration is well tolerated without serious adverse events or administration-associated  
12 7  
13 adverse events and is not associated with significant alterations in spirometry, immune function, cardiovascular  
14 8  
15 activity, or patient quality of life <sup>27</sup>.

16 9 The major delivery routes of MSCs in the treatment of pulmonary disease include intraperitoneal (usually in  
17 10  
18 animal models), intranasal or intratracheal, and IV administration. The intratracheal administration of MSCs was  
19 11  
20 performed in children with bronchopulmonary dysplasia in several small uncontrolled studies. However, in terms of  
21 12  
22 COPD, all trials utilized IV administration with the aim of investigating whether systemic administration of MSCs is  
23 13  
24 safe and effective in COPD patients. In fact, the IV administration route is considered a better option compared to  
25 14  
26 intratracheal delivery for several reasons. Previous studies illustrated that IV administration of MSCs was safe and  
27 15  
28 potentially provided therapeutic effects in several lung diseases, including COPD <sup>15,26</sup>. Moreover, a systemic analysis  
29 16  
30 of preclinical studies suggested that IV administration of MSCs introduced better effects than those administered via  
31 17  
32 the intratracheal route <sup>13</sup>. We hypothesized that the results of this clinical trial will provide data supporting that UC-  
33 18  
34 MSC administration via the IV route is safe, feasible, and potentially effective in COPD patients.

35 19 The dose-escalating evaluation has been conducted in several clinical trials for various diseases, including  
36 20  
37 pulmonary syndromes, using a wide range of UC-MSC doses from 0.5 – 10 million cells/kg via IV administration <sup>15</sup>  
38 21  
39 <sup>26,28</sup>. Notably, limited studies have reported the different effects of MSC doses in COPD patients. In fact, a relatively  
40 22  
41 high dose (10 million cells/kg patient body weight) was tested in ARDS patients without any administration-associated  
42 23  
43 AEs or SAEs recorded. However, it is important to note that delivery of a high dose of stem cells might increase the  
44 24  
45 risk of pulmonary embolism and thrombosis regardless of administration route, which was demonstrated previously  
46 25  
47 in animal models and clinical trials <sup>29-31</sup>. Therefore, in this trial, we used the most common dose of MSCs used in  
48 26  
49 numerous studies, which is 1 million cells/kg patient body weight.

50 27 In pre-clinical models of elastase-induced emphysema, two doses of MSCs improved anti-inflammatory  
51 28  
52 regulation and lung recover compared to a single dose of MSCs <sup>32</sup>. In clinical trial using BM-MSCs, COPD patients  
53 29  
54 received four infusions showed a reduction in circulating C-reactive protein and in combination with lung volume  
55 30  
56 reduction strategy, two infusions were enough to increase the expression of CD31, an indication of microvascular  
57 31  
58 endothelial cell response <sup>17,25</sup>. Moreover, the effects of autologous MSC administration were reported to be relatively  
59 32  
60 narrow because it was reported the positive effects in patients with type 2 diabetes were observed as early as 1 month  
61 33  
62 post-administration of MSCs and started to diminish after three to six months post-administration <sup>33,34</sup>. Hence, in this  
63 34  
64 current study, we will perform two doses of UC-MSCs with a 3-month intervening interval.

65 35 This clinical trial has several advantages. First, this is the first trial using an “off-the-shelf” product (UC-MSCs)  
66 36  
67 for COPD patients. Second, this is the first trial to investigate the therapeutic effects of UC-MSCs as supplementary

1 products in combination with standard medication treatments according to the GOLD 2019 recommendation. Third,  
2 if the potential efficacy can be detected throughout the course of our study, our results (including MSC biological  
3 analysis of stem cell characterization, immunoregulation, and metabolism) will strengthen our knowledge and  
4 understanding of UC-MSC effects in COPD and provide a fundamental background for treating patients with  
5 moderate-to-severe COPD. In the case of no therapeutic effect, our data will also provide important insight into the  
6 safety of the treatment and potential alternative approach for MSC therapy of COPD.

## 7 **Acknowledgements**

8 The authors would like to thank all patients involved in the study for their trust, understanding, and  
9 willingness. We thank our collaborating clinicians at the Vinmec Health Care System for participating in this study.  
10 We also thank our colleagues at Vinmec High-tech center and Vinmec Tissue Bank for their support with the quality  
11 control and UC-MSC experiment set up.

## 12 **Contributors:**

13 TLN, DMH, and KTN were involved in the design of the study. DMH drafted the manuscripts with critical input from  
14 LNT, KTN, AHN, and BNN. LNT, AHN, and BNN contributed to the standard medical treatment checklist and drug  
15 for all patients. DMH, LNT and AHN are the grant holder and project leader, respectively. All authors reviewed,  
16 edited and approved the final version of the manuscript.

## 17 **Funding**

18 This work was supported by the Vingroup Scientific Research and Clinical Application Fund (Grant number:  
19 ISC.19.16). The funder has no role in the analysis or preparation of this manuscript.

## 20 **Conflicts of Interests**

21 None declared.

## 22 **Patient consent for publication**

23 Not required

## 24 **References**

- 25 1. Rabe KF, Watz H. Chronic obstructive pulmonary disease. *Lancet* 2017;389(10082):1931-40. doi: 10.1016/S0140-  
26 6736(17)31222-9 [published Online First: 2017/05/18]
- 27 2. Collaborators GBDCRD. Global, regional, and national deaths, prevalence, disability-adjusted life years, and years  
28 lived with disability for chronic obstructive pulmonary disease and asthma, 1990-2015: a systematic analysis  
29 for the Global Burden of Disease Study 2015. *Lancet Respir Med* 2017;5(9):691-706. doi: 10.1016/S2213-  
30 2600(17)30293-X
- 31 3. Ho T, Cusack RP, Chaudhary N, et al. Under- and over-diagnosis of COPD: a global perspective. *Breathe (Sheff)*  
32 2019;15(1):24-35. doi: 10.1183/20734735.0346-2018 [published Online First: 2019/03/07]



- 1  
2  
3 1 4. Nguyen TS, Nguyen TLH, Pham TTV, et al. Impact of pharmaceutical care in the improvement of medication  
4 2 adherence and quality of life for COPD patients in Vietnam. *Respir Med* 2019;153:31-37. doi:  
5 3 10.1016/j.rmed.2019.05.006
- 6 4 5. Ngo CQ, Phan DM, Vu GV, et al. Inhaler Technique and Adherence to Inhaled Medications among Patients with  
7 5 Acute Exacerbation of Chronic Obstructive Pulmonary Disease in Vietnam. *Int J Environ Res Public Health*  
8 6 2019;16(2) doi: 10.3390/ijerph16020185
- 9 7 6. Caplan AI. Mesenchymal Stem Cells: Time to Change the Name! *Stem Cells Transl Med* 2017;6(6):1445-51. doi:  
10 8 10.1002/sctm.17-0051
- 11 9 7. Viswanathan S, Shi Y, Galipeau J, et al. Mesenchymal stem versus stromal cells: International Society for Cell &  
12 10 Gene Therapy (ISCT(R)) Mesenchymal Stromal Cell committee position statement on nomenclature.  
13 11 *Cytotherapy* 2019;21(10):1019-24. doi: 10.1016/j.jcyt.2019.08.002
- 14 12 8. Dominici M, Le Blanc K, Mueller I, et al. Minimal criteria for defining multipotent mesenchymal stromal cells.  
15 13 The International Society for Cellular Therapy position statement. *Cytotherapy* 2006;8(4):315-7. doi:  
16 14 10.1080/14653240600855905
- 17 15 9. Amable PR, Teixeira MV, Carias RB, et al. Protein synthesis and secretion in human mesenchymal cells derived  
18 16 from bone marrow, adipose tissue and Wharton's jelly. *Stem Cell Res Ther* 2014;5(2):53. doi: 10.1186/s12944-014-0442-2
- 19 17 10. Qin H, Zhao A. Mesenchymal stem cell therapy for acute respiratory distress syndrome: from basic to clinics.  
20 18 *Protein Cell* 2020;11(10):707-22. doi: 10.1007/s13238-020-00738-2
- 21 19 11. Cruz FF, Rocco PRM. The potential of mesenchymal stem cell therapy for chronic lung disease. *Expert Rev Respir*  
22 20 *Med* 2020;14(1):31-39. doi: 10.1080/17476348.2020.1679628
- 23 21 12. Mohammadipoor A, Antebi B, Batchinsky AI, et al. Therapeutic potential of products derived from mesenchymal  
24 22 stem/stromal cells in pulmonary disease. *Respir Res* 2018;19(1):218. doi: 10.1186/s12931-018-0921-x
- 25 23 13. Eggenhofer E, Benseler V, Kroemer A, et al. Mesenchymal stem cells are short-lived and do not migrate beyond  
26 24 the lungs after intravenous infusion. *Front Immunol* 2012;3:297. doi: 10.3389/fimmu.2012.00297
- 27 25 14. Ribeiro-Paes JT, Bilaqui A, Greco OT, et al. Unicentric study of cell therapy in chronic obstructive pulmonary  
28 26 disease/pulmonary emphysema. *Int J Chron Obstruct Pulmon Dis* 2011;6:63-71. doi:  
29 27 10.2147/COPD.S15292
- 30 28 15. Weiss DJ, Casaburi R, Flannery R, et al. A placebo-controlled, randomized trial of mesenchymal stem cells in  
31 29 COPD. *Chest* 2013;143(6):1590-98. doi: 10.1378/chest.12-2094
- 32 30 16. de Oliveira HG, Cruz FF, Antunes MA, et al. Combined Bone Marrow-Derived Mesenchymal Stromal Cell  
33 31 Therapy and One-Way Endobronchial Valve Placement in Patients with Pulmonary Emphysema: A Phase I  
34 32 Clinical Trial. *Stem Cells Transl Med* 2017;6(3):962-69. doi: 10.1002/sctm.16-0315
- 35 33 17. Stolk J, Broekman W, Mauad T, et al. A phase I study for intravenous autologous mesenchymal stromal cell  
36 34 administration to patients with severe emphysema. *QJM* 2016;109(5):331-6. doi: 10.1093/qjmed/hcw001
- 37 35 18. Le Thi Bich P, Nguyen Thi H, Dang Ngo Chau H, et al. Allogeneic umbilical cord-derived mesenchymal stem  
38 36 cell transplantation for treating chronic obstructive pulmonary disease: a pilot clinical study. *Stem Cell Res*  
39 37 *Ther* 2020;11(1):60. doi: 10.1186/s13287-020-1583-4

- 1  
2  
3 1 19. Stessuk T, Ruiz MA, Greco OT, et al. Phase I clinical trial of cell therapy in patients with advanced chronic  
4 2 obstructive pulmonary disease: follow-up of up to 3 years. *Rev Bras Hematol Hemoter* 2013;35(5):352-7.  
5 3 doi: 10.5581/1516-8484.20130113  
6 4  
7 4 20. Singh D, Agusti A, Anzueto A, et al. Global Strategy for the Diagnosis, Management, and Prevention of Chronic  
8 5 Obstructive Lung Disease: the GOLD science committee report 2019. *Eur Respir J* 2019;53(5) doi:  
9 6 10.1183/13993003.00164-2019  
10 7  
11 7 21. Kim S, Oh J, Kim YI, et al. Differences in classification of COPD group using COPD assessment test (CAT) or  
12 8 modified Medical Research Council (mMRC) dyspnea scores: a cross-sectional analyses. *BMC Pulm Med*  
13 9 2013;13:35. doi: 10.1186/1471-2466-13-35 [published Online First: 2013/06/05]  
14 10  
15 10 22. Hsieh FY. Sample size formulae for intervention studies with the cluster as unit of randomization. *Stat Med*  
16 11 1988;7(11):1195-201. doi: 10.1002/sim.4780071113 [published Online First: 1988/11/01]  
17 12  
18 12 23. Hoang VT, Trinh QM, Phuong DTM, et al. Standardized xeno- and serum-free culture platform enables large-  
19 13 scale expansion of high-quality mesenchymal stem/stromal cells from perinatal and adult tissue sources.  
20 14 *Cytotherapy* 2020 doi: 10.1016/j.jcyt.2020.09.004 [published Online First: 2020/10/25]  
21 15  
22 15 24. Cuschieri S. The STROBE guidelines. *Saudi J Anaesth* 2019;13(Suppl 1):S31-S34. doi: 10.4103/sja.SJA\_543\_18  
23 16 [published Online First: 2019/04/02]  
24 17  
25 17 25. Weiss DJ. Cell-based Therapy for Chronic Obstructive Pulmonary Disease. Rebuilding the Lung. *Ann Am Thorac*  
26 18 *Soc* 2018;15(Suppl 4):S253-S59. doi: 10.1513/AnnalsATS.201808-534MG [published Online First:  
27 19 2019/02/14]  
28 20  
29 20 26. Wilson JG, Liu KD, Zhuo H, et al. Mesenchymal stem (stromal) cells for treatment of ARDS: a phase 1 clinical  
30 21 trial. *Lancet Respir Med* 2015;3(1):24-32. doi: 10.1016/S2213-2600(14)70291-7  
31 22  
32 22 27. Zhao R, Su Z, Wu J, et al. Serious adverse events of cell therapy for respiratory diseases: a systematic review and  
33 23 meta-analysis. *Oncotarget* 2017;8(18):30511-23. doi: 10.18632/oncotarget.15426  
34 24  
35 24 28. He X, Ai S, Guo W, et al. Umbilical cord-derived mesenchymal stem (stromal) cells for treatment of severe sepsis:  
36 25 aphase 1 clinical trial. *Transl Res* 2018;199:52-61. doi: 10.1016/j.trsl.2018.04.006  
37 26  
38 26 29. Tanaka E, Ogawa Y, Mukai T, et al. Dose-Dependent Effect of Intravenous Administration of Human Umbilical  
39 27 Cord-Derived Mesenchymal Stem Cells in Neonatal Stroke Mice. *Front Neurol* 2018;9:133. doi:  
40 28 10.3389/fneur.2018.00133  
41 29  
42 29 30. Kansu E. Thrombosis in stem cell transplantation. *Hematology* 2012;17 Suppl 1:S159-62. doi:  
43 30 10.1179/102453312X13336169156735  
44 31  
45 31 31. Jung JW, Kwon M, Choi JC, et al. Familial occurrence of pulmonary embolism after intravenous, adipose tissue-  
46 32 derived stem cell therapy. *Yonsei Med J* 2013;54(5):1293-6. doi: 10.3349/ymj.2013.54.5.1293  
47 33  
48 32 32. Poggio HA, Antunes MA, Rocha NN, et al. Impact of one versus two doses of mesenchymal stromal cells on lung  
49 34 and cardiovascular repair in experimental emphysema. *Stem Cell Res Ther* 2018;9(1):296. doi:  
50 35 10.1186/s13287-018-1043-6 [published Online First: 2018/11/10]  
51  
52  
53  
54  
55  
56  
57  
58  
59  
60



- 1  
2  
3 1 33. Hu J, Li C, Wang L, et al. Long term effects of the implantation of autologous bone marrow mononuclear cells  
4 2 for type 2 diabetes mellitus. *Endocr J* 2012;59(11):1031-9. doi: 10.1507/endocrj.ej12-0092 [published  
5 3 Online First: 2012/07/21]  
6 4  
7 4 34. Liu X, Zheng P, Wang X, et al. A preliminary evaluation of efficacy and safety of Wharton's jelly mesenchymal  
8 5 stem cell transplantation in patients with type 2 diabetes mellitus. *Stem Cell Res Ther* 2014;5(2):57. doi:  
9 6 10.1186/s12944-014-0446-6 [published Online First: 2014/04/25]  
10  
11  
12  
13  
14  
15  
16  
17  
18

19 9 **Figure Legend:**

20 10 **Figure 1: Schematic of the study.** COPD patients will be screened to enroll in the study. Patients from the control  
21 11 group will be assigned to a patient from the UC-MSC group once they meet all matched criteria based on age ( $\pm 5$   
22 12 years), gender, and COPD severity classification (GOLD 2019).

23 13 **Figure 2: Standard COPD medication treatment for both groups according to GOLD 2019 and Vietnam**  
24 14 **Ministry of Health Guideline.** Matched COPD patients will be treated using the same treatment based on their GOLD  
25 15 2019 classification (Groups A, B, C, and D). Group A (not included in this study): a single bronchodilator will be used  
26 16 and based on the clinical assessments and persistence of the symptoms to continue/stop or replace by another  
27 17 bronchodilator. Group B: Single LAMA or LABA will be initially used. If the symptoms are not reduced, a  
28 18 combination of both LAMA and LABA will be applied. Group C: A single LAMA drug will be used for initial  
29 19 treatment. If exacerbations occur, LAMA and LABA combination will be applied as priority. The LAMA + ICS will  
30 20 be applied in specific cases based on clinical assessment, as the ICS has been reported to have severe side effects on  
31 21 lung inflammation. Group D: Should start the treatment with LAMA. If the patient has CAT $>20$ , LABA and LAMA  
32 22 will be used as initial treatment. LABA + ICS will be used as the initial treatment only when the patient has asthma  
33 23 COPD overlap or the patient's eosinophil level  $> 300$ . If exacerbation occurs after the initial treatment, the combination  
34 24 of LAMA, LABA, and ICS should be applied. Additional roflumilast should be used if FEV1  $< 50\%$  and the patient  
35 25 has chronic bronchitis. Macrolide should be used if the patient is a former smoker. The red arrow indicates priority  
36 26 treatment.  
37  
38  
39  
40  
41  
42  
43  
44  
45  
46  
47  
48  
49  
50  
51  
52  
53  
54  
55  
56  
57  
58  
59  
60

**Table 1: Standard medication treatment for both groups based on GOLD 2019 guidelines and Vietnam Ministry of Health recommendations.**

| Items                                                                          | COPD GOLD 2019 Group B                                                                    | COPD GOLD 2019 Group C       | COPD GOLD 2019 Group D                                                                                                                        |
|--------------------------------------------------------------------------------|-------------------------------------------------------------------------------------------|------------------------------|-----------------------------------------------------------------------------------------------------------------------------------------------|
| <b>Initial treatment</b>                                                       | A long acting bronchodilator (LABA or LAMA)                                               | LAMA                         | LAMA                                                                                                                                          |
| <b>Difficulty in breathing (moderate)</b>                                      | LAMA + LABA                                                                               | LAMA + LABA<br>Or LAMA + ICS | LAMA + LABA<br>ISC/LABA use when: <ul style="list-style-type: none"> <li>▪ Asthma COPD overlap.</li> <li>▪ Eosinophils &gt;300/ul.</li> </ul> |
| <b>Difficulty in breathing (Severe)</b>                                        | LAMA + LABA                                                                               | LAMA + LABA<br>Or LAMA + ICS | LAMA + LABA + ICS                                                                                                                             |
| <b>Name of Drugs use in Standard COPD Medication Treatment for both groups</b> |                                                                                           |                              |                                                                                                                                               |
| <b>SABA</b>                                                                    | Salbutamol, Terbutaline, Fenoterol                                                        |                              |                                                                                                                                               |
| <b>LABA</b>                                                                    | Indacaterol, Bambuterol                                                                   |                              |                                                                                                                                               |
| <b>SAMA</b>                                                                    | Ipratropium                                                                               |                              |                                                                                                                                               |
| <b>LAMA</b>                                                                    | Tiotropium                                                                                |                              |                                                                                                                                               |
| <b>SABA + SAMA</b>                                                             | Ipratropium and salbutamol<br>Ipratropium and fenoterol                                   |                              |                                                                                                                                               |
| <b>LABA + LAMA</b>                                                             | Indacaterol and Glycopyronium<br>Olodaterol and Tiotropium<br>Vilanterol and Umeclidinium |                              |                                                                                                                                               |
| <b>ICS + LABA</b>                                                              | Budesonid and Formoterol<br>Fluticason and Vilanterol<br>Fluticason and Salmeterol        |                              |                                                                                                                                               |
| <b>Antibiotics</b>                                                             | Erythromycin<br>Rofumilast <sup>1</sup>                                                   |                              |                                                                                                                                               |
| <b>Long/short-acting Xanthine</b>                                              | Theophyllin/Theostat                                                                      |                              |                                                                                                                                               |

<sup>1</sup>: Roflumilast was used only when patients' FEV1 < 50% and had at least 1 admission within 1 year

**Table 2: Study timeline and clinical procedures during the trial.** \* If the results of the screening phase for UC-MSC groups are within 30 days of UC-MSC administration, they will be automatically considered as the baseline level.

| Study Procedure                                                  | Prescreening                        | Screening phase*                    | Baseline                            | 3 months                            | 6 months                            | 12 months                           |
|------------------------------------------------------------------|-------------------------------------|-------------------------------------|-------------------------------------|-------------------------------------|-------------------------------------|-------------------------------------|
| UC-MSC administration <sup>1</sup>                               |                                     |                                     | <input checked="" type="checkbox"/> | <input checked="" type="checkbox"/> |                                     |                                     |
| Medication treatment <sup>2</sup>                                |                                     |                                     | <input checked="" type="checkbox"/> | <input checked="" type="checkbox"/> | <input checked="" type="checkbox"/> | <input checked="" type="checkbox"/> |
| Informed consent                                                 |                                     | <input checked="" type="checkbox"/> |                                     |                                     |                                     |                                     |
| Inclusion and exclusion criteria                                 |                                     | <input checked="" type="checkbox"/> |                                     |                                     |                                     |                                     |
| Demographic information                                          |                                     | <input checked="" type="checkbox"/> | <input checked="" type="checkbox"/> |                                     |                                     |                                     |
| Patients' medical reports                                        |                                     | <input checked="" type="checkbox"/> |
| Vital signs <sup>3</sup> /physical examination                   |                                     | <input checked="" type="checkbox"/> |
| COPD assessment                                                  | <input checked="" type="checkbox"/> | <input checked="" type="checkbox"/> |                                     |                                     |                                     |                                     |
| COPD GOLD 2019 classification                                    | <input checked="" type="checkbox"/> | <input checked="" type="checkbox"/> |                                     | <input checked="" type="checkbox"/> | <input checked="" type="checkbox"/> | <input checked="" type="checkbox"/> |
| Hematology analysis <sup>4</sup>                                 | <input checked="" type="checkbox"/> |
| Infectious disease examination/test <sup>5</sup>                 | <input checked="" type="checkbox"/> | <input checked="" type="checkbox"/> | <input checked="" type="checkbox"/> |                                     |                                     |                                     |
| Blood oxygen saturation/arterial blood gas analysis <sup>6</sup> | <input checked="" type="checkbox"/> |
| Chest CT scan                                                    |                                     | <input checked="" type="checkbox"/> | <input checked="" type="checkbox"/> |                                     | <input checked="" type="checkbox"/> | <input checked="" type="checkbox"/> |
| Chest X-ray                                                      |                                     | <input checked="" type="checkbox"/> | <input checked="" type="checkbox"/> |                                     | <input checked="" type="checkbox"/> | <input checked="" type="checkbox"/> |
| Pulmonary function analysis                                      |                                     | <input checked="" type="checkbox"/> |
| Adverse event evaluation                                         |                                     |                                     | <input checked="" type="checkbox"/> | <input checked="" type="checkbox"/> | <input checked="" type="checkbox"/> | <input checked="" type="checkbox"/> |
| Mortality/complications monitoring                               |                                     |                                     | <input checked="" type="checkbox"/> | <input checked="" type="checkbox"/> | <input checked="" type="checkbox"/> | <input checked="" type="checkbox"/> |

<sup>1</sup>: Applies only for the UC-MSC group at baseline and 3 months.

<sup>2</sup>: Treatment medication applies for all testing groups based on patients' COPD classification according to GOLD 2019 guidelines.

1  
2  
3: Vital signs include body temperature, blood pressure, heart rate, respiratory rate, oxygen saturation, and patient  
4 body weight.

5  
6: Hematological analysis included white blood cell count, platelet count, red blood cell count, hemoglobin, percentage  
7 of lymphocytes, neutrophils, monocytes, eosinophils, basophils, C-reactive protein, Pro-BNP, and Troponin-T.

8  
9: Infectious diseases include hepatitis, syphilis, HIV, HBV, and tuberculosis.

10  
11: Blood gas analysis includes pH, PaO<sub>2</sub>, PaCO<sub>2</sub>, BE, HCO<sub>3</sub><sup>-</sup>.

12  
13  
14  
15  
16  
17  
18  
19  
20  
21  
22  
23  
24  
25  
26  
27  
28  
29  
30  
31  
32  
33  
34  
35  
36  
37  
38  
39  
40  
41  
42  
43  
44  
45  
46  
47  
48  
49  
50  
51  
52  
53  
54  
55  
56  
57  
58  
59  
60

For peer review only

**Table 3: Release criteria and stem cell quality control.** To assess the quality of UC-MSCs for administration, a set of release criteria was defined, which included the following: the positive markers (CD73, CD90, and CD105) must be higher than 95%, the negative markers (CD11b, CD19, CD34, CD45, and HLA-DR) must be less than 2%; the cell viability must be higher than 80% with a normal karyotype; and the cell product must be free from microorganism infections and mycoplasma. Immunoregulatory assays will be performed to assess but not consider released criteria.

| Criteria                                             | Testing Method                                                | Released criteria |
|------------------------------------------------------|---------------------------------------------------------------|-------------------|
| <b>Positive markers (%) (median, range)</b>          |                                                               |                   |
| <i>CD73</i>                                          |                                                               | > 95%             |
| <i>CD90</i>                                          | Flow cytometry using the Human MSC                            | > 95%             |
| <i>CD105</i>                                         | Analysis Kit (Becton Dickinson, USA)                          | > 95%             |
| <b>Negative markers (%)</b>                          |                                                               | < 2%              |
| <b>Cell viability (%) (mean <math>\pm</math> SD)</b> | Trypan Blue staining                                          | > 80%             |
| <b>Microorganism tests</b>                           | BacT/Alert® 3D microbial detection System (Biomerieux, USA)   | Negative          |
| <b>Mycoplasma</b>                                    | MycoAlert™ Plus Mycoplasma Detection Kit (Lonza, Switzerland) | Negative          |
| <b>Endotoxin</b>                                     | Endosafe-PTS (Charles River Laboratories)                     | $\leq$ 5 EU/kg    |
| <b>Immunoregulatory assay</b>                        | Flow Cytometry                                                | Not Applicable    |

**Table 4: Proposed experiments design for evaluation the potential therapeutic mechanism of UC-MSCs in the treatment of COPD**

| Proposed Experiments                         | Criteria                                                                    | Cell Type/Method                                                                                                         | Expected Outcomes                                                                                                                   |
|----------------------------------------------|-----------------------------------------------------------------------------|--------------------------------------------------------------------------------------------------------------------------|-------------------------------------------------------------------------------------------------------------------------------------|
| <b>UC-MSC characterization</b>               | MSC marker analysis                                                         | UC-MSCs/Flow cytometry                                                                                                   | Meet ISCT guideline                                                                                                                 |
|                                              | Differentiation potential                                                   | UC-MSCs/ <i>In vitro</i> differentiation using commercial kits.                                                          | Adipogenic, Chondrogenic, and Osteogenic differentiation                                                                            |
|                                              | Karyotype                                                                   | UC-MSCs/ G-banding method                                                                                                | Normal post-expansion                                                                                                               |
|                                              | Growth factor, cytokines secretion                                          | UC-MSCs/ProcartaPlex Immunoassays                                                                                        | Detection of cytokines and growth factors involves in anti-inflammatory and tissue regeneration process.                            |
| <b>Metabolic evaluation</b>                  | Mitochondrial activities                                                    | UC-MSCs/Agilent Seahorse XF cell mito stress test                                                                        | Measurement of mitochondrial activities of UC-MSCs pre-administration                                                               |
|                                              | Glycolysis                                                                  | UC-MSCs/Agilent Seahorse XF Glycolysis Stress Test                                                                       | Measurement of glycolysis process of UC-MSC pre-administration                                                                      |
| <b>Immunoregulatory Assessment</b>           | Lymphocyte Proliferation Assay                                              | UC-MSCs + peripheral mononuclear cells from healthy donors                                                               | UC-MSCs inhibit the proliferation rate of lymphocytes in the present of PHA.                                                        |
|                                              |                                                                             | UC-MSCs + peripheral mononuclear cells from COPD patients                                                                | UC-MSCs inhibit the proliferation rate of lymphocytes in the present of PHA in a similar manner to healthy donor counterpart        |
| <b>Growth factors and cytokines analysis</b> | UC-MSC secretion profiles under xeno-free and serum-free culture conditions | UC-MSCs/ProcartaPlex Immunoassays                                                                                        | Detection of cytokines and growth factors involves in anti-inflammatory and tissue regeneration process.                            |
|                                              | Cytokine profiles from COPD patients' plasma                                | COPD patients' plasma/ ProcartaPlex Immunoassays                                                                         | Evaluation of cytokines involves in inflammatory response obtain from COPD patients' plasma before and after UC-MSC administration. |
|                                              | Interaction between UC-MSCs and COPD patients' lymphocytes                  | Media obtained from co-culture of UC-MSCs and peripheral mononuclear cells from COPD patients/ ProcartaPlex Immunoassays | Detection of cytokines involves in the anti-inflammatory functions of UC-MSCs.                                                      |



Figure 1

Figure 1: Schematic of the study. COPD patients will be screened to enroll in the study. Patients from the control group will be assigned to a patient from the UC-MSC group once they meet all matched criteria based on age ( $\pm 5$  years), gender, and COPD severity classification (GOLD 2019).

190x275mm (300 x 300 DPI)



Figure 2:

Figure 2: Standard COPD medication treatment for both groups according to GOLD 2019 and Vietnam Ministry of Health Guideline. Matched COPD patients will be treated using the same treatment based on their GOLD 2019 classification (Groups A, B, C, and D). Group A (not included in this study): a single bronchodilator will be used and based on the clinical assessments and persistence of the symptoms to continue/stop or replace by another bronchodilator. Group B: Single LAMA or LABA will be initially used. If the symptoms are not reduced, a combination of both LAMA and LABA will be applied. Group C: A single LAMA drug will be used for initial treatment. If exacerbations occur, LAMA and LABA combination will be applied as priority. The LAMA + ICS will be applied in specific cases based on clinical assessment, as the ICS has been reported to have severe side effects on lung inflammation. Group D: Should start the treatment with LAMA. If the patient has CAT > 20, LABA and LAMA will be used as initial treatment. LABA + ICS will be used as the initial treatment only when the patient has asthma COPD overlap or the patient's eosinophil level > 300. If exacerbation occurs after the initial treatment, the combination of LAMA, LABA, and ICS should be applied. Additional roflumilast should be used if FEV1 < 50% and the patient has chronic bronchitis. Macrolide should be used if the patient is a former smoker. The red arrow indicates priority



1  
2  
3  
4  
5  
6  
7  
8  
9  
10  
11  
12  
13  
14  
15  
16  
17  
18  
19  
20  
21  
22  
23  
24  
25  
26  
27  
28  
29  
30  
31  
32  
33  
34  
35  
36  
37  
38  
39  
40  
41  
42  
43  
44  
45  
46  
47  
48  
49  
50  
51  
52  
53  
54  
55  
56  
57  
58  
59  
60

treatment.

190x275mm (300 x 300 DPI)

# Reporting checklist for protocol of a clinical trial.

Based on the SPIRIT guidelines.

## Instructions to authors

Complete this checklist by entering the page numbers from your manuscript where readers will find each of the items listed below.

Your article may not currently address all the items on the checklist. Please modify your text to include the missing information. If you are certain that an item does not apply, please write "n/a" and provide a short explanation.

Upload your completed checklist as an extra file when you submit to a journal.

In your methods section, say that you used the SPIRIT reporting guidelines, and cite them as:

Chan A-W, Tetzlaff JM, Gøtzsche PC, Altman DG, Mann H, Berlin J, Dickersin K, Hróbjartsson A, Schulz KF, Parulekar WR, Krleža-Jerić K, Laupacis A, Moher D. SPIRIT 2013 Explanation and Elaboration: Guidance for protocols of clinical trials. *BMJ*. 2013;346:e7586

|                                             |                     | Reporting Item                                                                                               | Page Number |
|---------------------------------------------|---------------------|--------------------------------------------------------------------------------------------------------------|-------------|
| <b>Administrative information</b>           |                     |                                                                                                              |             |
| Title                                       | <a href="#">#1</a>  | Descriptive title identifying the study design, population, interventions, and, if applicable, trial acronym | 1           |
| Trial registration                          | <a href="#">#2a</a> | Trial identifier and registry name. If not yet registered, name of intended registry                         | 2           |
| Trial registration: data set                | <a href="#">#2b</a> | All items from the World Health Organization Trial Registration Data Set                                     | "n/a"       |
| Protocol version                            | <a href="#">#3</a>  | Date and version identifier                                                                                  | 2           |
| Funding                                     | <a href="#">#4</a>  | Sources and types of financial, material, and other support                                                  | 14          |
| Roles and responsibilities: contributorship | <a href="#">#5a</a> | Names, affiliations, and roles of protocol contributors                                                      | 14          |

|    |                           |                     |                                                                    |      |
|----|---------------------------|---------------------|--------------------------------------------------------------------|------|
| 1  | Roles and                 | <a href="#">#5b</a> | Name and contact information for the trial sponsor                 | 14   |
| 2  | responsibilities:         |                     |                                                                    |      |
| 3  | sponsor contact           |                     |                                                                    |      |
| 4  | information               |                     |                                                                    |      |
| 5  |                           |                     |                                                                    |      |
| 6  |                           |                     |                                                                    |      |
| 7  |                           |                     |                                                                    |      |
| 8  | Roles and                 | <a href="#">#5c</a> | Role of study sponsor and funders, if any, in study design;        | 14   |
| 9  | responsibilities:         |                     | collection, management, analysis, and interpretation of data;      |      |
| 10 | sponsor and funder        |                     | writing of the report; and the decision to submit the report for   |      |
| 11 |                           |                     | publication, including whether they will have ultimate authority   |      |
| 12 |                           |                     | over any of these activities                                       |      |
| 13 |                           |                     |                                                                    |      |
| 14 |                           |                     |                                                                    |      |
| 15 |                           |                     |                                                                    |      |
| 16 | Roles and                 | <a href="#">#5d</a> | Composition, roles, and responsibilities of the coordinating       | 14   |
| 17 | responsibilities:         |                     | centre, steering committee, endpoint adjudication committee,       |      |
| 18 | committees                |                     | data management team, and other individuals or groups              |      |
| 19 |                           |                     | overseeing the trial, if applicable (see Item 21a for data         |      |
| 20 |                           |                     | monitoring committee)                                              |      |
| 21 |                           |                     |                                                                    |      |
| 22 |                           |                     |                                                                    |      |
| 23 |                           |                     |                                                                    |      |
| 24 | <b>Introduction</b>       |                     |                                                                    |      |
| 25 |                           |                     |                                                                    |      |
| 26 |                           |                     |                                                                    |      |
| 27 | Background and            | <a href="#">#6a</a> | Description of research question and justification for undertaking | 4    |
| 28 | rationale                 |                     | the trial, including summary of relevant studies (published and    |      |
| 29 |                           |                     | unpublished) examining benefits and harms for each intervention    |      |
| 30 |                           |                     |                                                                    |      |
| 31 |                           |                     |                                                                    |      |
| 32 | Background and            | <a href="#">#6b</a> | Explanation for choice of comparators                              | 4-5  |
| 33 | rationale: choice of      |                     |                                                                    |      |
| 34 | comparators               |                     |                                                                    |      |
| 35 |                           |                     |                                                                    |      |
| 36 |                           |                     |                                                                    |      |
| 37 | Objectives                | <a href="#">#7</a>  | Specific objectives or hypotheses                                  | 5    |
| 38 |                           |                     |                                                                    |      |
| 39 |                           |                     |                                                                    |      |
| 40 | Trial design              | <a href="#">#8</a>  | Description of trial design including type of trial (eg, parallel  | 5, 6 |
| 41 |                           |                     | group, crossover, factorial, single group), allocation ratio, and  |      |
| 42 |                           |                     | framework (eg, superiority, equivalence, non-inferiority,          |      |
| 43 |                           |                     | exploratory)                                                       |      |
| 44 |                           |                     |                                                                    |      |
| 45 |                           |                     |                                                                    |      |
| 46 | <b>Methods:</b>           |                     |                                                                    |      |
| 47 | <b>Participants,</b>      |                     |                                                                    |      |
| 48 | <b>interventions, and</b> |                     |                                                                    |      |
| 49 | <b>outcomes</b>           |                     |                                                                    |      |
| 50 |                           |                     |                                                                    |      |
| 51 |                           |                     |                                                                    |      |
| 52 |                           |                     |                                                                    |      |
| 53 | Study setting             | <a href="#">#9</a>  | Description of study settings (eg, community clinic, academic      | 5, 6 |
| 54 |                           |                     | hospital) and list of countries where data will be collected.      |      |
| 55 |                           |                     | Reference to where list of study sites can be obtained             |      |
| 56 |                           |                     |                                                                    |      |
| 57 |                           |                     |                                                                    |      |
| 58 |                           |                     |                                                                    |      |
| 59 |                           |                     |                                                                    |      |
| 60 |                           |                     |                                                                    |      |

|    |                              |                      |                                                                                                                                                                                                                                                                                                                                                                                |       |
|----|------------------------------|----------------------|--------------------------------------------------------------------------------------------------------------------------------------------------------------------------------------------------------------------------------------------------------------------------------------------------------------------------------------------------------------------------------|-------|
| 1  | Eligibility criteria         | <a href="#">#10</a>  | Inclusion and exclusion criteria for participants. If applicable, eligibility criteria for study centres and individuals who will perform the interventions (eg, surgeons, psychotherapists)                                                                                                                                                                                   | 6,7   |
| 2  |                              |                      |                                                                                                                                                                                                                                                                                                                                                                                |       |
| 3  |                              |                      |                                                                                                                                                                                                                                                                                                                                                                                |       |
| 4  |                              |                      |                                                                                                                                                                                                                                                                                                                                                                                |       |
| 5  |                              |                      |                                                                                                                                                                                                                                                                                                                                                                                |       |
| 6  | Interventions:               | <a href="#">#11a</a> | Interventions for each group with sufficient detail to allow replication, including how and when they will be administered                                                                                                                                                                                                                                                     | 8     |
| 7  | description                  |                      |                                                                                                                                                                                                                                                                                                                                                                                |       |
| 8  |                              |                      |                                                                                                                                                                                                                                                                                                                                                                                |       |
| 9  |                              |                      |                                                                                                                                                                                                                                                                                                                                                                                |       |
| 10 | Interventions:               | <a href="#">#11b</a> | Criteria for discontinuing or modifying allocated interventions for a given trial participant (eg, drug dose change in response to harms, participant request, or improving / worsening disease)                                                                                                                                                                               | 8, 9  |
| 11 | modifications                |                      |                                                                                                                                                                                                                                                                                                                                                                                |       |
| 12 |                              |                      |                                                                                                                                                                                                                                                                                                                                                                                |       |
| 13 |                              |                      |                                                                                                                                                                                                                                                                                                                                                                                |       |
| 14 |                              |                      |                                                                                                                                                                                                                                                                                                                                                                                |       |
| 15 | Interventions:               | <a href="#">#11c</a> | Strategies to improve adherence to intervention protocols, and any procedures for monitoring adherence (eg, drug tablet return; laboratory tests)                                                                                                                                                                                                                              | 8, 9  |
| 16 | adherence                    |                      |                                                                                                                                                                                                                                                                                                                                                                                |       |
| 17 |                              |                      |                                                                                                                                                                                                                                                                                                                                                                                |       |
| 18 |                              |                      |                                                                                                                                                                                                                                                                                                                                                                                |       |
| 19 |                              |                      |                                                                                                                                                                                                                                                                                                                                                                                |       |
| 20 | Interventions:               | <a href="#">#11d</a> | Relevant concomitant care and interventions that are permitted or prohibited during the trial                                                                                                                                                                                                                                                                                  | 8, 9  |
| 21 | concomitant care             |                      |                                                                                                                                                                                                                                                                                                                                                                                |       |
| 22 |                              |                      |                                                                                                                                                                                                                                                                                                                                                                                |       |
| 23 |                              |                      |                                                                                                                                                                                                                                                                                                                                                                                |       |
| 24 | Outcomes                     | <a href="#">#12</a>  | Primary, secondary, and other outcomes, including the specific measurement variable (eg, systolic blood pressure), analysis metric (eg, change from baseline, final value, time to event), method of aggregation (eg, median, proportion), and time point for each outcome. Explanation of the clinical relevance of chosen efficacy and harm outcomes is strongly recommended | 9, 10 |
| 25 |                              |                      |                                                                                                                                                                                                                                                                                                                                                                                |       |
| 26 |                              |                      |                                                                                                                                                                                                                                                                                                                                                                                |       |
| 27 |                              |                      |                                                                                                                                                                                                                                                                                                                                                                                |       |
| 28 |                              |                      |                                                                                                                                                                                                                                                                                                                                                                                |       |
| 29 |                              |                      |                                                                                                                                                                                                                                                                                                                                                                                |       |
| 30 |                              |                      |                                                                                                                                                                                                                                                                                                                                                                                |       |
| 31 |                              |                      |                                                                                                                                                                                                                                                                                                                                                                                |       |
| 32 |                              |                      |                                                                                                                                                                                                                                                                                                                                                                                |       |
| 33 |                              |                      |                                                                                                                                                                                                                                                                                                                                                                                |       |
| 34 | Participant timeline         | <a href="#">#13</a>  | Time schedule of enrolment, interventions (including any run-ins and washouts), assessments, and visits for participants. A schematic diagram is highly recommended (see Figure)                                                                                                                                                                                               | 10    |
| 35 |                              |                      |                                                                                                                                                                                                                                                                                                                                                                                |       |
| 36 |                              |                      |                                                                                                                                                                                                                                                                                                                                                                                |       |
| 37 |                              |                      |                                                                                                                                                                                                                                                                                                                                                                                |       |
| 38 |                              |                      |                                                                                                                                                                                                                                                                                                                                                                                |       |
| 39 |                              |                      |                                                                                                                                                                                                                                                                                                                                                                                |       |
| 40 | Sample size                  | <a href="#">#14</a>  | Estimated number of participants needed to achieve study objectives and how it was determined, including clinical and statistical assumptions supporting any sample size calculations                                                                                                                                                                                          | 5,6   |
| 41 |                              |                      |                                                                                                                                                                                                                                                                                                                                                                                |       |
| 42 |                              |                      |                                                                                                                                                                                                                                                                                                                                                                                |       |
| 43 |                              |                      |                                                                                                                                                                                                                                                                                                                                                                                |       |
| 44 |                              |                      |                                                                                                                                                                                                                                                                                                                                                                                |       |
| 45 | Recruitment                  | <a href="#">#15</a>  | Strategies for achieving adequate participant enrolment to reach target sample size                                                                                                                                                                                                                                                                                            | 7,8   |
| 46 |                              |                      |                                                                                                                                                                                                                                                                                                                                                                                |       |
| 47 |                              |                      |                                                                                                                                                                                                                                                                                                                                                                                |       |
| 48 |                              |                      |                                                                                                                                                                                                                                                                                                                                                                                |       |
| 49 | <b>Methods: Assignment</b>   |                      |                                                                                                                                                                                                                                                                                                                                                                                |       |
| 50 | <b>of interventions (for</b> |                      |                                                                                                                                                                                                                                                                                                                                                                                |       |
| 51 | <b>controlled trials)</b>    |                      |                                                                                                                                                                                                                                                                                                                                                                                |       |
| 52 |                              |                      |                                                                                                                                                                                                                                                                                                                                                                                |       |
| 53 |                              |                      |                                                                                                                                                                                                                                                                                                                                                                                |       |
| 54 | Allocation: sequence         | <a href="#">#16a</a> | Method of generating the allocation sequence (eg, computer-generated random numbers), and list of any factors for stratification. To reduce predictability of a random sequence, details of any planned restriction (eg, blocking) should be                                                                                                                                   | "n/a" |
| 55 | generation                   |                      |                                                                                                                                                                                                                                                                                                                                                                                |       |
| 56 |                              |                      |                                                                                                                                                                                                                                                                                                                                                                                |       |
| 57 |                              |                      |                                                                                                                                                                                                                                                                                                                                                                                |       |
| 58 |                              |                      |                                                                                                                                                                                                                                                                                                                                                                                |       |
| 59 |                              |                      |                                                                                                                                                                                                                                                                                                                                                                                |       |
| 60 |                              |                      |                                                                                                                                                                                                                                                                                                                                                                                |       |

provided in a separate document that is unavailable to those who enrol participants or assign interventions

|    |                        |                      |                                                                     |
|----|------------------------|----------------------|---------------------------------------------------------------------|
| 1  |                        |                      |                                                                     |
| 2  |                        |                      |                                                                     |
| 3  |                        |                      |                                                                     |
| 4  | Allocation             | <a href="#">#16b</a> | Mechanism of implementing the allocation sequence (eg, central      |
| 5  | concealment            |                      | telephone; sequentially numbered, opaque, sealed envelopes),        |
| 6  |                        |                      | describing any steps to conceal the sequence until interventions    |
| 7  | mechanism              |                      | are assigned                                                        |
| 8  |                        |                      |                                                                     |
| 9  |                        |                      |                                                                     |
| 10 |                        |                      |                                                                     |
| 11 | Allocation:            | <a href="#">#16c</a> | Who will generate the allocation sequence, who will enrol           |
| 12 | implementation         |                      | participants, and who will assign participants to interventions     |
| 13 |                        |                      |                                                                     |
| 14 | Blinding (masking)     | <a href="#">#17a</a> | Who will be blinded after assignment to interventions (eg, trial    |
| 15 |                        |                      | participants, care providers, outcome assessors, data analysts),    |
| 16 |                        |                      | and how                                                             |
| 17 |                        |                      |                                                                     |
| 18 |                        |                      |                                                                     |
| 19 |                        |                      |                                                                     |
| 20 | Blinding (masking):    | <a href="#">#17b</a> | If blinded, circumstances under which unblinding is permissible,    |
| 21 | emergency unblinding   |                      | and procedure for revealing a participant's allocated intervention  |
| 22 |                        |                      | during the trial                                                    |
| 23 |                        |                      |                                                                     |
| 24 |                        |                      |                                                                     |
| 25 | <b>Methods: Data</b>   |                      |                                                                     |
| 26 | <b>collection,</b>     |                      |                                                                     |
| 27 | <b>management, and</b> |                      |                                                                     |
| 28 | <b>analysis</b>        |                      |                                                                     |
| 29 |                        |                      |                                                                     |
| 30 |                        |                      |                                                                     |
| 31 |                        |                      |                                                                     |
| 32 | Data collection plan   | <a href="#">#18a</a> | Plans for assessment and collection of outcome, baseline, and       |
| 33 |                        |                      | other trial data, including any related processes to promote data   |
| 34 |                        |                      | quality (eg, duplicate measurements, training of assessors) and a   |
| 35 |                        |                      | description of study instruments (eg, questionnaires, laboratory    |
| 36 |                        |                      | tests) along with their reliability and validity, if known.         |
| 37 |                        |                      | Reference to where data collection forms can be found, if not in    |
| 38 |                        |                      | the protocol                                                        |
| 39 |                        |                      |                                                                     |
| 40 |                        |                      |                                                                     |
| 41 |                        |                      |                                                                     |
| 42 |                        |                      |                                                                     |
| 43 | Data collection plan:  | <a href="#">#18b</a> | Plans to promote participant retention and complete follow-up,      |
| 44 | retention              |                      | including list of any outcome data to be collected for participants |
| 45 |                        |                      | who discontinue or deviate from intervention protocols              |
| 46 |                        |                      |                                                                     |
| 47 |                        |                      |                                                                     |
| 48 | Data management        | <a href="#">#19</a>  | Plans for data entry, coding, security, and storage, including any  |
| 49 |                        |                      | related processes to promote data quality (eg, double data entry;   |
| 50 |                        |                      | range checks for data values). Reference to where details of data   |
| 51 |                        |                      | management procedures can be found, if not in the protocol          |
| 52 |                        |                      |                                                                     |
| 53 |                        |                      |                                                                     |
| 54 |                        |                      |                                                                     |
| 55 | Statistics: outcomes   | <a href="#">#20a</a> | Statistical methods for analysing primary and secondary             |
| 56 |                        |                      | outcomes. Reference to where other details of the statistical       |
| 57 |                        |                      | analysis plan can be found, if not in the protocol                  |
| 58 |                        |                      |                                                                     |
| 59 |                        |                      |                                                                     |
| 60 |                        |                      |                                                                     |

|    |                            |                      |                                                                    |        |
|----|----------------------------|----------------------|--------------------------------------------------------------------|--------|
| 1  | Statistics: additional     | <a href="#">#20b</a> | Methods for any additional analyses (eg, subgroup and adjusted     | 10     |
| 2  | analyses                   |                      | analyses)                                                          |        |
| 3  |                            |                      |                                                                    |        |
| 4  | Statistics: analysis       | <a href="#">#20c</a> | Definition of analysis population relating to protocol non-        | 10     |
| 5  | population and missing     |                      | adherence (eg, as randomised analysis), and any statistical        |        |
| 6  | data                       |                      | methods to handle missing data (eg, multiple imputation)           |        |
| 7  |                            |                      |                                                                    |        |
| 8  |                            |                      |                                                                    |        |
| 9  |                            |                      |                                                                    |        |
| 10 | <b>Methods: Monitoring</b> |                      |                                                                    |        |
| 11 |                            |                      |                                                                    |        |
| 12 | Data monitoring:           | <a href="#">#21a</a> | Composition of data monitoring committee (DMC); summary of         | 10     |
| 13 | formal committee           |                      | its role and reporting structure; statement of whether it is       |        |
| 14 |                            |                      | independent from the sponsor and competing interests; and          |        |
| 15 |                            |                      | reference to where further details about its charter can be found, |        |
| 16 |                            |                      | if not in the protocol. Alternatively, an explanation of why a     |        |
| 17 |                            |                      | DMC is not needed                                                  |        |
| 18 |                            |                      |                                                                    |        |
| 19 |                            |                      |                                                                    |        |
| 20 |                            |                      |                                                                    |        |
| 21 |                            |                      |                                                                    |        |
| 22 | Data monitoring:           | <a href="#">#21b</a> | Description of any interim analyses and stopping guidelines,       | 10     |
| 23 | interim analysis           |                      | including who will have access to these interim results and make   |        |
| 24 |                            |                      | the final decision to terminate the trial                          |        |
| 25 |                            |                      |                                                                    |        |
| 26 |                            |                      |                                                                    |        |
| 27 | Harms                      | <a href="#">#22</a>  | Plans for collecting, assessing, reporting, and managing solicited | 9      |
| 28 |                            |                      | and spontaneously reported adverse events and other unintended     |        |
| 29 |                            |                      | effects of trial interventions or trial conduct                    |        |
| 30 |                            |                      |                                                                    |        |
| 31 |                            |                      |                                                                    |        |
| 32 |                            |                      |                                                                    |        |
| 33 | Auditing                   | <a href="#">#23</a>  | Frequency and procedures for auditing trial conduct, if any, and   | 9, 10  |
| 34 |                            |                      | whether the process will be independent from investigators and     |        |
| 35 |                            |                      | the sponsor                                                        |        |
| 36 |                            |                      |                                                                    |        |
| 37 |                            |                      |                                                                    |        |
| 38 | <b>Ethics and</b>          |                      |                                                                    |        |
| 39 | <b>dissemination</b>       |                      |                                                                    |        |
| 40 |                            |                      |                                                                    |        |
| 41 |                            |                      |                                                                    |        |
| 42 | Research ethics            | <a href="#">#24</a>  | Plans for seeking research ethics committee / institutional review | 10     |
| 43 | approval                   |                      | board (REC / IRB) approval                                         |        |
| 44 |                            |                      |                                                                    |        |
| 45 |                            |                      |                                                                    |        |
| 46 | Protocol amendments        | <a href="#">#25</a>  | Plans for communicating important protocol modifications (eg,      | 10, 11 |
| 47 |                            |                      | changes to eligibility criteria, outcomes, analyses) to relevant   |        |
| 48 |                            |                      | parties (eg, investigators, REC / IRBs, trial participants, trial  |        |
| 49 |                            |                      | registries, journals, regulators)                                  |        |
| 50 |                            |                      |                                                                    |        |
| 51 |                            |                      |                                                                    |        |
| 52 |                            |                      |                                                                    |        |
| 53 | Consent or assent          | <a href="#">#26a</a> | Who will obtain informed consent or assent from potential trial    | 5, 6   |
| 54 |                            |                      | participants or authorised surrogates, and how (see Item 32)       |        |
| 55 |                            |                      |                                                                    |        |
| 56 |                            |                      |                                                                    |        |
| 57 |                            |                      |                                                                    |        |
| 58 |                            |                      |                                                                    |        |
| 59 |                            |                      |                                                                    |        |
| 60 |                            |                      |                                                                    |        |

|    |                          |                      |                                                                      |         |
|----|--------------------------|----------------------|----------------------------------------------------------------------|---------|
| 1  | Consent or assent:       | <a href="#">#26b</a> | Additional consent provisions for collection and use of              | 5,6     |
| 2  | ancillary studies        |                      | participant data and biological specimens in ancillary studies, if   |         |
| 3  |                          |                      | applicable                                                           |         |
| 4  |                          |                      |                                                                      |         |
| 5  |                          |                      |                                                                      |         |
| 6  | Confidentiality          | <a href="#">#27</a>  | How personal information about potential and enrolled                | 10      |
| 7  |                          |                      | participants will be collected, shared, and maintained in order to   |         |
| 8  |                          |                      | protect confidentiality before, during, and after the trial          |         |
| 9  |                          |                      |                                                                      |         |
| 10 |                          |                      |                                                                      |         |
| 11 | Declaration of interests | <a href="#">#28</a>  | Financial and other competing interests for principal investigators  | 14      |
| 12 |                          |                      | for the overall trial and each study site                            |         |
| 13 |                          |                      |                                                                      |         |
| 14 |                          |                      |                                                                      |         |
| 15 | Data access              | <a href="#">#29</a>  | Statement of who will have access to the final trial dataset, and    | 10      |
| 16 |                          |                      | disclosure of contractual agreements that limit such access for      |         |
| 17 |                          |                      | investigators                                                        |         |
| 18 |                          |                      |                                                                      |         |
| 19 |                          |                      |                                                                      |         |
| 20 | Ancillary and post trial | <a href="#">#30</a>  | Provisions, if any, for ancillary and post-trial care, and for       | "n/a"   |
| 21 | care                     |                      | compensation to those who suffer harm from trial participation       |         |
| 22 |                          |                      |                                                                      |         |
| 23 |                          |                      |                                                                      |         |
| 24 | Dissemination policy:    | <a href="#">#31a</a> | Plans for investigators and sponsor to communicate trial results     | 10      |
| 25 | trial results            |                      | to participants, healthcare professionals, the public, and other     |         |
| 26 |                          |                      | relevant groups (eg, via publication, reporting in results           |         |
| 27 |                          |                      | databases, or other data sharing arrangements), including any        |         |
| 28 |                          |                      | publication restrictions                                             |         |
| 29 |                          |                      |                                                                      |         |
| 30 |                          |                      |                                                                      |         |
| 31 |                          |                      |                                                                      |         |
| 32 |                          |                      |                                                                      |         |
| 33 | Dissemination policy:    | <a href="#">#31b</a> | Authorship eligibility guidelines and any intended use of            | 14      |
| 34 | authorship               |                      | professional writers                                                 |         |
| 35 |                          |                      |                                                                      |         |
| 36 |                          |                      |                                                                      |         |
| 37 | Dissemination policy:    | <a href="#">#31c</a> | Plans, if any, for granting public access to the full protocol,      | "n/a"   |
| 38 | reproducible research    |                      | participant-level dataset, and statistical code                      |         |
| 39 |                          |                      |                                                                      |         |
| 40 |                          |                      |                                                                      |         |
| 41 | <b>Appendices</b>        |                      |                                                                      |         |
| 42 |                          |                      |                                                                      |         |
| 43 | Informed consent         | <a href="#">#32</a>  | Model consent form and other related documentation given to          | "n/a"   |
| 44 | materials                |                      | participants and authorised surrogates                               |         |
| 45 |                          |                      |                                                                      |         |
| 46 |                          |                      |                                                                      |         |
| 47 | Biological specimens     | <a href="#">#33</a>  | Plans for collection, laboratory evaluation, and storage of          | Table 2 |
| 48 |                          |                      | biological specimens for genetic or molecular analysis in the        |         |
| 49 |                          |                      | current trial and for future use in ancillary studies, if applicable |         |
| 50 |                          |                      |                                                                      |         |
| 51 |                          |                      |                                                                      |         |

The SPIRIT checklist is distributed under the terms of the Creative Commons Attribution License CC-BY-ND 3.0. This checklist was completed on 12. October 2020 using <https://www.goodreports.org/>, a tool made by the [EQUATOR Network](#) in collaboration with [Penelope.ai](#)

# BMJ Open

## Allogeneic human umbilical cord-derived mesenchymal stem/stromal cells for chronic obstructive pulmonary disease (COPD): study protocol for a matched case-control, phase I/II trial

|                                 |                                                                                                                                                                                                                                                                                                                                                                                                                                                                                                                                                                                     |
|---------------------------------|-------------------------------------------------------------------------------------------------------------------------------------------------------------------------------------------------------------------------------------------------------------------------------------------------------------------------------------------------------------------------------------------------------------------------------------------------------------------------------------------------------------------------------------------------------------------------------------|
| Journal:                        | <i>BMJ Open</i>                                                                                                                                                                                                                                                                                                                                                                                                                                                                                                                                                                     |
| Manuscript ID                   | bmjopen-2020-045788.R2                                                                                                                                                                                                                                                                                                                                                                                                                                                                                                                                                              |
| Article Type:                   | Protocol                                                                                                                                                                                                                                                                                                                                                                                                                                                                                                                                                                            |
| Date Submitted by the Author:   | 16-Apr-2021                                                                                                                                                                                                                                                                                                                                                                                                                                                                                                                                                                         |
| Complete List of Authors:       | Hoang, Duc M.; Vinmec Health Care System, Vinmec Research Institute of Stem Cell and Gene Technology, Cellular Manufacturing Department<br>Nguyen, Kien T.; Vinmec Health Care System, Vinmec Research Institute of Stem Cell and Gene Technology, Scientific Research Department<br>Nguyen, Anh H.; Vinmec Times City International Hospital, Department of Internal Medicine<br>Nguyen, Bach N.; Vinmec Times City International Hospital, Department of Internal Medicine<br>Nguyen, Liem; Vinmec Health Care System, Vinmec Research Institute of Stem Cell and Gene Technology |
| <b>Primary Subject Heading</b>: | Respiratory medicine                                                                                                                                                                                                                                                                                                                                                                                                                                                                                                                                                                |
| Secondary Subject Heading:      | Research methods                                                                                                                                                                                                                                                                                                                                                                                                                                                                                                                                                                    |
| Keywords:                       | Transplant medicine < INTERNAL MEDICINE, RESPIRATORY MEDICINE (see Thoracic Medicine), Chronic airways disease < THORACIC MEDICINE                                                                                                                                                                                                                                                                                                                                                                                                                                                  |
|                                 |                                                                                                                                                                                                                                                                                                                                                                                                                                                                                                                                                                                     |

SCHOLARONE™  
Manuscripts





I, the Submitting Author has the right to grant and does grant on behalf of all authors of the Work (as defined in the below author licence), an exclusive licence and/or a non-exclusive licence for contributions from authors who are: i) UK Crown employees; ii) where BMJ has agreed a CC-BY licence shall apply, and/or iii) in accordance with the terms applicable for US Federal Government officers or employees acting as part of their official duties; on a worldwide, perpetual, irrevocable, royalty-free basis to BMJ Publishing Group Ltd ("BMJ") its licensees and where the relevant Journal is co-owned by BMJ to the co-owners of the Journal, to publish the Work in this journal and any other BMJ products and to exploit all rights, as set out in our [licence](#).

The Submitting Author accepts and understands that any supply made under these terms is made by BMJ to the Submitting Author unless you are acting as an employee on behalf of your employer or a postgraduate student of an affiliated institution which is paying any applicable article publishing charge ("APC") for Open Access articles. Where the Submitting Author wishes to make the Work available on an Open Access basis (and intends to pay the relevant APC), the terms of reuse of such Open Access shall be governed by a Creative Commons licence – details of these licences and which [Creative Commons](#) licence will apply to this Work are set out in our licence referred to above.

Other than as permitted in any relevant BMJ Author's Self Archiving Policies, I confirm this Work has not been accepted for publication elsewhere, is not being considered for publication elsewhere and does not duplicate material already published. I confirm all authors consent to publication of this Work and authorise the granting of this licence.

1  
2  
3 **Allogeneic human umbilical cord-derived mesenchymal stem/stromal cells for chronic obstructive pulmonary**  
4 **disease (COPD): study protocol for a matched case-control, phase I/II trial.**  
5

6 Duc M. Hoang<sup>1\*</sup>, Kien T. Nguyen<sup>1\*</sup>, Anh H. Nguyen<sup>2</sup>, Bach N. Nguyen<sup>2</sup>, Liem Nguyen Thanh<sup>\*1</sup>.  
7

8 \*These authors contributed equally to the work.  
9

10 <sup>1</sup>Vinmec Research Institute of Stem Cell and Gene Technology, Hanoi, Vietnam.  
11

12 <sup>2</sup> Department of Internal Medicine, Vinmec Times City International Hospital, Hanoi, Vietnam.  
13

14 Correspondence to: Dr Duc M. Hoang. Email: [v.duchm3@vinmec.com](mailto:v.duchm3@vinmec.com), Department of Cellular Manufacturing,  
15 Vinmec Research Institute of Stem Cell and Gene Technology, Vinmec Health Care System, Hanoi, Vietnam.  
16  
17

18  
19 **Keywords:** Umbilical cord-derived Mesenchymal Stem/stromal Cells, Chronic Obstructive Pulmonary Disease  
20 (COPD), allogeneic MSC administration, clinical trial.  
21  
22

23 **Word count:** 5599 words  
24  
25  
26  
27  
28  
29  
30  
31  
32  
33  
34  
35  
36  
37  
38  
39  
40  
41  
42  
43  
44  
45  
46  
47  
48  
49  
50  
51  
52  
53  
54  
55  
56  
57  
58  
59  
60

1  
2  
3 **1 Abstract**

4  
5 **2 Introduction**

6  
7 3 The global prevalence of chronic obstructive pulmonary disease (COPD) is increasing, and it has become a  
8 4 major public health burden worldwide, including in Vietnam. A large body of preclinical and clinical studies  
9 5 supports the safety of mesenchymal stem/stromal cells (MSCs) in the treatment of lung injury, including COPD. The  
10 6 aim of this trial is to investigate the safety and potential therapeutic efficacy of allogeneic administration of  
11 7 umbilical cord-derived MSCs (UC-MSCs) as a supplementary intervention in combination with standard COPD  
12 8 medication treatments in patients with moderate-to-severe COPD based on the Global Initiative for Chronic  
13 9 Obstructive Lung Disease (GOLD) 2019 and Vietnam Ministry of Health's guidelines.

14  
15  
16  
17  
18 **10 Methods and analysis**

19  
20 11 This matched case-control phase I/II trial is conducted at Vinmec Times City International Hospital, Hanoi,  
21 12 Vietnam between June 2020 and December 2021. In this study, 40 patients will be enrolled and assigned into two  
22 13 age-, gender- and COPD condition-matched groups, including a UC-MSC group and a control group. Both groups  
23 14 will receive standard COPD medication treatment based on the GOLD 2019 guidelines and the Vietnam Ministry of  
24 15 Health protocol. The UC-MSC group will receive two doses of thawed UC-MSC product with an intervention  
25 16 interval of 3 months. The primary outcome measures will include the incidence of prespecified administration-  
26 17 associated adverse events (AEs) and serious adverse events (SAEs). The efficacy will be evaluated based on the  
27 18 absolute changes in the number of admissions, arterial blood gas analysis, lung function and lung fibrosis via CT  
28 19 scan and chest X-ray. The clinical evaluation will be conducted at baseline and 3, 6, and 12 months post  
29 20 intervention.

30  
31  
32  
33  
34  
35 **21 Ethics and dissemination**

36  
37 22 Ethical approval was secured from the Ethical Committee of Vinmec International Hospital  
38 23 (number:166/2019/QĐ-VMC) and Vietnam Ministry of Health (number:2002/QĐ-BYT). The results will be  
39 24 reported to trial collaborators, publication in peer-reviewed academic journals.

40  
41  
42 **25 Trial registration number:**NCT04433104.  
43  
44  
45  
46  
47  
48  
49  
50  
51  
52  
53  
54  
55  
56  
57  
58  
59  
60

### Strengths and Limitations

- This project is the first matched case-control phase I/II study to evaluate the safety and efficacy of allogeneic administration of UC-MSCs as supplementary treatment in combination with standard medication treatments for patients with moderate-to-severe COPD.
- To address the challenge of evaluating the effectiveness of MSC treatment in COPD by using quantitative and qualitative research methods.
- To interlink the treatment effectiveness with stem cell phenotype analysis to broaden our understanding of UC-MSC effects in COPD.
- The limitation of this study is that it was not conducted as a randomized control trial due to the complexity of the process and patient recruitment as well as the challenges of undertaking clinical trials in COPD patients due to the heterogeneity of disease mechanisms and phenotypic expression.

## 1 Introduction

2 Chronic obstructive pulmonary disease (COPD) is described – but not defined – as one of the major chronic  
3 lung diseases characterized by persistent and progressive airflow obstruction. It is caused by an elevated chronic  
4 pulmonary inflammatory response in the airways and bronchial structure to noxious particles or gases. The  
5 pathological hallmarks of the disease include obstructive bronchiolitis, emphysema, and mucus hypersecretion<sup>1</sup>.  
6 Despite many medical advancements and technological improvements, our understanding of the pathological  
7 mechanisms underlying the progressive and detrimental development of COPD remains incomplete, the definition of  
8 the disease is controversial, diagnostic tests are inaccurate and unstandardized, and the treatment is inadequate<sup>2</sup>. A  
9 recent report stated that the global prevalence of COPD increased by 44% within the last 20 years, and more than 3.2  
10 million patients died each year from COPD worldwide (accounting for approximately 5% of all deaths globally per  
11 year)<sup>3</sup>. In Vietnam, according to the WHO report, 7.1% of males and 1.9% of females aged 40 and above are diagnosed  
12 with COPD. Consequently, approximately 25% of hospital beds in respiratory wards are required for COPD patients,  
13 resulting in a heavy burden to Vietnamese Medical Infrastructure and reducing patients' health and quality of life<sup>4</sup>.  
14 The current pharmacological medications for COPD include the use of inhaled bronchodilator drugs, such as long-  
15 acting  $\beta$  agonists (LABAs) and long-acting muscarinic antagonists (LAMAs), the use of inhaled corticosteroids (ICSs)  
16 or a combination of these medications. Although it is generally accepted that pharmacological interventions via  
17 inhalation would allow the accurate delivery of drugs and increase the clinical benefits, incorrect inhaler technique  
18 and a lack of adherence when feeling healthy caused worse dyspnea, impaired health condition, and increased the  
19 frequency of exacerbations and hospitalizations in Vietnamese COPD patients<sup>5</sup>. Therefore, identifying novel effective  
20 therapies for COPD patients is urgent and important.

21 Since their first discovery in 1968, mesenchymal stem/stromal cells (MSCs) have been intensively studied  
22 because of their therapeutic and regenerative features. The nomenclature of MSCs has been debated recently due to  
23 not only the biological features of the MSCs themselves but also the medical abuse of the term “stem cells” inferring  
24 direct medical benefit<sup>6</sup>. To standardize the characterization of MSCs and facilitate their therapeutic implications, the  
25 International Society for Cellular Therapy (ISCT) has proposed the minimum criteria to define human MSCs<sup>7,8</sup>. In  
26 our study, MSCs were defined as mesenchymal stem/stromal cells, which are a class of adult mesenchymal progenitor  
27 cells derived from either bone marrow, adipose, or umbilical cord tissue and met the minimum criteria of ISCT.  
28 Among various sources of MSCs, human umbilical cord-derived MSCs (hUC-MSCs) are potentially more advanced  
29 than their adult counterparts (bone marrow or adipose) for several reasons: (1) ease of collection as it is a noninvasive  
30 process, (2) waiving ethical barriers as UC is medical waste discarded at birth, (3) rapid proliferation rate, (4)  
31 maintenance of normal karyotype during prolonged culture *in vitro*, and (4) higher paracrine potency than adult tissue-  
32 derived MSCs<sup>9</sup>. The therapeutic potential of hUC-MSCs has been proven in clinical studies, especially animal  
33 pulmonary disease models, including acute respiratory distress syndrome (ARDS), bronchopulmonary dysplasia  
34 (BPD), and COPD. It has been reported that UC-MSCs are effective in reducing lung inflammation and fibrosis  
35 processes, preventing secondary infection, decreasing immune system damage, increasing bronchoalveolar fluid  
36 clearance, and enhancing the regeneration of alveolar epithelium layers<sup>10-12</sup>. The majority of intravenously

1  
2  
3 1 administered MSCs reportedly remain in the lung, especially pulmonary microvessels, which potentially contribute to  
4 2 their beneficial effects in pulmonary disease models<sup>13</sup>. Hence, the safety and therapeutic effects of UC-MSC  
5 3 administration for COPD require further investigation and clarification.

6  
7  
8 4 To date, five completed clinical trials have used bone marrow mononuclear cells (BMMCs), bone marrow-  
9 5 derived MSCs (BM-MSCs), and UC-MSCs in COPD<sup>14-19</sup>. Although these clinical trials provided an enormous amount  
10 6 of data supporting the safety of the therapy in the treatment of COPDs, the efficacy of the treatments remained  
11 7 controversial due to several limitations, including trial design, lack of standardization of cell numbers administered to  
12 8 patients, timing of MSC administration, and, most importantly, the lack of a control group in several studies. Moreover,  
13 9 the variations in patient selection based on the severity and stage of COPD could be attributed to the effectiveness of  
14 10 the cell therapy, resulting in caution in data interpretation. Last but not least, the quality of administered MSCs also  
15 11 plays a significant role in the effectiveness of the treatment, i.e., the status of the cells (fresh culture vs. frozen cells),  
16 12 cell sources (from young healthy donors or aging individuals), dosage frequency, etc. Therefore, identification of the  
17 13 potential sources of MSCs (such as UC-MSCs), larger sample size with matched controls, and standardized  
18 14 classification of COPD using international accepted criteria is required to further investigate the safety and efficacy  
19 15 of MSC therapy. Based on preclinical studies and previous promising findings, we designed a matched control phase  
20 16 I/II clinical trial to evaluate the safety and potential efficacy of the intravenous infusion of allogeneic hUC-MSCs in  
21 17 patients with COPD characterized based on the Global Initiative for Chronic Obstructive Lung Disease (GOLD) 2019  
22 18 criteria<sup>20</sup>.

## 23 19 **Methods and analysis**

### 24 20 ***Study objectives***

25 21 The aim of this trial is to evaluate the safety and potential efficacy of allogeneic UC-MSC administration in patients  
26 22 with COPD. There are three specific objectives:

- 27 23 1. Evaluate the safety and potential therapeutic effectiveness of intravenously (IV) administered UC-MSCs in  
28 24 patients with COPD.
- 29 25 2. To prove the hypothesis that IV administration of UC-MSCs can improve lung function and reduce  
30 26 inflammatory responses in the lungs and fibrosis.
- 31 27 3. Explore the potential therapeutic mechanism of UC-MSCs in the treatment of COPD.

### 32 28 ***Study design and ethics***

33 29 This matched case-control phase I/II clinical trial was approved by the Ethical Committee of Vinmec  
34 30 International Hospital (number: 166/2019/QĐ-VMC) and Vietnam Ministry of Health (number: 2002/QĐ-BYT).  
35 31 This study was registered at ClinicalTrials.gov (number NCT04433104). To achieve the aims, a total of 40 patients  
36 32 with COPD will be recruited at the Internal Medicine Department at Vinmec Times City International Hospital, Hanoi,  
37 33 Vietnam, between June 2020 and December 2021. A flowchart of the study design is shown in Figure 1.

### 38 34 ***Sample size***

1  
2  
3 1 As a previous study indicated that the FEV<sub>1</sub> (%) of COPD patients was reduced to 35.4±7.1% (6% reduction)  
4 2 after 6 months post-administration, we set this indicator at 18% reduction after 12 months post-administration to  
5 3 calculate the minimum sample size for the proposed study<sup>18 21</sup>. According to the continuous endpoint of two  
6 4 independent sample studies<sup>22</sup>, we assumed  $\alpha$  was 0.05 and type-II error  $\beta$  was 0.2; thus, the smallest sample size was  
7 5 40 patients. The calculated sample size was 20 for each group.  
8  
9

#### 10 11 ***Matching strategy:*** 12

13 7 The patients from the control group will be assigned to a patient from the MSC group once they meet all  
14 8 matched criteria based on age ( $\pm 5$  years), gender, and COPD severity classification (GOLD 2019). Patients from both  
15 9 groups will receive standard COPD medication management according to their COPD severity classification and based  
16 10 on the Vietnam Ministry of Health guideline for COPD treatment, as shown in Figure 2 and Table 1.  
17

18  
19 11 A total of 40 patients will be recruited and assigned to the UC-MSC administration group (20 patients) and the  
20 12 control group (20 patients). The trial contains two phases: (1) the first phase will include recruiting and evaluating the  
21 13 first 5 patients from each group to assess the safety of UC-MSC administration after 1 month of follow-up, and (2)  
22 14 the second phase will be initiated after the 1<sup>st</sup> phase safety report is approved by the Ethical Committee of Vinmec  
23 15 International Hospital and Vietnam Ministry of Health to start recruiting the remaining 15 patients from each group  
24 16 to evaluate both safety and efficacy of the treatment.  
25  
26  
27  
28

#### 29 ***Participants*** 30

31 18 The principal investigators, research and clinician team members are responsible for the study design, patient  
32 19 screening, recruitment, conduct, and perform follow-up assessments in the trial. Participants will be allowed to enroll  
33 20 or withdraw at any time throughout the study. The participants will have all screening and testing costs related to the  
34 21 trials waived except for the costs of COPD medications or drugs. All participants' information will be protected by  
35 22 coding and restricted access using a computer-based system. Participants will be enrolled in the study once they meet  
36 23 all inclusion and exclusion criteria.  
37  
38  
39

#### 40 ***Inclusion and exclusion criteria*** 41

42 25 The diagnostic criteria and severity classification of COPD refers to the criteria established by the COPD 2019  
43 26 guidelines<sup>20</sup>. Patients will be asked to confirm the COPD conditions and classification from national hospitals and  
44 27 send the results to the administration office prior to enrollment in the trial for prescreening. Patients will be enrolled  
45 28 in the study in compliance with the inclusion and exclusion criteria established by a screening protocol as presented  
46 29 below.  
47  
48  
49

#### 50 ***Inclusion Criteria*** 51

- 52 31 ▪ Diagnosed with COPD with stage B, C, or D according to GOLD 2019.
- 53 32 ▪ Age between 40-75 years old.
- 54 33 ▪ Both genders.
- 55 34
- 56 35
- 57 36
- 58 37
- 59 38
- 60 39

### ***Exclusion Criteria***

- Smoker or less than 6 months of smoking cessation time.
- Asthma and other pulmonary-related diseases and injuries (including lung tuberculosis, restrictive lung disease, idiopathic pulmonary fibrosis, or lung cancer).
- Acute and/or active infection.
- Cancer.
- Patients with complex cardiovascular diseases (including valvular heart disease, cardiomyopathy, arrhythmia, congenital heart disease, hypertrophy syndrome).
- Liver and kidney failure.
- Pregnancy.
- Patients with life expectancy less than 6 months due to concomitant illness.
- Under immunosuppressive treatment within 8 weeks of the first screening visit.
- Patient diagnosed diabetes with HbA<sub>1C</sub>>7%.

### ***Recruitment***

Patients can only enroll in this study after passing the prescreening process, consultation resolution, and signing the informed consent form.

The recruitment campaign will target three main sources. First, potentially eligible hospitalized patients diagnosed with severe COPD will be approached and asked to participate in the study. Second, physicians will generate lists of patients from the electronic medical system of Vinmec Times City International Hospital with a diagnosis of COPD based on severity classification matching the GOLD 2019 criteria who were discharged within 2 years. Investigators or physicians will contact patients by telephone or mail them a research leaflet and recruitment letter. Third, leaflet and trial recruitment letters will be posted in the Vingroup cooperation internal email system, the official website, and the Facebook public platform of the Vinmec Healthcare system for those diagnosed with COPD GOLD 2019 (B, C, D) at other hospitals. If the patients are interested in this research, we will ask them to send the prescreen results to the administration office.

A multidisciplinary consultation will be held to evaluate the prescreening results from participants to confirm whether these potential participants meet the general diagnostic criteria of COPD, including inclusion and exclusion criteria. The consultation includes physicians and experts from respiratory, radiology, laboratory, and stem cell biology fields. If more than 80% of experts agree on the prescreening results, patients will be viewed as potential participants. The researchers will set an appointment to communicate with the potential candidates about the clinical trial details, including pros and cons of stem cell treatments and sign the written informed consent form prior to assigning patients to either stem cell administration or control groups.

The details of the clinical trial will be explained to patients by investigators or physicians as follows: (1) the study aims and scope, (2) background of COPD and UC-MSc, (3) number of participants, study duration, and classification into either MSc administration or control group, (4) study procedure (including screening, COPD



1 medication management, follow-up tests), (5) potential discomfort and risks of MSC administration (including  
2 prespecified adverse and severe adverse events), (6) expected outcomes of the treatment (primary safety evaluation  
3 and potential therapeutic improvement of both MSC administration and COPD medication management according to  
4 Vietnam Ministry of Health guideline), (7) protection policy of patients' information and privacy, and (8) voluntary  
5 participation (right and responsibility of patients). Patients will only sign written informed consent when all the above  
6 items are fully explained and the patients fully understand the protocol. The patients' baseline characteristics will be  
7 assessed by the clinicians within 30 days prior to UC-MSC administration for patients in the MSC administration  
8 group (Table 2).

### 9 ***Intervention***

10 30 Umbilical cord (UC) samples were obtained from healthy women with an uncomplicated, at term pregnancy  
11 who underwent serological testing, including tests for HIV, cytomegalovirus (CMV), Epstein-Barr virus (EBV),  
12 hepatitis A virus (HAV), hepatitis B virus (HBV), hepatitis C virus (HCV), syphilis, and chlamydia, at 38 weeks of  
13 pregnancy, as shown in previous study<sup>23</sup>. The UC tissues were collected at delivery and transferred to the Stem Cell  
14 Core Facility at the Vinmec Research Institute of Stem Cell and Gene Technology under ISO 14644-1 (certification  
15 number: CR61119-1). To generate a UC-MSC line for the current study, a single eligible UC tissue will be processed,  
16 isolated and cultured under xeno-free and serum-free conditions as previously described<sup>23</sup>. UC-MSCs will be  
17 expanded under these conditions to passage 5 (P5) and cryopreserved in the serum- and xeno-free defined reagent  
18 CryoStore<sup>®</sup> CS10 (Stem Cell Technology, Canada) in liquid nitrogen (gas phase) in an automated Brooks System  
19 (Brooks Life Science, USA) for long-term storage. The releasing criteria for UC-MSC products are shown in Table  
20 3.

21 To prepare UC-MSCs for therapy, aliquots of P5 UC-MSCs will be thawed in a temperature control water bath  
22 or incubator on the infusion day. The hUC-MSCs will be washed and suspended in 0.9% normal saline. In addition to  
23 inspecting the quality of the UC-MSC product based on the releasing criteria, the staff of the Cell Therapy Department  
24 will confirm the viability and quality of the UC-MSC product before the infusion. The cell dose will be calculated  
25 based on patients' body weight and cell viability results to obtain the dose of  $1 \times 10^6$  viable cells/kg patient body weight  
26 prior to transport to the administration ward. Currently, there is no effective treatment for COPD patients. Thus, the  
27 intervention group will be given the standard COPD medication management as primary treatment and extra UC-  
28 MSC administration, while the control group will receive only the standard COPD treatment (Table 1).

### 29 ***Mode of cell administration (UC-MSC group)***

30 Patients assigned to UC-MSC administration groups will receive two administrations at a dose of 1 million  
31 cells/kg patient bodyweight via the IV route with a 3-month intervening interval. On the day of infusion, thawed cells  
32 at P5 will be prepared to meet the target administration dose based on the number of viable cells in 10 mL of 0.9%  
33 NaCl (Braun, USA) as described above and delivered to the administration ward for infusion at a rate of 20 mL/hour.

### 34 ***Withdrawal***

Participant discontinuation may occur upon participant death, severe adverse events (SEAs), other serious disease-limiting involvement, or a direct request from participant to withdraw from the study. Once the participant withdraws from the study, the reasons for the withdrawal and all recorded results will be documented in detail. New participants will not be recruited to replace withdrawn participants.

### ***Adverse events (AEs)***

AEs are defined as adverse medical events that occur after the patient signs informed consent until completion of the follow-up period. AEs include abnormal laboratory results, symptoms, or diseases. All AEs will be documented on a written case report form (CRF) and transferred to a research electronic data capture (RedCap) system. Once AEs occur, the physician and clinician in charge will follow the necessary treatment according to the patient's condition and decide whether to suspend clinical research. In terms of severe adverse events (SAEs), the clinician team will follow the first priority to treat principle and be considered an emergency situation. The principal investigators will immediately inform the Ethical Committee and Medical Advisory board of Vinmec Times City International Hospital. Within 24 h, the SAE report should be submitted with full description, while a follow-up SAE report should be submitted to the Ethical Committee of Vinmec Times City International Hospital. Within the 7 days, the SAE report with comments from the Ethical Committee will be submitted to the National Ethical Committee of Vietnam Ministry of Health via post. All participants enrolled in the study will be subjected to an insurance policy that provides ancillary and posttrial medical care in case of injury or death as a result of their participation in the trial.

### ***Outcome evaluation***

#### ***Primary outcomes (safety)***

All required evaluation and laboratory tests with the timeframes are listed in Table 1. To assess safety, the number of AEs or SAEs during stem cell administration (72 h) at 3 months, 6 months, and 12 months after discharge will be evaluated. Body temperature, blood pressure, respiratory rate, heart rate, and SpO<sub>2</sub> will be recorded in real-time before and during MSC administration up to 24 h. Additionally, D-dimer level and patients' blood analysis will be performed at administration and 24 hour post-infusion to monitor the potential thrombotic events as previously reported<sup>24</sup>. As mentioned above, the first phase of this study will involve recruiting five pairs of patients to evaluate the safety prior to initiating the second phase. The safety report of the first phase will cover one month postdischarge and will be submitted to the Ethical Committee of Vinmec Times City International Hospital and the National Ethical Committee of Vietnam Ministry of Health for approval of starting the second phase.

SAEs include death, any critical cardiac event (new ventricular tachycardia, ventricular fibrillation, or asystole, cardiac arrest, cardiac hypertrophy), acute pulmonary distress and embolism, stroke, anaphylactic shock, sepsis, and other conditions that extend the hospital stay. The prespecified AEs include fever, common allergic reactions (rash, edema, erythema, pallor), infection at the administration site, changes in vital signs, and abnormal laboratory test results (including hematological analysis and indicators of liver and kidney functions).

#### ***Secondary outcomes (Efficacy)***

1  
2  
3 1 The efficacy endpoints are as follows: (1) number of admissions and readmissions, (2) general self-efficacy,  
4 2 (3) the number of admissions and unscheduled outpatient visits due to symptoms of COPD, (3) arterial blood gas  
5 3 analysis (including pH, PaO<sub>2</sub>, PaCO<sub>2</sub>, BE, HCO<sub>3</sub><sup>-</sup>), (4) respiratory functions (FEV<sub>1</sub>, FEV<sub>1</sub>/FVC, VC, TLC, RV,  
6 4 DLCO, DLNO/DLCO), (5) electrocardiogram, echocardiography, high-resolution chest computed tomography,  
7 5 abdominal ultrasound, abnormality of thyroid and mammary gland, (6) inflammatory response (CRP, Pro-BNP, and  
8 6 Troponin-T) and (7) cytokine analysis from patients' plasma. In addition, the modified medical research council  
9 7 (mMRC) questionnaire and quality of life (Georges Respiratory Questionnaire – SGRQ) will be used to monitor  
10 8 respiratory function improvement. To reveal the therapeutic effects of UC-MSC administration, UC-MSC  
11 9 characterization will be conducted *in vitro*, including MSC marker analysis, metabolic evaluation, immunoregulatory  
12 10 assessment, and cytokine secretion analysis (Table 4).

### 11 ***Follow-up procedure***

12 12 Follow-up visits will be conducted at 3, 6, and 12 months after hUC-MSC administration. Patients will be  
13 13 asked to come to the hospital to undergo an assessment of their conditions according to the protocol procedure. The  
14 14 safety follow-up will include an extra 1-month follow-up point via telephone and outpatient contact, and patients will  
15 15 only be asked to make an appointment if AEs or SAEs occur.

### 16 ***Data collection***

17 17 The data accumulated during the trial will be documented in the patients' medical records and the CRF. The  
18 18 quality control officers from Vinmec Times City International Hospital and Vinmec Scientific Research Board  
19 19 independently checked the accuracy and consistency of the CRF data with the original patients' medical records to  
20 20 ensure that the data were accurately entered into the CRF. Once the CRF is checked, within 7 days, all data will be  
21 21 recorded to RedCap software by assigned personnel and crosschecked by principle investigators. There are four data  
22 22 collection points, including baseline and 3 months, 6 months, and 12 months postadministration. The internal auditor  
23 23 of the Vinmec Research Institute of Stem Cell and Gene Technology will review each original research record to  
24 24 confirm the accuracy, consistency, timely records, and meet the standard requirements. Data analysis will be  
25 25 performed using RedCap and statistical analysis software following the statistical analysis strategy  
26 26 (<https://redcap.vinmec.com/>). The data of this clinical trial will be disseminated with permission from funding bodies  
27 27 and principle investigators through national and international conferences, peer-reviewed publications, and scientific  
28 28 reports. A complete data set will be available upon request after trial completion.

### 29 ***Statistical analysis strategy***

30 30 Descriptive statistics will be used to illustrate the demographics of the COPD patients. Categorical variables  
31 31 are expressed as proportions, whereas quantitative variables are described as the mean values and their standard  
32 32 deviations or as the medians and their interquartile ranges. The number and type of adverse events/serious adverse  
33 33 events will be compared between the two treatment groups using the Chi square (or Fisher's exact) test. For the  
34 34 intervention and control groups, the indicators (m-MRC, CAT, SGRQ, respiratory functions, and arterial blood gas  
35 35 analysis) at baseline and at 3 months, 6 months, and 12 months will be compared with repeated measures ANOVA.

1  
2  
3 1 P-values < 0.05 will be considered statistically significant. The analyses will be performed using Stata version 14  
4 (StataCorp, College Station, TX, USA).  
5

### 6 ***Patient and public involvement***

7  
8  
9 4 The patients and public were not involved in the design, or conduct, or reporting or dissemination plans of  
10 our research.  
11

### 12 **Ethics and Dissemination**

13  
14 7 This trial, including the consent form and clinical protocol, was approved by the Ethical Committee of Vinmec  
15 International Hospital (number: 166/2019/QĐ-VMEC) and Vietnam Ministry of Health (number: 2002/QĐ-BYT).  
16 8 This study was registered at ClinicalTrials.gov (number NCT04433104). The trial conforms with the Declaration of  
17 9 Helsinki. All participants will provide oral and written informed consent prior to participating in the study. This study  
18 10 will be reported in accordance with the STROBE guidelines for matched case-control trial<sup>25</sup>. We will disseminate the  
19 11 research results through high-quality peer-reviewed open access (via PubMed) journals and presentations at national  
20 12 and international conferences. Finally, an ongoing update of the trial will also be provided and shared annually with  
21 13 our partners in the health system and community agencies according to National Regulation.  
22 14  
23  
24  
25

### 26 **Discussion**

27  
28  
29 16 This study protocol presents the matched-control phase I/II clinical trial evaluating the safety and potential  
30 17 efficacy of allogeneic UC-MSC administration in patients with moderate-to-severe COPD (GOLD 2019). To date,  
31 18 there is no effective treatment available for COPD patients, and pharmacological interventions are hampered by the  
32 19 heterogeneity of disease mechanisms and phenotypic alternation. Therefore, establishing new treatment methods to  
33 20 reduce the devastating effects of COPD is imperative. The body of preclinical studies and human clinical trials  
34 21 suggests that MSC administration emerges as a potential therapeutic approach for COPD because MSCs have been  
35 22 found to be well tolerated and safe in many clinical trials and have proven their effectiveness in animal models. Several  
36 23 clinical trials have been conducted in COPD. Most of these studies were phase 1 safety trials, which uniformly reported  
37 24 no obvious adverse events and serious adverse events as well as no evidence of infusional toxicities during the follow-  
38 25 up period<sup>26</sup>. However, the effectiveness of MSC therapy showed differences among various clinical trials, and a small  
39 26 number of trials have revealed no significant changes in lung function and fibrosis postadministration compared with  
40 27 baseline levels<sup>27</sup>. Therefore, it is important to comprehensively analyze the factors that directly contribute to treatment  
41 28 safety and efficacy.  
42  
43  
44  
45  
46  
47

48 29 Human clinical trials were conducted to evaluate the safety and efficacy of MSCs in the treatment of COPD,  
49 30 including five studies using bone marrow-derived cells<sup>14-17 19</sup> and a pilot study using UC-MSCs<sup>18</sup>. The first study  
50 31 supported the safety profile of MSCs administered BMSCs to four COPD patients, although the overall clinical  
51 32 outcomes did not demonstrate the efficacy of the treatment. It is understandable that studies together with the two  
52 33 trials (NCT001110252 and NCT01306513) are phase 1 clinical trials that aimed to evaluate the safety and feasibility  
53 34 of cellular administration in the treatment of COPD. Notably, the NCT001110252 study followed up with patients for  
54  
55  
56  
57  
58  
59  
60

1 up to 3 years illustrated an overall reduction in the process of COPD pathological development<sup>19</sup>. In a pilot study  
2 using UC-MSCs, COPD patients were followed up for 6 months, and no AEs or SAEs were observed throughout the  
3 course of the study. Although clinical outcomes such as COPD exacerbations, mMRC score, and CAT were  
4 significantly reduced postadministration, pulmonary function parameters remained unchanged compared to baseline  
5<sup>18</sup>. In our current study, we use UC-MSCs as an “off-the-shelf” product for administration, providing flexibility in  
6 patient management and standardized products for all treated patients, allowing more accuracy in evaluation.  
7 Moreover, by using a matched control design, our study aims to eliminate the variability in COPD conditions between  
8 the intervention and control groups to accurately evaluate the safety and efficacy of the treatment. In general, it was  
9 confirmed that MSC administration is well tolerated without serious adverse events or administration-associated  
10 adverse events and is not associated with significant alterations in spirometry, immune function, cardiovascular  
11 activity, or patient quality of life<sup>28</sup>.

12 In both preclinical models of COPD and clinical trials, MSCs regardless of their sources exhibit their  
13 therapeutic potential via either anti-inflammatory paracrine actions, reducing the rate of pulmonary fibrosis and/or  
14 lung recovery. In rodent models, studies using bone marrow-derived MSCs (BM-MSCs) or adipose-derived MSCs  
15 (AD-MSCs) have demonstrated that these cells administered via intravenous injection or intra-tracheal instillation  
16 were safe and effective in attenuating airway injury and enhance the recovery of lung functions via reducing airway  
17 inflammation and apoptosis<sup>29</sup>. In mice model, administration of UC-MSCs (from Wharton’s Jelly) significantly  
18 improved the pulmonary function and regeneration in COPD-induced mice compared to the sham group<sup>30</sup>. To date,  
19 no comparative study is conducted to address the differences in efficacy introduced by MSCs from different sources.  
20 In our previous study, we demonstrated that MSCs from perinatal and adult sources behaved differently even when  
21 they were cultured under a standardized culture platform (xeno-free and serum-free)<sup>31</sup>. Therefore, although it seems  
22 that MSCs derived from different sources might show similar effects on COPD-induced animal models, we believe  
23 that the source of MSCs might play a role in the level of the therapy effectiveness and their mechanism of action might  
24 also differ, especially when they are exposed to COPD-related microenvironment.

25 To provide an insight into the mechanism of action of MSC administration in response to COPD conditions,  
26 this study aims to evaluate the response of patients’ lymphocytes to UC-MSC *in vitro* by co-cultures COPD patient’s  
27 lymphocytes (before and after UC-MSCs administration at different timepoints) with UC-MSCs to evaluate the  
28 potential effect of UC-MSCs on patient’s lymphocytes compared to that of healthy donors. Hence, this experiment is  
29 not only evaluating the UC-MSC potency but also reveal the potential mechanism of MSC actions in COPD patients.  
30 We expect the UC-MSCs would inhibit the proliferation of COPD patient’s lymphocytes in a similar manner to that  
31 of healthy donor. The culture media of UC-MSC alone, lymphocyte alone, and co-culture of UC-MSCs and  
32 lymphocyte will be subjected to cytokines analysis of inflammatory factors such as IL-1 $\beta$ , TNF- $\alpha$ , IL-4, IL-8, IL-10,  
33 etc. to identify the release of soluble mediators from UC-MSCs that might involve in reducing lung inflammation.  
34 Toward this aim, we speculate the potential mechanism of MSC actions for COPD includes: (1) Reduction of  
35 inflammatory reactions at injured airway via either paracrine effects or cell-to-cell contact with immune cells, (2)



1  
2  
3 1 reduction of pulmonary fibrosis and airway thickening process, and (3) improvement of parenchymal repair by  
4 2 secretion of wide range of cytokines and growth factors.

5  
6  
7 3 The major delivery routes of MSCs in the treatment of pulmonary disease include intraperitoneal (usually in  
8 4 animal models), intranasal or intratracheal, and IV administration. The intratracheal administration of MSCs was  
9 5 performed in children with bronchopulmonary dysplasia in several small uncontrolled studies. However, in terms of  
10 6 COPD, all trials utilized IV administration with the aim of investigating whether systemic administration of MSCs is  
11 7 safe and effective in COPD patients. In fact, the IV administration route is considered a better option compared to  
12 8 intratracheal delivery for several reasons. Previous studies illustrated that IV administration of MSCs was safe and  
13 9 potentially provided therapeutic effects in several lung diseases, including COPD<sup>15,27</sup>. Moreover, a systemic analysis  
14 10 of preclinical studies suggested that IV administration of MSCs introduced better effects than those administered via  
15 11 the intratracheal route<sup>13</sup>. We hypothesized that the results of this clinical trial will provide data supporting that UC-  
16 12 MSC administration via the IV route is safe, feasible, and potentially effective in COPD patients.

17  
18  
19 13 The dose-escalating evaluation has been conducted in several clinical trials for various diseases, including  
20 14 pulmonary syndromes, using a wide range of UC-MSCs doses from 0.5 – 10 million cells/kg via IV administration<sup>15</sup>  
21 15<sup>27,32</sup>. Notably, limited studies have reported the different effects of MSC doses in COPD patients. In fact, a relatively  
22 16 high dose (10 million cells/kg patient body weight) was tested in ARDS patients without any administration-associated  
23 17 AEs or SAEs recorded. However, it is important to note that delivery of a high dose of stem cells might increase the  
24 18 risk of pulmonary embolism and thrombosis regardless of administration route, which was demonstrated previously  
25 19 in animal models and clinical trials<sup>33-35</sup>. Therefore, in this trial, we used the most common dose of MSCs used in  
26 20 numerous studies, which is 1 million cells/kg patient body weight.

27  
28  
29 21 In pre-clinical models of elastase-induced emphysema, two doses of MSCs improved anti-inflammatory  
30 22 regulation and lung recover compared to a single dose of MSCs<sup>36</sup>. In clinical trial using BM-MSCs, COPD patients  
31 23 received four infusions showed a reduction in circulating C-reactive protein and in combination with lung volume  
32 24 reduction strategy, two infusions were enough to increase the expression of CD31, an indication of microvascular  
33 25 endothelial cell response<sup>17,26</sup>. Moreover, the effects of autologous MSC administration were reported to be relatively  
34 26 narrow because it was reported the positive effects in patients with type 2 diabetes were observed as early as 1 month  
35 27 post-administration of MSCs and started to diminish after three to six months post-administration<sup>37,38</sup>. Hence, in this  
36 28 current study, we will perform two doses of UC-MSCs with a 3-month intervening interval.

37  
38  
39 29 This clinical trial has several advantages. First, this is the first trial using an “off-the-shelf” product (UC-MSCs)  
40 30 for COPD patients. Second, this is the first trial to investigate the therapeutic effects of UC-MSCs as supplementary  
41 31 products in combination with standard medication treatments according to the GOLD 2019 recommendation. Third,  
42 32 if the potential efficacy can be detected throughout the course of our study, our results (including MSC biological  
43 33 analysis of stem cell characterization, immunoregulation, and metabolism) will strengthen our knowledge and  
44 34 understanding of UC-MSCs effects in COPD and provide a fundamental background for treating patients with  
45 35 moderate-to-severe COPD. In the case of no therapeutic effect, our data will also provide important insight into the  
46 36 safety of the treatment and potential alternative approach for MSC therapy of COPD.

## 1 Acknowledgements

2 The authors would like to thank all patients involved in the study for their trust, understanding, and  
3 willingness. We thank our collaborating clinicians at the Vinmec Health Care System for participating in this study.  
4 We also thank our colleagues at Vinmec High-tech center and Vinmec Tissue Bank for their support with the quality  
5 control and UC-MSc experiment set up.

## 6 Contributors:

7 TLN, DMH, and KTN were involved in the design of the study. DMH drafted the manuscripts with critical input from  
8 LNT, KTN, AHN, and BNN. LNT, AHN, and BNN contributed to the standard medical treatment checklist and drug  
9 for all patients. DMH, LNT and AHN are the grant holder and project leader, respectively. All authors reviewed,  
10 edited and approved the final version of the manuscript.

## 11 Funding

12 This work was supported by the Vingroup Scientific Research and Clinical Application Fund (Grant number:  
13 ISC.19.16). The funder has no role in the analysis or preparation of this manuscript.

## 14 Conflicts of Interests

15 None declared.

## 16 Patient consent for publication

17 Not required

## 18 References

- 19 1. Rabe KF, Watz H. Chronic obstructive pulmonary disease. *Lancet* 2017;389(10082):1931-40. doi: 10.1016/S0140-  
20 6736(17)31222-9 [published Online First: 2017/05/18]
- 21 2. Collaborators GBDCRD. Global, regional, and national deaths, prevalence, disability-adjusted life years, and years  
22 lived with disability for chronic obstructive pulmonary disease and asthma, 1990-2015: a systematic analysis  
23 for the Global Burden of Disease Study 2015. *Lancet Respir Med* 2017;5(9):691-706. doi: 10.1016/S2213-  
24 2600(17)30293-X
- 25 3. Ho T, Cusack RP, Chaudhary N, et al. Under- and over-diagnosis of COPD: a global perspective. *Breathe (Sheff)*  
26 2019;15(1):24-35. doi: 10.1183/20734735.0346-2018 [published Online First: 2019/03/07]
- 27 4. Nguyen TS, Nguyen TLH, Pham TTV, et al. Impact of pharmaceutical care in the improvement of medication  
28 adherence and quality of life for COPD patients in Vietnam. *Respir Med* 2019;153:31-37. doi:  
29 10.1016/j.rmed.2019.05.006
- 30 5. Ngo CQ, Phan DM, Vu GV, et al. Inhaler Technique and Adherence to Inhaled Medications among Patients with  
31 Acute Exacerbation of Chronic Obstructive Pulmonary Disease in Vietnam. *Int J Environ Res Public Health*  
32 2019;16(2) doi: 10.3390/ijerph16020185

- 1 6. Caplan AI. Mesenchymal Stem Cells: Time to Change the Name! *Stem Cells Transl Med* 2017;6(6):1445-51. doi:  
2 10.1002/sctm.17-0051
- 3 7. Viswanathan S, Shi Y, Galipeau J, et al. Mesenchymal stem versus stromal cells: International Society for Cell &  
4 Gene Therapy (ISCT(R)) Mesenchymal Stromal Cell committee position statement on nomenclature.  
5 *Cytotherapy* 2019;21(10):1019-24. doi: 10.1016/j.jcyt.2019.08.002
- 6 8. Dominici M, Le Blanc K, Mueller I, et al. Minimal criteria for defining multipotent mesenchymal stromal cells.  
7 The International Society for Cellular Therapy position statement. *Cytotherapy* 2006;8(4):315-7. doi:  
8 10.1080/14653240600855905
- 9 9. Amable PR, Teixeira MV, Carias RB, et al. Protein synthesis and secretion in human mesenchymal cells derived  
10 from bone marrow, adipose tissue and Wharton's jelly. *Stem Cell Res Ther* 2014;5(2):53. doi: 10.1186/scrt442
- 11 10. Qin H, Zhao A. Mesenchymal stem cell therapy for acute respiratory distress syndrome: from basic to clinics.  
12 *Protein Cell* 2020;11(10):707-22. doi: 10.1007/s13238-020-00738-2
- 13 11. Cruz FF, Rocco PRM. The potential of mesenchymal stem cell therapy for chronic lung disease. *Expert Rev Respir*  
14 *Med* 2020;14(1):31-39. doi: 10.1080/17476348.2020.1679628
- 15 12. Mohammadipoor A, Antebi B, Batchinsky AI, et al. Therapeutic potential of products derived from mesenchymal  
16 stem/stromal cells in pulmonary disease. *Respir Res* 2018;19(1):218. doi: 10.1186/s12931-018-0921-x
- 17 13. Eggenhofer E, Benseler V, Kroemer A, et al. Mesenchymal stem cells are short-lived and do not migrate beyond  
18 the lungs after intravenous infusion. *Front Immunol* 2012;3:297. doi: 10.3389/fimmu.2012.00297
- 19 14. Ribeiro-Paes JT, Bilaqui A, Greco OT, et al. Unicentric study of cell therapy in chronic obstructive pulmonary  
20 disease/pulmonary emphysema. *Int J Chron Obstruct Pulmon Dis* 2011;6:63-71. doi:  
21 10.2147/COPD.S15292
- 22 15. Weiss DJ, Casaburi R, Flannery R, et al. A placebo-controlled, randomized trial of mesenchymal stem cells in  
23 COPD. *Chest* 2013;143(6):1590-98. doi: 10.1378/chest.12-2094
- 24 16. de Oliveira HG, Cruz FF, Antunes MA, et al. Combined Bone Marrow-Derived Mesenchymal Stromal Cell  
25 Therapy and One-Way Endobronchial Valve Placement in Patients with Pulmonary Emphysema: A Phase I  
26 Clinical Trial. *Stem Cells Transl Med* 2017;6(3):962-69. doi: 10.1002/sctm.16-0315
- 27 17. Stolk J, Broekman W, Mauad T, et al. A phase I study for intravenous autologous mesenchymal stromal cell  
28 administration to patients with severe emphysema. *QJM* 2016;109(5):331-6. doi: 10.1093/qjmed/hcw001
- 29 18. Le Thi Bich P, Nguyen Thi H, Dang Ngo Chau H, et al. Allogeneic umbilical cord-derived mesenchymal stem  
30 cell transplantation for treating chronic obstructive pulmonary disease: a pilot clinical study. *Stem Cell Res*  
31 *Ther* 2020;11(1):60. doi: 10.1186/s13287-020-1583-4
- 32 19. Stessuk T, Ruiz MA, Greco OT, et al. Phase I clinical trial of cell therapy in patients with advanced chronic  
33 obstructive pulmonary disease: follow-up of up to 3 years. *Rev Bras Hematol Hemoter* 2013;35(5):352-7.  
34 doi: 10.5581/1516-8484.20130113
- 35 20. Singh D, Agusti A, Anzueto A, et al. Global Strategy for the Diagnosis, Management, and Prevention of Chronic  
36 Obstructive Lung Disease: the GOLD science committee report 2019. *Eur Respir J* 2019;53(5) doi:  
37 10.1183/13993003.00164-2019



- 1  
2  
3 1 21. Kim S, Oh J, Kim YI, et al. Differences in classification of COPD group using COPD assessment test (CAT) or  
4 2 modified Medical Research Council (mMRC) dyspnea scores: a cross-sectional analyses. *BMC Pulm Med*  
5 3 2013;13:35. doi: 10.1186/1471-2466-13-35 [published Online First: 2013/06/05]  
6 4  
7 22. Hsieh FY. Sample size formulae for intervention studies with the cluster as unit of randomization. *Stat Med*  
8 5 1988;7(11):1195-201. doi: 10.1002/sim.4780071113 [published Online First: 1988/11/01]  
9 6  
10 23. Hoang VT, Trinh QM, Phuong DTM, et al. Standardized xeno- and serum-free culture platform enables large-  
11 7 scale expansion of high-quality mesenchymal stem/stromal cells from perinatal and adult tissue sources.  
12 8 *Cytotherapy* 2020 doi: 10.1016/j.jcyt.2020.09.004 [published Online First: 2020/10/25]  
13 9  
14 24. George MJ, Prabhakara K, Toledano-Furman NE, et al. Procoagulant in vitro effects of clinical cellular  
15 10 therapeutics in a severely injured trauma population. *Stem Cells Transl Med* 2020;9(4):491-98. doi:  
16 11 10.1002/sctm.19-0206 [published Online First: 2020/01/07]  
17 12  
18 25. Cuschieri S. The STROBE guidelines. *Saudi J Anaesth* 2019;13(Suppl 1):S31-S34. doi: 10.4103/sja.SJA\_543\_18  
19 13 [published Online First: 2019/04/02]  
20 14  
21 26. Weiss DJ. Cell-based Therapy for Chronic Obstructive Pulmonary Disease. Rebuilding the Lung. *Ann Am Thorac*  
22 15 *Soc* 2018;15(Suppl 4):S253-S59. doi: 10.1513/AnnalsATS.201808-534MG [published Online First:  
23 16 2019/02/14]  
24 17  
25 27. Wilson JG, Liu KD, Zhuo H, et al. Mesenchymal stem (stromal) cells for treatment of ARDS: a phase 1 clinical  
26 18 trial. *Lancet Respir Med* 2015;3(1):24-32. doi: 10.1016/S2213-2600(14)70291-7  
27 19  
28 28. Zhao R, Su Z, Wu J, et al. Serious adverse events of cell therapy for respiratory diseases: a systematic review and  
29 20 meta-analysis. *Oncotarget* 2017;8(18):30511-23. doi: 10.18632/oncotarget.15426  
30 21  
31 29. Liu X, Fang Q, Kim H. Preclinical Studies of Mesenchymal Stem Cell (MSC) Administration in Chronic  
32 22 Obstructive Pulmonary Disease (COPD): A Systematic Review and Meta-Analysis. *PLoS One*  
33 23 2016;11(6):e0157099. doi: 10.1371/journal.pone.0157099 [published Online First: 2016/06/10]  
34 24  
35 30. Cho JW, Park KS, Bae JY. Effects of Wharton's jelly-derived mesenchymal stem cells on chronic obstructive  
36 25 pulmonary disease. *Regen Ther* 2019;11:207-11. doi: 10.1016/j.reth.2019.07.009 [published Online First:  
37 26 2019/09/07]  
38 27  
39 31. Hoang VT, Trinh QM, Phuong DTM, et al. Standardized xeno- and serum-free culture platform enables large-  
40 28 scale expansion of high-quality mesenchymal stem/stromal cells from perinatal and adult tissue sources.  
41 29 *Cytotherapy* 2021;23(1):88-99. doi: 10.1016/j.jcyt.2020.09.004 [published Online First: 2020/10/25]  
42 30  
43 32. He X, Ai S, Guo W, et al. Umbilical cord-derived mesenchymal stem (stromal) cells for treatment of severe sepsis:  
44 31 aphase 1 clinical trial. *Transl Res* 2018;199:52-61. doi: 10.1016/j.trsl.2018.04.006  
45 32  
46 33. Tanaka E, Ogawa Y, Mukai T, et al. Dose-Dependent Effect of Intravenous Administration of Human Umbilical  
47 33 Cord-Derived Mesenchymal Stem Cells in Neonatal Stroke Mice. *Front Neurol* 2018;9:133. doi:  
48 34 10.3389/fneur.2018.00133  
49 35  
50 34. Kansu E. Thrombosis in stem cell transplantation. *Hematology* 2012;17 Suppl 1:S159-62. doi:  
51 36 10.1179/102453312X13336169156735  
52  
53  
54  
55  
56  
57  
58  
59  
60

- 1  
2  
3 1 35. Jung JW, Kwon M, Choi JC, et al. Familial occurrence of pulmonary embolism after intravenous, adipose tissue-  
4 2 derived stem cell therapy. *Yonsei Med J* 2013;54(5):1293-6. doi: 10.3349/ymj.2013.54.5.1293  
5  
6 3 36. Poggio HA, Antunes MA, Rocha NN, et al. Impact of one versus two doses of mesenchymal stromal cells on lung  
7 4 and cardiovascular repair in experimental emphysema. *Stem Cell Res Ther* 2018;9(1):296. doi:  
8 5 10.1186/s13287-018-1043-6 [published Online First: 2018/11/10]  
9  
10 6 37. Hu J, Li C, Wang L, et al. Long term effects of the implantation of autologous bone marrow mononuclear cells  
11 7 for type 2 diabetes mellitus. *Endocr J* 2012;59(11):1031-9. doi: 10.1507/endocrj.ej12-0092 [published  
12 8 Online First: 2012/07/21]  
13  
14 9 38. Liu X, Zheng P, Wang X, et al. A preliminary evaluation of efficacy and safety of Wharton's jelly mesenchymal  
15 10 stem cell transplantation in patients with type 2 diabetes mellitus. *Stem Cell Res Ther* 2014;5(2):57. doi:  
16 11 10.1186/scrt446 [published Online First: 2014/04/25]  
17  
18  
19  
20  
21  
22  
23  
24  
25  
26  
27  
28  
29  
30  
31  
32  
33  
34  
35  
36  
37  
38  
39  
40  
41  
42  
43  
44  
45  
46  
47  
48  
49  
50  
51  
52  
53  
54  
55  
56  
57  
58  
59  
60

1  
2  
3 **1 Figure Legend:**  
4

5 **2 Figure 1: Schematic of the study.** COPD patients will be screened to enroll in the study. Patients from the control  
6 group will be assigned to a patient from the UC-MSG group once they meet all matched criteria based on age ( $\pm 5$   
7 years), gender, and COPD severity classification (GOLD 2019).  
8  
9

10 **5 Figure 2: Standard COPD medication treatment for both groups according to GOLD 2019 and Vietnam**  
11 **Ministry of Health Guideline.** Matched COPD patients will be treated using the same treatment based on their GOLD  
12 2019 classification (Groups A, B, C, and D). Group A (not included in this study): a single bronchodilator will be used  
13 and based on the clinical assessments and persistence of the symptoms to continue/stop or replace by another  
14 bronchodilator. Group B: Single LAMA or LABA will be initially used. If the symptoms are not reduced, a  
15 combination of both LAMA and LABA will be applied. Group C: A single LAMA drug will be used for initial  
16 treatment. If exacerbations occur, LAMA and LABA combination will be applied as priority. The LAMA + ICS will  
17 be applied in specific cases based on clinical assessment, as the ICS has been reported to have severe side effects on  
18 lung inflammation. Group D: Should start the treatment with LAMA. If the patient has CAT $>20$ , LABA and LAMA  
19 will be used as initial treatment. LABA + ICS will be used as the initial treatment only when the patient has asthma  
20 COPD overlap or the patient's eosinophil level  $> 300$ . If exacerbation occurs after the initial treatment, the combination  
21 of LAMA, LABA, and ICS should be applied. Additional roflumilast should be used if FEV1  $< 50\%$  and the patient  
22 has chronic bronchitis. Macrolide should be used if the patient is a former smoker. The red arrow indicates priority  
23 treatment.  
24  
25  
26  
27  
28  
29  
30  
31  
32  
33  
34  
35  
36  
37  
38  
39  
40  
41  
42  
43  
44  
45  
46  
47  
48  
49  
50  
51  
52  
53  
54  
55  
56  
57  
58  
59  
60

**Table 1: Standard medication treatment for both groups based on GOLD 2019 guidelines and Vietnam Ministry of Health recommendations.**

| Items                                                                          | COPD GOLD 2019 Group B                                                                    | COPD GOLD 2019 Group C       | COPD GOLD 2019 Group D                                                                                                                        |
|--------------------------------------------------------------------------------|-------------------------------------------------------------------------------------------|------------------------------|-----------------------------------------------------------------------------------------------------------------------------------------------|
| <b>Initial treatment</b>                                                       | A long acting bronchodilator (LABA or LAMA)                                               | LAMA                         | LAMA                                                                                                                                          |
| <b>Difficulty in breathing (moderate)</b>                                      | LAMA + LABA                                                                               | LAMA + LABA<br>Or LAMA + ICS | LAMA + LABA<br>ISC/LABA use when: <ul style="list-style-type: none"> <li>▪ Asthma COPD overlap.</li> <li>▪ Eosinophils &gt;300/ul.</li> </ul> |
| <b>Difficulty in breathing (Severe)</b>                                        | LAMA + LABA                                                                               | LAMA + LABA<br>Or LAMA + ICS | LAMA + LABA + ICS                                                                                                                             |
| <b>Name of Drugs use in Standard COPD Medication Treatment for both groups</b> |                                                                                           |                              |                                                                                                                                               |
| <b>SABA</b>                                                                    | Salbutamol, Terbutaline, Fenoterol                                                        |                              |                                                                                                                                               |
| <b>LABA</b>                                                                    | Indacaterol, Bambuterol                                                                   |                              |                                                                                                                                               |
| <b>SAMA</b>                                                                    | Ipratropium                                                                               |                              |                                                                                                                                               |
| <b>LAMA</b>                                                                    | Tiotropium                                                                                |                              |                                                                                                                                               |
| <b>SABA + SAMA</b>                                                             | Ipratropium and salbutamol<br>Ipratropium and fenoterol                                   |                              |                                                                                                                                               |
| <b>LABA + LAMA</b>                                                             | Indacaterol and Glycopyronium<br>Olodaterol and Tiotropium<br>Vilanterol and Umeclidinium |                              |                                                                                                                                               |
| <b>ICS + LABA</b>                                                              | Budesonid and Formoterol<br>Fluticason and Vilanterol<br>Fluticason and Salmeterol        |                              |                                                                                                                                               |
| <b>Antibiotics</b>                                                             | Erythromycin<br>Rofumilast <sup>1</sup>                                                   |                              |                                                                                                                                               |
| <b>Long/short-acting Xanthine</b>                                              | Theophyllin/Theostat                                                                      |                              |                                                                                                                                               |

<sup>1</sup>: Roflumilast was used only when patients' FEV1 < 50% and had at least 1 admission within 1 year

**Table 2: Study timeline and clinical procedures during the trial.** \* If the results of the screening phase for UC-  
MSC groups are within 30 days of UC-MSC administration, they will be automatically considered as the baseline  
level.

| Study Procedure                                                  | Prescreening                        | Screening phase*                    | Baseline                            | 3 months                            | 6 months                            | 12 months                           |
|------------------------------------------------------------------|-------------------------------------|-------------------------------------|-------------------------------------|-------------------------------------|-------------------------------------|-------------------------------------|
| UC-MSC administration <sup>1</sup>                               |                                     |                                     | <input checked="" type="checkbox"/> | <input checked="" type="checkbox"/> |                                     |                                     |
| Medication treatment <sup>2</sup>                                |                                     |                                     | <input checked="" type="checkbox"/> | <input checked="" type="checkbox"/> | <input checked="" type="checkbox"/> | <input checked="" type="checkbox"/> |
| Informed consent                                                 |                                     | <input checked="" type="checkbox"/> |                                     |                                     |                                     |                                     |
| Inclusion and exclusion criteria                                 |                                     | <input checked="" type="checkbox"/> |                                     |                                     |                                     |                                     |
| Demographic information                                          |                                     | <input checked="" type="checkbox"/> | <input checked="" type="checkbox"/> |                                     |                                     |                                     |
| Patients' medical reports                                        |                                     | <input checked="" type="checkbox"/> |
| Vital signs <sup>3</sup> /physical examination                   |                                     | <input checked="" type="checkbox"/> |
| COPD assessment                                                  | <input checked="" type="checkbox"/> | <input checked="" type="checkbox"/> |                                     |                                     |                                     |                                     |
| COPD GOLD 2019 classification                                    | <input checked="" type="checkbox"/> | <input checked="" type="checkbox"/> |                                     | <input checked="" type="checkbox"/> | <input checked="" type="checkbox"/> | <input checked="" type="checkbox"/> |
| Hematology analysis <sup>4</sup>                                 | <input checked="" type="checkbox"/> |
| Infectious disease examination/test <sup>5</sup>                 | <input checked="" type="checkbox"/> | <input checked="" type="checkbox"/> | <input checked="" type="checkbox"/> |                                     |                                     |                                     |
| Blood oxygen saturation/arterial blood gas analysis <sup>6</sup> | <input checked="" type="checkbox"/> |
| Chest CT scan                                                    |                                     | <input checked="" type="checkbox"/> | <input checked="" type="checkbox"/> |                                     | <input checked="" type="checkbox"/> | <input checked="" type="checkbox"/> |
| Chest X-ray                                                      |                                     | <input checked="" type="checkbox"/> | <input checked="" type="checkbox"/> |                                     | <input checked="" type="checkbox"/> | <input checked="" type="checkbox"/> |
| Pulmonary function analysis                                      |                                     | <input checked="" type="checkbox"/> |
| Adverse event evaluation                                         |                                     |                                     | <input checked="" type="checkbox"/> | <input checked="" type="checkbox"/> | <input checked="" type="checkbox"/> | <input checked="" type="checkbox"/> |
| Mortality/complications monitoring                               |                                     |                                     | <input checked="" type="checkbox"/> | <input checked="" type="checkbox"/> | <input checked="" type="checkbox"/> | <input checked="" type="checkbox"/> |

<sup>1</sup>: Applies only for the UC-MSC group at baseline and 3 months.

<sup>2</sup>: Treatment medication applies for all testing groups based on patients' COPD classification according to GOLD 2019 guidelines.

1  
2  
3: Vital signs include body temperature, blood pressure, heart rate, respiratory rate, oxygen saturation, and patient  
4 body weight.

5  
6: Hematological analysis included white blood cell count, platelet count, red blood cell count, hemoglobin, percentage  
7 of lymphocytes, neutrophils, monocytes, eosinophils, basophils, C-reactive protein, Pro-BNP, and Troponin-T, and  
8 D-dimer.

9  
5: Infectious diseases include hepatitis, syphilis, HIV, HBV, and tuberculosis.

10  
6: Blood gas analysis includes pH, PaO<sub>2</sub>, PaCO<sub>2</sub>, BE, HCO<sub>3</sub><sup>-</sup>.

11  
12  
13  
14  
15  
16  
17  
18  
19  
20  
21  
22  
23  
24  
25  
26  
27  
28  
29  
30  
31  
32  
33  
34  
35  
36  
37  
38  
39  
40  
41  
42  
43  
44  
45  
46  
47  
48  
49  
50  
51  
52  
53  
54  
55  
56  
57  
58  
59  
60

For peer review only

**Table 3: Release criteria and stem cell quality control.** To assess the quality of UC-MSCs for administration, a set of release criteria was defined, which included the following: the positive markers (CD73, CD90, and CD105) must be higher than 95%, the negative markers (CD11b, CD19, CD34, CD45, and HLA-DR) must be less than 2%; the cell viability must be higher than 80% with a normal karyotype; and the cell product must be free from microorganism infections and mycoplasma. Immunoregulatory assays will be performed to assess but not consider released criteria.

| Criteria                                    | Testing Method                                                | Released criteria |
|---------------------------------------------|---------------------------------------------------------------|-------------------|
| <b>Positive markers (%) (median, range)</b> |                                                               |                   |
| <i>CD73</i>                                 |                                                               | > 95%             |
| <i>CD90</i>                                 | Flow cytometry using the Human MSC                            | > 95%             |
| <i>CD105</i>                                | Analysis Kit (Becton Dickinson, USA)                          | > 95%             |
| <b>Negative markers (%)</b>                 |                                                               | < 2%              |
| <b>Cell viability (%) (mean ± SD)</b>       | Trypan Blue staining                                          | > 80%             |
| <b>Microorganism tests</b>                  | BacT/Alert® 3D microbial detection System (Biomerieux, USA)   | Negative          |
| <b>Mycoplasma</b>                           | MycoAlert™ Plus Mycoplasma Detection Kit (Lonza, Switzerland) | Negative          |
| <b>Endotoxin</b>                            | Endosafe-PTS (Charles River Laboratories)                     | ≤ 5 EU/kg         |
| <b>Immunoregulatory assay</b>               | Flow Cytometry                                                | Not Applicable    |

**Table 4: Proposed experiments design for evaluation the potential therapeutic mechanism of UC-MSCs in the treatment of COPD**

| Proposed Experiments                         | Criteria                                                                    | Cell Type/Method                                                                                                         | Expected Outcomes                                                                                                                   |
|----------------------------------------------|-----------------------------------------------------------------------------|--------------------------------------------------------------------------------------------------------------------------|-------------------------------------------------------------------------------------------------------------------------------------|
| <b>UC-MSC characterization</b>               | MSC marker analysis                                                         | UC-MSCs/Flow cytometry                                                                                                   | Meet ISCT guideline                                                                                                                 |
|                                              | Differentiation potential                                                   | UC-MSCs/ <i>In vitro</i> differentiation using commercial kits.                                                          | Adipogenic, Chondrogenic, and Osteogenic differentiation                                                                            |
|                                              | Karyotype                                                                   | UC-MSCs/ G-banding method                                                                                                | Normal post-expansion                                                                                                               |
|                                              | Growth factor, cytokines secretion                                          | UC-MSCs/ProcartaPlex Immunoassays                                                                                        | Detection of cytokines and growth factors involves in anti-inflammatory and tissue regeneration process.                            |
| <b>Metabolic evaluation</b>                  | Mitochondrial activities                                                    | UC-MSCs/Agilent Seahorse XF cell mito stress test                                                                        | Measurement of mitochondrial activities of UC-MSCs pre-administration                                                               |
|                                              | Glycolysis                                                                  | UC-MSCs/Agilent Seahorse XF Glycolysis Stress Test                                                                       | Measurement of glycolysis process of UC-MSC pre-administration                                                                      |
| <b>Immunoregulatory Assessment</b>           | Lymphocyte Proliferation Assay                                              | UC-MSCs + peripheral mononuclear cells from healthy donors                                                               | UC-MSCs inhibit the proliferation rate of lymphocytes in the present of PHA.                                                        |
|                                              |                                                                             | UC-MSCs + peripheral mononuclear cells from COPD patients                                                                | UC-MSCs inhibit the proliferation rate of lymphocytes in the present of PHA in a similar manner to healthy donor counterpart        |
| <b>Growth factors and cytokines analysis</b> | UC-MSC secretion profiles under xeno-free and serum-free culture conditions | UC-MSCs/ProcartaPlex Immunoassays                                                                                        | Detection of cytokines and growth factors involves in anti-inflammatory and tissue regeneration process.                            |
|                                              | Cytokine profiles from COPD patients' plasma                                | COPD patients' plasma/ ProcartaPlex Immunoassays                                                                         | Evaluation of cytokines involves in inflammatory response obtain from COPD patients' plasma before and after UC-MSC administration. |
|                                              | Interaction between UC-MSCs and COPD patients' lymphocytes                  | Media obtained from co-culture of UC-MSCs and peripheral mononuclear cells from COPD patients/ ProcartaPlex Immunoassays | Detection of cytokines involves in the anti-inflammatory functions of UC-MSCs.                                                      |



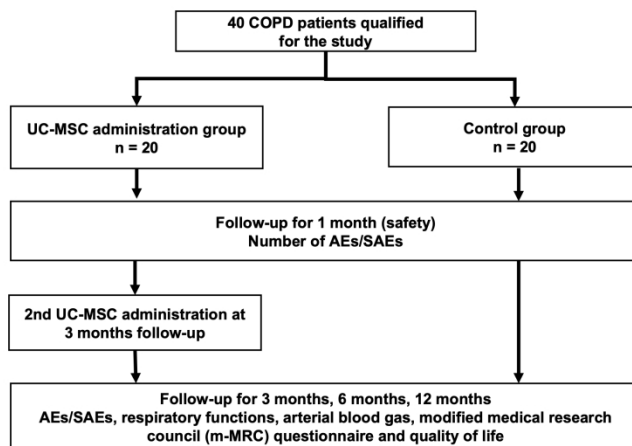

Figure 1

Figure 1: Schematic of the study. COPD patients will be screened to enroll in the study. Patients from the control group will be assigned to a patient from the UC-MSC group once they meet all matched criteria based on age ( $\pm 5$  years), gender, and COPD severity classification (GOLD 2019).

190x275mm (300 x 300 DPI)

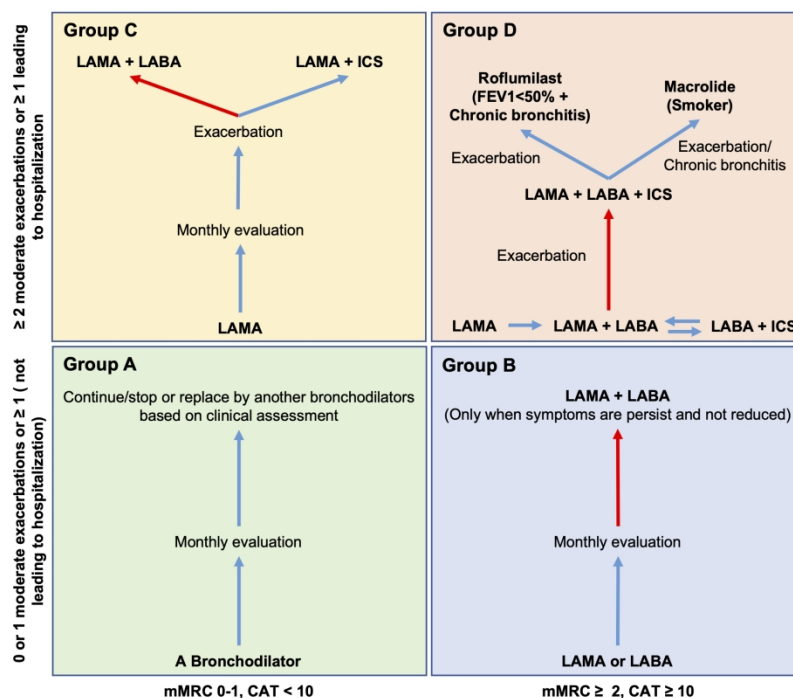

Figure 2:

Figure 2: Standard COPD medication treatment for both groups according to GOLD 2019 and Vietnam Ministry of Health Guideline. Matched COPD patients will be treated using the same treatment based on their GOLD 2019 classification (Groups A, B, C, and D). Group A (not included in this study): a single bronchodilator will be used and based on the clinical assessments and persistence of the symptoms to continue/stop or replace by another bronchodilator. Group B: Single LAMA or LABA will be initially used. If the symptoms are not reduced, a combination of both LAMA and LABA will be applied. Group C: A single LAMA drug will be used for initial treatment. If exacerbations occur, LAMA and LABA combination will be applied as priority. The LAMA + ICS will be applied in specific cases based on clinical assessment, as the ICS has been reported to have severe side effects on lung inflammation. Group D: Should start the treatment with LAMA. If the patient has CAT>20, LABA and LAMA will be used as initial treatment. LABA + ICS will be used as the initial treatment only when the patient has asthma COPD overlap or the patient's eosinophil level > 300. If exacerbation occurs after the initial treatment, the combination of LAMA, LABA, and ICS should be applied. Additional roflumilast should be used if FEV1 < 50% and the patient has chronic bronchitis. Macrolide should be used if the patient is a former smoker. The red arrow indicates priority

1  
2  
3  
4  
5  
6  
7  
8  
9  
10  
11  
12  
13  
14  
15  
16  
17  
18  
19  
20  
21  
22  
23  
24  
25  
26  
27  
28  
29  
30  
31  
32  
33  
34  
35  
36  
37  
38  
39  
40  
41  
42  
43  
44  
45  
46  
47  
48  
49  
50  
51  
52  
53  
54  
55  
56  
57  
58  
59  
60

treatment.

190x275mm (300 x 300 DPI)

# Reporting checklist for protocol of a clinical trial.

Based on the SPIRIT guidelines.

## Instructions to authors

Complete this checklist by entering the page numbers from your manuscript where readers will find each of the items listed below.

Your article may not currently address all the items on the checklist. Please modify your text to include the missing information. If you are certain that an item does not apply, please write "n/a" and provide a short explanation.

Upload your completed checklist as an extra file when you submit to a journal.

In your methods section, say that you used the SPIRIT reporting guidelines, and cite them as:

Chan A-W, Tetzlaff JM, Gøtzsche PC, Altman DG, Mann H, Berlin J, Dickersin K, Hróbjartsson A, Schulz KF, Parulekar WR, Krleža-Jerić K, Laupacis A, Moher D. SPIRIT 2013 Explanation and Elaboration: Guidance for protocols of clinical trials. *BMJ*. 2013;346:e7586

|                                             |                     | Reporting Item                                                                                               | Page Number |
|---------------------------------------------|---------------------|--------------------------------------------------------------------------------------------------------------|-------------|
| <b>Administrative information</b>           |                     |                                                                                                              |             |
| Title                                       | <a href="#">#1</a>  | Descriptive title identifying the study design, population, interventions, and, if applicable, trial acronym | 1           |
| Trial registration                          | <a href="#">#2a</a> | Trial identifier and registry name. If not yet registered, name of intended registry                         | 2           |
| Trial registration: data set                | <a href="#">#2b</a> | All items from the World Health Organization Trial Registration Data Set                                     | "n/a"       |
| Protocol version                            | <a href="#">#3</a>  | Date and version identifier                                                                                  | 2           |
| Funding                                     | <a href="#">#4</a>  | Sources and types of financial, material, and other support                                                  | 14          |
| Roles and responsibilities: contributorship | <a href="#">#5a</a> | Names, affiliations, and roles of protocol contributors                                                      | 14          |

|    |                           |                     |                                                                    |      |
|----|---------------------------|---------------------|--------------------------------------------------------------------|------|
| 1  | Roles and                 | <a href="#">#5b</a> | Name and contact information for the trial sponsor                 | 14   |
| 2  | responsibilities:         |                     |                                                                    |      |
| 3  | sponsor contact           |                     |                                                                    |      |
| 4  | information               |                     |                                                                    |      |
| 5  |                           |                     |                                                                    |      |
| 6  |                           |                     |                                                                    |      |
| 7  |                           |                     |                                                                    |      |
| 8  | Roles and                 | <a href="#">#5c</a> | Role of study sponsor and funders, if any, in study design;        | 14   |
| 9  | responsibilities:         |                     | collection, management, analysis, and interpretation of data;      |      |
| 10 | sponsor and funder        |                     | writing of the report; and the decision to submit the report for   |      |
| 11 |                           |                     | publication, including whether they will have ultimate authority   |      |
| 12 |                           |                     | over any of these activities                                       |      |
| 13 |                           |                     |                                                                    |      |
| 14 |                           |                     |                                                                    |      |
| 15 |                           |                     |                                                                    |      |
| 16 | Roles and                 | <a href="#">#5d</a> | Composition, roles, and responsibilities of the coordinating       | 14   |
| 17 | responsibilities:         |                     | centre, steering committee, endpoint adjudication committee,       |      |
| 18 | committees                |                     | data management team, and other individuals or groups              |      |
| 19 |                           |                     | overseeing the trial, if applicable (see Item 21a for data         |      |
| 20 |                           |                     | monitoring committee)                                              |      |
| 21 |                           |                     |                                                                    |      |
| 22 |                           |                     |                                                                    |      |
| 23 |                           |                     |                                                                    |      |
| 24 | <b>Introduction</b>       |                     |                                                                    |      |
| 25 |                           |                     |                                                                    |      |
| 26 |                           |                     |                                                                    |      |
| 27 | Background and            | <a href="#">#6a</a> | Description of research question and justification for undertaking | 4    |
| 28 | rationale                 |                     | the trial, including summary of relevant studies (published and    |      |
| 29 |                           |                     | unpublished) examining benefits and harms for each intervention    |      |
| 30 |                           |                     |                                                                    |      |
| 31 |                           |                     |                                                                    |      |
| 32 | Background and            | <a href="#">#6b</a> | Explanation for choice of comparators                              | 4-5  |
| 33 | rationale: choice of      |                     |                                                                    |      |
| 34 | comparators               |                     |                                                                    |      |
| 35 |                           |                     |                                                                    |      |
| 36 |                           |                     |                                                                    |      |
| 37 | Objectives                | <a href="#">#7</a>  | Specific objectives or hypotheses                                  | 5    |
| 38 |                           |                     |                                                                    |      |
| 39 |                           |                     |                                                                    |      |
| 40 | Trial design              | <a href="#">#8</a>  | Description of trial design including type of trial (eg, parallel  | 5, 6 |
| 41 |                           |                     | group, crossover, factorial, single group), allocation ratio, and  |      |
| 42 |                           |                     | framework (eg, superiority, equivalence, non-inferiority,          |      |
| 43 |                           |                     | exploratory)                                                       |      |
| 44 |                           |                     |                                                                    |      |
| 45 |                           |                     |                                                                    |      |
| 46 | <b>Methods:</b>           |                     |                                                                    |      |
| 47 | <b>Participants,</b>      |                     |                                                                    |      |
| 48 | <b>interventions, and</b> |                     |                                                                    |      |
| 49 | <b>outcomes</b>           |                     |                                                                    |      |
| 50 |                           |                     |                                                                    |      |
| 51 |                           |                     |                                                                    |      |
| 52 |                           |                     |                                                                    |      |
| 53 | Study setting             | <a href="#">#9</a>  | Description of study settings (eg, community clinic, academic      | 5, 6 |
| 54 |                           |                     | hospital) and list of countries where data will be collected.      |      |
| 55 |                           |                     | Reference to where list of study sites can be obtained             |      |
| 56 |                           |                     |                                                                    |      |
| 57 |                           |                     |                                                                    |      |
| 58 |                           |                     |                                                                    |      |
| 59 |                           |                     |                                                                    |      |
| 60 |                           |                     |                                                                    |      |

|    |                              |                      |                                                                                                                                                                                                                                                                                                                                                                                |       |
|----|------------------------------|----------------------|--------------------------------------------------------------------------------------------------------------------------------------------------------------------------------------------------------------------------------------------------------------------------------------------------------------------------------------------------------------------------------|-------|
| 1  | Eligibility criteria         | <a href="#">#10</a>  | Inclusion and exclusion criteria for participants. If applicable, eligibility criteria for study centres and individuals who will perform the interventions (eg, surgeons, psychotherapists)                                                                                                                                                                                   | 6,7   |
| 2  |                              |                      |                                                                                                                                                                                                                                                                                                                                                                                |       |
| 3  |                              |                      |                                                                                                                                                                                                                                                                                                                                                                                |       |
| 4  |                              |                      |                                                                                                                                                                                                                                                                                                                                                                                |       |
| 5  |                              |                      |                                                                                                                                                                                                                                                                                                                                                                                |       |
| 6  | Interventions:               | <a href="#">#11a</a> | Interventions for each group with sufficient detail to allow replication, including how and when they will be administered                                                                                                                                                                                                                                                     | 8     |
| 7  | description                  |                      |                                                                                                                                                                                                                                                                                                                                                                                |       |
| 8  |                              |                      |                                                                                                                                                                                                                                                                                                                                                                                |       |
| 9  |                              |                      |                                                                                                                                                                                                                                                                                                                                                                                |       |
| 10 | Interventions:               | <a href="#">#11b</a> | Criteria for discontinuing or modifying allocated interventions for a given trial participant (eg, drug dose change in response to harms, participant request, or improving / worsening disease)                                                                                                                                                                               | 8, 9  |
| 11 | modifications                |                      |                                                                                                                                                                                                                                                                                                                                                                                |       |
| 12 |                              |                      |                                                                                                                                                                                                                                                                                                                                                                                |       |
| 13 |                              |                      |                                                                                                                                                                                                                                                                                                                                                                                |       |
| 14 |                              |                      |                                                                                                                                                                                                                                                                                                                                                                                |       |
| 15 | Interventions:               | <a href="#">#11c</a> | Strategies to improve adherence to intervention protocols, and any procedures for monitoring adherence (eg, drug tablet return; laboratory tests)                                                                                                                                                                                                                              | 8, 9  |
| 16 | adherence                    |                      |                                                                                                                                                                                                                                                                                                                                                                                |       |
| 17 |                              |                      |                                                                                                                                                                                                                                                                                                                                                                                |       |
| 18 |                              |                      |                                                                                                                                                                                                                                                                                                                                                                                |       |
| 19 |                              |                      |                                                                                                                                                                                                                                                                                                                                                                                |       |
| 20 | Interventions:               | <a href="#">#11d</a> | Relevant concomitant care and interventions that are permitted or prohibited during the trial                                                                                                                                                                                                                                                                                  | 8, 9  |
| 21 | concomitant care             |                      |                                                                                                                                                                                                                                                                                                                                                                                |       |
| 22 |                              |                      |                                                                                                                                                                                                                                                                                                                                                                                |       |
| 23 |                              |                      |                                                                                                                                                                                                                                                                                                                                                                                |       |
| 24 | Outcomes                     | <a href="#">#12</a>  | Primary, secondary, and other outcomes, including the specific measurement variable (eg, systolic blood pressure), analysis metric (eg, change from baseline, final value, time to event), method of aggregation (eg, median, proportion), and time point for each outcome. Explanation of the clinical relevance of chosen efficacy and harm outcomes is strongly recommended | 9, 10 |
| 25 |                              |                      |                                                                                                                                                                                                                                                                                                                                                                                |       |
| 26 |                              |                      |                                                                                                                                                                                                                                                                                                                                                                                |       |
| 27 |                              |                      |                                                                                                                                                                                                                                                                                                                                                                                |       |
| 28 |                              |                      |                                                                                                                                                                                                                                                                                                                                                                                |       |
| 29 |                              |                      |                                                                                                                                                                                                                                                                                                                                                                                |       |
| 30 |                              |                      |                                                                                                                                                                                                                                                                                                                                                                                |       |
| 31 |                              |                      |                                                                                                                                                                                                                                                                                                                                                                                |       |
| 32 |                              |                      |                                                                                                                                                                                                                                                                                                                                                                                |       |
| 33 |                              |                      |                                                                                                                                                                                                                                                                                                                                                                                |       |
| 34 | Participant timeline         | <a href="#">#13</a>  | Time schedule of enrolment, interventions (including any run-ins and washouts), assessments, and visits for participants. A schematic diagram is highly recommended (see Figure)                                                                                                                                                                                               | 10    |
| 35 |                              |                      |                                                                                                                                                                                                                                                                                                                                                                                |       |
| 36 |                              |                      |                                                                                                                                                                                                                                                                                                                                                                                |       |
| 37 |                              |                      |                                                                                                                                                                                                                                                                                                                                                                                |       |
| 38 |                              |                      |                                                                                                                                                                                                                                                                                                                                                                                |       |
| 39 |                              |                      |                                                                                                                                                                                                                                                                                                                                                                                |       |
| 40 | Sample size                  | <a href="#">#14</a>  | Estimated number of participants needed to achieve study objectives and how it was determined, including clinical and statistical assumptions supporting any sample size calculations                                                                                                                                                                                          | 5,6   |
| 41 |                              |                      |                                                                                                                                                                                                                                                                                                                                                                                |       |
| 42 |                              |                      |                                                                                                                                                                                                                                                                                                                                                                                |       |
| 43 |                              |                      |                                                                                                                                                                                                                                                                                                                                                                                |       |
| 44 |                              |                      |                                                                                                                                                                                                                                                                                                                                                                                |       |
| 45 | Recruitment                  | <a href="#">#15</a>  | Strategies for achieving adequate participant enrolment to reach target sample size                                                                                                                                                                                                                                                                                            | 7,8   |
| 46 |                              |                      |                                                                                                                                                                                                                                                                                                                                                                                |       |
| 47 |                              |                      |                                                                                                                                                                                                                                                                                                                                                                                |       |
| 48 |                              |                      |                                                                                                                                                                                                                                                                                                                                                                                |       |
| 49 | <b>Methods: Assignment</b>   |                      |                                                                                                                                                                                                                                                                                                                                                                                |       |
| 50 | <b>of interventions (for</b> |                      |                                                                                                                                                                                                                                                                                                                                                                                |       |
| 51 | <b>controlled trials)</b>    |                      |                                                                                                                                                                                                                                                                                                                                                                                |       |
| 52 |                              |                      |                                                                                                                                                                                                                                                                                                                                                                                |       |
| 53 |                              |                      |                                                                                                                                                                                                                                                                                                                                                                                |       |
| 54 | Allocation: sequence         | <a href="#">#16a</a> | Method of generating the allocation sequence (eg, computer-generated random numbers), and list of any factors for stratification. To reduce predictability of a random sequence, details of any planned restriction (eg, blocking) should be                                                                                                                                   | "n/a" |
| 55 | generation                   |                      |                                                                                                                                                                                                                                                                                                                                                                                |       |
| 56 |                              |                      |                                                                                                                                                                                                                                                                                                                                                                                |       |
| 57 |                              |                      |                                                                                                                                                                                                                                                                                                                                                                                |       |
| 58 |                              |                      |                                                                                                                                                                                                                                                                                                                                                                                |       |
| 59 |                              |                      |                                                                                                                                                                                                                                                                                                                                                                                |       |
| 60 |                              |                      |                                                                                                                                                                                                                                                                                                                                                                                |       |

provided in a separate document that is unavailable to those who enrol participants or assign interventions

|    |                        |                      |                                                                     |
|----|------------------------|----------------------|---------------------------------------------------------------------|
| 1  |                        |                      |                                                                     |
| 2  |                        |                      |                                                                     |
| 3  |                        |                      |                                                                     |
| 4  | Allocation             | <a href="#">#16b</a> | Mechanism of implementing the allocation sequence (eg, central      |
| 5  | concealment            |                      | telephone; sequentially numbered, opaque, sealed envelopes),        |
| 6  |                        |                      | describing any steps to conceal the sequence until interventions    |
| 7  | mechanism              |                      | are assigned                                                        |
| 8  |                        |                      |                                                                     |
| 9  |                        |                      |                                                                     |
| 10 |                        |                      |                                                                     |
| 11 | Allocation:            | <a href="#">#16c</a> | Who will generate the allocation sequence, who will enrol           |
| 12 | implementation         |                      | participants, and who will assign participants to interventions     |
| 13 |                        |                      |                                                                     |
| 14 | Blinding (masking)     | <a href="#">#17a</a> | Who will be blinded after assignment to interventions (eg, trial    |
| 15 |                        |                      | participants, care providers, outcome assessors, data analysts),    |
| 16 |                        |                      | and how                                                             |
| 17 |                        |                      |                                                                     |
| 18 |                        |                      |                                                                     |
| 19 |                        |                      |                                                                     |
| 20 | Blinding (masking):    | <a href="#">#17b</a> | If blinded, circumstances under which unblinding is permissible,    |
| 21 | emergency unblinding   |                      | and procedure for revealing a participant's allocated intervention  |
| 22 |                        |                      | during the trial                                                    |
| 23 |                        |                      |                                                                     |
| 24 |                        |                      |                                                                     |
| 25 | <b>Methods: Data</b>   |                      |                                                                     |
| 26 | <b>collection,</b>     |                      |                                                                     |
| 27 | <b>management, and</b> |                      |                                                                     |
| 28 | <b>analysis</b>        |                      |                                                                     |
| 29 |                        |                      |                                                                     |
| 30 |                        |                      |                                                                     |
| 31 |                        |                      |                                                                     |
| 32 | Data collection plan   | <a href="#">#18a</a> | Plans for assessment and collection of outcome, baseline, and       |
| 33 |                        |                      | other trial data, including any related processes to promote data   |
| 34 |                        |                      | quality (eg, duplicate measurements, training of assessors) and a   |
| 35 |                        |                      | description of study instruments (eg, questionnaires, laboratory    |
| 36 |                        |                      | tests) along with their reliability and validity, if known.         |
| 37 |                        |                      | Reference to where data collection forms can be found, if not in    |
| 38 |                        |                      | the protocol                                                        |
| 39 |                        |                      |                                                                     |
| 40 |                        |                      |                                                                     |
| 41 |                        |                      |                                                                     |
| 42 |                        |                      |                                                                     |
| 43 | Data collection plan:  | <a href="#">#18b</a> | Plans to promote participant retention and complete follow-up,      |
| 44 | retention              |                      | including list of any outcome data to be collected for participants |
| 45 |                        |                      | who discontinue or deviate from intervention protocols              |
| 46 |                        |                      |                                                                     |
| 47 |                        |                      |                                                                     |
| 48 | Data management        | <a href="#">#19</a>  | Plans for data entry, coding, security, and storage, including any  |
| 49 |                        |                      | related processes to promote data quality (eg, double data entry;   |
| 50 |                        |                      | range checks for data values). Reference to where details of data   |
| 51 |                        |                      | management procedures can be found, if not in the protocol          |
| 52 |                        |                      |                                                                     |
| 53 |                        |                      |                                                                     |
| 54 |                        |                      |                                                                     |
| 55 | Statistics: outcomes   | <a href="#">#20a</a> | Statistical methods for analysing primary and secondary             |
| 56 |                        |                      | outcomes. Reference to where other details of the statistical       |
| 57 |                        |                      | analysis plan can be found, if not in the protocol                  |
| 58 |                        |                      |                                                                     |
| 59 |                        |                      |                                                                     |
| 60 |                        |                      |                                                                     |

|    |                            |                      |                                                                    |        |
|----|----------------------------|----------------------|--------------------------------------------------------------------|--------|
| 1  | Statistics: additional     | <a href="#">#20b</a> | Methods for any additional analyses (eg, subgroup and adjusted     | 10     |
| 2  | analyses                   |                      | analyses)                                                          |        |
| 3  |                            |                      |                                                                    |        |
| 4  | Statistics: analysis       | <a href="#">#20c</a> | Definition of analysis population relating to protocol non-        | 10     |
| 5  | population and missing     |                      | adherence (eg, as randomised analysis), and any statistical        |        |
| 6  | data                       |                      | methods to handle missing data (eg, multiple imputation)           |        |
| 7  |                            |                      |                                                                    |        |
| 8  |                            |                      |                                                                    |        |
| 9  |                            |                      |                                                                    |        |
| 10 | <b>Methods: Monitoring</b> |                      |                                                                    |        |
| 11 |                            |                      |                                                                    |        |
| 12 | Data monitoring:           | <a href="#">#21a</a> | Composition of data monitoring committee (DMC); summary of         | 10     |
| 13 | formal committee           |                      | its role and reporting structure; statement of whether it is       |        |
| 14 |                            |                      | independent from the sponsor and competing interests; and          |        |
| 15 |                            |                      | reference to where further details about its charter can be found, |        |
| 16 |                            |                      | if not in the protocol. Alternatively, an explanation of why a     |        |
| 17 |                            |                      | DMC is not needed                                                  |        |
| 18 |                            |                      |                                                                    |        |
| 19 |                            |                      |                                                                    |        |
| 20 |                            |                      |                                                                    |        |
| 21 |                            |                      |                                                                    |        |
| 22 | Data monitoring:           | <a href="#">#21b</a> | Description of any interim analyses and stopping guidelines,       | 10     |
| 23 | interim analysis           |                      | including who will have access to these interim results and make   |        |
| 24 |                            |                      | the final decision to terminate the trial                          |        |
| 25 |                            |                      |                                                                    |        |
| 26 |                            |                      |                                                                    |        |
| 27 | Harms                      | <a href="#">#22</a>  | Plans for collecting, assessing, reporting, and managing solicited | 9      |
| 28 |                            |                      | and spontaneously reported adverse events and other unintended     |        |
| 29 |                            |                      | effects of trial interventions or trial conduct                    |        |
| 30 |                            |                      |                                                                    |        |
| 31 |                            |                      |                                                                    |        |
| 32 |                            |                      |                                                                    |        |
| 33 | Auditing                   | <a href="#">#23</a>  | Frequency and procedures for auditing trial conduct, if any, and   | 9, 10  |
| 34 |                            |                      | whether the process will be independent from investigators and     |        |
| 35 |                            |                      | the sponsor                                                        |        |
| 36 |                            |                      |                                                                    |        |
| 37 |                            |                      |                                                                    |        |
| 38 | <b>Ethics and</b>          |                      |                                                                    |        |
| 39 | <b>dissemination</b>       |                      |                                                                    |        |
| 40 |                            |                      |                                                                    |        |
| 41 |                            |                      |                                                                    |        |
| 42 | Research ethics            | <a href="#">#24</a>  | Plans for seeking research ethics committee / institutional review | 10     |
| 43 | approval                   |                      | board (REC / IRB) approval                                         |        |
| 44 |                            |                      |                                                                    |        |
| 45 |                            |                      |                                                                    |        |
| 46 | Protocol amendments        | <a href="#">#25</a>  | Plans for communicating important protocol modifications (eg,      | 10, 11 |
| 47 |                            |                      | changes to eligibility criteria, outcomes, analyses) to relevant   |        |
| 48 |                            |                      | parties (eg, investigators, REC / IRBs, trial participants, trial  |        |
| 49 |                            |                      | registries, journals, regulators)                                  |        |
| 50 |                            |                      |                                                                    |        |
| 51 |                            |                      |                                                                    |        |
| 52 |                            |                      |                                                                    |        |
| 53 | Consent or assent          | <a href="#">#26a</a> | Who will obtain informed consent or assent from potential trial    | 5, 6   |
| 54 |                            |                      | participants or authorised surrogates, and how (see Item 32)       |        |
| 55 |                            |                      |                                                                    |        |
| 56 |                            |                      |                                                                    |        |
| 57 |                            |                      |                                                                    |        |
| 58 |                            |                      |                                                                    |        |
| 59 |                            |                      |                                                                    |        |
| 60 |                            |                      |                                                                    |        |



|    |                          |                      |                                                                      |         |
|----|--------------------------|----------------------|----------------------------------------------------------------------|---------|
| 1  | Consent or assent:       | <a href="#">#26b</a> | Additional consent provisions for collection and use of              | 5,6     |
| 2  | ancillary studies        |                      | participant data and biological specimens in ancillary studies, if   |         |
| 3  |                          |                      | applicable                                                           |         |
| 4  |                          |                      |                                                                      |         |
| 5  |                          |                      |                                                                      |         |
| 6  | Confidentiality          | <a href="#">#27</a>  | How personal information about potential and enrolled                | 10      |
| 7  |                          |                      | participants will be collected, shared, and maintained in order to   |         |
| 8  |                          |                      | protect confidentiality before, during, and after the trial          |         |
| 9  |                          |                      |                                                                      |         |
| 10 |                          |                      |                                                                      |         |
| 11 | Declaration of interests | <a href="#">#28</a>  | Financial and other competing interests for principal investigators  | 14      |
| 12 |                          |                      | for the overall trial and each study site                            |         |
| 13 |                          |                      |                                                                      |         |
| 14 |                          |                      |                                                                      |         |
| 15 | Data access              | <a href="#">#29</a>  | Statement of who will have access to the final trial dataset, and    | 10      |
| 16 |                          |                      | disclosure of contractual agreements that limit such access for      |         |
| 17 |                          |                      | investigators                                                        |         |
| 18 |                          |                      |                                                                      |         |
| 19 |                          |                      |                                                                      |         |
| 20 | Ancillary and post trial | <a href="#">#30</a>  | Provisions, if any, for ancillary and post-trial care, and for       | "n/a"   |
| 21 | care                     |                      | compensation to those who suffer harm from trial participation       |         |
| 22 |                          |                      |                                                                      |         |
| 23 |                          |                      |                                                                      |         |
| 24 | Dissemination policy:    | <a href="#">#31a</a> | Plans for investigators and sponsor to communicate trial results     | 10      |
| 25 | trial results            |                      | to participants, healthcare professionals, the public, and other     |         |
| 26 |                          |                      | relevant groups (eg, via publication, reporting in results           |         |
| 27 |                          |                      | databases, or other data sharing arrangements), including any        |         |
| 28 |                          |                      | publication restrictions                                             |         |
| 29 |                          |                      |                                                                      |         |
| 30 |                          |                      |                                                                      |         |
| 31 |                          |                      |                                                                      |         |
| 32 |                          |                      |                                                                      |         |
| 33 | Dissemination policy:    | <a href="#">#31b</a> | Authorship eligibility guidelines and any intended use of            | 14      |
| 34 | authorship               |                      | professional writers                                                 |         |
| 35 |                          |                      |                                                                      |         |
| 36 |                          |                      |                                                                      |         |
| 37 | Dissemination policy:    | <a href="#">#31c</a> | Plans, if any, for granting public access to the full protocol,      | "n/a"   |
| 38 | reproducible research    |                      | participant-level dataset, and statistical code                      |         |
| 39 |                          |                      |                                                                      |         |
| 40 |                          |                      |                                                                      |         |
| 41 | <b>Appendices</b>        |                      |                                                                      |         |
| 42 |                          |                      |                                                                      |         |
| 43 | Informed consent         | <a href="#">#32</a>  | Model consent form and other related documentation given to          | "n/a"   |
| 44 | materials                |                      | participants and authorised surrogates                               |         |
| 45 |                          |                      |                                                                      |         |
| 46 |                          |                      |                                                                      |         |
| 47 | Biological specimens     | <a href="#">#33</a>  | Plans for collection, laboratory evaluation, and storage of          | Table 2 |
| 48 |                          |                      | biological specimens for genetic or molecular analysis in the        |         |
| 49 |                          |                      | current trial and for future use in ancillary studies, if applicable |         |
| 50 |                          |                      |                                                                      |         |
| 51 |                          |                      |                                                                      |         |

The SPIRIT checklist is distributed under the terms of the Creative Commons Attribution License CC-BY-ND 3.0. This checklist was completed on 12. October 2020 using <https://www.goodreports.org/>, a tool made by the [EQUATOR Network](#) in collaboration with [Penelope.ai](#)
